# Supplementary material
Source: PubMed Central journal article supplement (PMC4030441)
Supplement: NIHMS573685-supplement-01.pdf [file NIHMS573685-supplement-01.pdf]

Supporting Information for:

(Synthesis and) Structure Activity Relationships of Schweinfurthin Indoles

John G. Kodet,<sup>a</sup> John A. Beutler,<sup>b</sup> and David F. Wiemer<sup>\*a</sup>

<sup>a</sup>*Department of Chemistry University of Iowa, Iowa City, Iowa 52242-1294*

<sup>b</sup>*Molecular Targets Laboratory, Center for Cancer Research, NCI-Frederick, Frederick, MD 21702*

*david-wiemer@uiowa.edu*

**Supplemental Table of Contents**

|                                                                                |     |
|--------------------------------------------------------------------------------|-----|
| 300 MHz <sup>1</sup> H NMR (CDCl <sub>3</sub> ) spectrum of compound <b>12</b> | S3  |
| 75 MHz <sup>13</sup> C NMR (CDCl <sub>3</sub> ) spectrum of compound <b>12</b> | S4  |
| 300 MHz <sup>1</sup> H NMR (CDCl <sub>3</sub> ) spectrum of compound <b>13</b> | S5  |
| 75 MHz <sup>13</sup> C NMR (CDCl <sub>3</sub> ) spectrum of compound <b>13</b> | S6  |
| 300 MHz <sup>1</sup> H NMR (CDCl <sub>3</sub> ) spectrum of compound <b>14</b> | S7  |
| 75 MHz <sup>13</sup> C NMR (CDCl <sub>3</sub> ) spectrum of compound <b>14</b> | S8  |
| 300 MHz <sup>1</sup> H NMR (CDCl <sub>3</sub> ) spectrum of compound <b>16</b> | S9  |
| 75 MHz <sup>13</sup> C NMR (CDCl <sub>3</sub> ) spectrum of compound <b>16</b> | S10 |
| 300 MHz <sup>1</sup> H NMR (CDCl <sub>3</sub> ) spectrum of compound <b>17</b> | S11 |
| 75 MHz <sup>13</sup> C NMR (CDCl <sub>3</sub> ) spectrum of compound <b>17</b> | S12 |
| 300 MHz <sup>1</sup> H NMR (CD <sub>3</sub> OD) spectrum of compound <b>18</b> | S13 |
| 75 MHz <sup>13</sup> C NMR (CD <sub>3</sub> OD) spectrum of compound <b>18</b> | S14 |
| 300 MHz <sup>1</sup> H NMR (CDCl <sub>3</sub> ) spectrum of compound <b>23</b> | S15 |
| 75 MHz <sup>13</sup> C NMR (CDCl <sub>3</sub> ) spectrum of compound <b>23</b> | S16 |
| 300 MHz <sup>1</sup> H NMR (CDCl <sub>3</sub> ) spectrum of compound <b>31</b> | S17 |
| 75 MHz <sup>13</sup> C NMR (CDCl <sub>3</sub> ) spectrum of compound <b>31</b> | S18 |
| 300 MHz <sup>1</sup> H NMR (CDCl <sub>3</sub> ) spectrum of compound <b>24</b> | S19 |
| 75 MHz <sup>13</sup> C NMR (CDCl <sub>3</sub> ) spectrum of compound <b>24</b> | S20 |
| 300 MHz <sup>1</sup> H NMR (CDCl <sub>3</sub> ) spectrum of compound <b>25</b> | S21 |
| 75 MHz <sup>13</sup> C NMR (CDCl <sub>3</sub> ) spectrum of compound <b>25</b> | S22 |
| 300 MHz <sup>1</sup> H NMR (CDCl <sub>3</sub> ) spectrum of compound <b>19</b> | S23 |
| 75 MHz <sup>13</sup> C NMR (CDCl <sub>3</sub> ) spectrum of compound <b>19</b> | S24 |
| 300 MHz <sup>1</sup> H NMR (CDCl <sub>3</sub> ) spectrum of compound <b>27</b> | S25 |
| 75 MHz <sup>13</sup> C NMR (CDCl <sub>3</sub> ) spectrum of compound <b>27</b> | S26 |
| 300 MHz <sup>1</sup> H NMR (CDCl <sub>3</sub> ) spectrum of compound <b>28</b> | S27 |
| 75 MHz <sup>13</sup> C NMR (CDCl <sub>3</sub> ) spectrum of compound <b>28</b> | S28 |
| 300 MHz <sup>1</sup> H NMR (CDCl <sub>3</sub> ) spectrum of compound <b>30</b> | S29 |
| 75 MHz <sup>13</sup> C NMR (CDCl <sub>3</sub> ) spectrum of compound <b>30</b> | S30 |

|                                                                                 |     |
|---------------------------------------------------------------------------------|-----|
| 300 MHz <sup>1</sup> H NMR (CDCl <sub>3</sub> ) spectrum of compound <b>20</b>  | S31 |
| 75 MHz <sup>13</sup> C NMR (CDCl <sub>3</sub> ) spectrum of compound <b>20</b>  | S32 |
| 300 MHz <sup>1</sup> H NMR (CDCl <sub>3</sub> ) spectrum of compound <b>32</b>  | S33 |
| 75 MHz <sup>13</sup> C NMR (CDCl <sub>3</sub> ) spectrum of compound <b>32</b>  | S34 |
| 300 MHz <sup>1</sup> H NMR (CDCl <sub>3</sub> ) spectrum of compound <b>33</b>  | S35 |
| 75 MHz <sup>13</sup> C NMR (CDCl <sub>3</sub> ) spectrum of compound <b>33</b>  | S36 |
| 300 MHz <sup>1</sup> H NMR (CDCl <sub>3</sub> ) spectrum of compound <b>21</b>  | S37 |
| 75 MHz <sup>13</sup> C NMR (CDCl <sub>3</sub> ) spectrum of compound <b>21</b>  | S38 |
| 400 MHz <sup>1</sup> H NMR (CDCl <sub>3</sub> ) spectrum of compound <b>34</b>  | S39 |
| 100 MHz <sup>13</sup> C NMR (CDCl <sub>3</sub> ) spectrum of compound <b>34</b> | S40 |
| 300 MHz <sup>1</sup> H NMR (CDCl <sub>3</sub> ) spectrum of compound <b>35</b>  | S41 |
| 75 MHz <sup>13</sup> C NMR (CDCl <sub>3</sub> ) spectrum of compound <b>35</b>  | S42 |
| 300 MHz <sup>1</sup> H NMR (CDCl <sub>3</sub> ) spectrum of compound <b>36</b>  | S43 |
| 75 MHz <sup>13</sup> C NMR (CDCl <sub>3</sub> ) spectrum of compound <b>36</b>  | S44 |
| 300 MHz <sup>1</sup> H NMR (CDCl <sub>3</sub> ) spectrum of compound <b>37</b>  | S45 |
| 75 MHz <sup>13</sup> C NMR (CDCl <sub>3</sub> ) spectrum of compound <b>37</b>  | S46 |
| 300 MHz <sup>1</sup> H NMR (CDCl <sub>3</sub> ) spectrum of compound <b>38</b>  | S47 |
| 75 MHz <sup>13</sup> C NMR (CDCl <sub>3</sub> ) spectrum of compound <b>38</b>  | S48 |
| 300 MHz <sup>1</sup> H NMR (CDCl <sub>3</sub> ) spectrum of compound <b>39</b>  | S49 |
| 75 MHz <sup>13</sup> C NMR (CDCl <sub>3</sub> ) spectrum of compound <b>39</b>  | S50 |
| 300 MHz <sup>1</sup> H NMR (CDCl <sub>3</sub> ) spectrum of compound <b>40</b>  | S51 |
| 75 MHz <sup>13</sup> C NMR (CDCl <sub>3</sub> ) spectrum of compound <b>40</b>  | S52 |
| 300 MHz <sup>1</sup> H NMR (CDCl <sub>3</sub> ) spectrum of compound <b>41</b>  | S53 |
| 75 MHz <sup>13</sup> C NMR (CDCl <sub>3</sub> ) spectrum of compound <b>41</b>  | S54 |
| 300 MHz <sup>1</sup> H NMR (CDCl <sub>3</sub> ) spectrum of compound <b>43</b>  | S55 |
| 75 MHz <sup>13</sup> C NMR (CDCl <sub>3</sub> ) spectrum of compound <b>43</b>  | S56 |
| 300 MHz <sup>1</sup> H NMR (CDCl <sub>3</sub> ) spectrum of compound <b>46</b>  | S57 |
| 75 MHz <sup>13</sup> C NMR (CDCl <sub>3</sub> ) spectrum of compound <b>46</b>  | S58 |
| 300 MHz <sup>1</sup> H NMR (CDCl <sub>3</sub> ) spectrum of compound <b>47</b>  | S59 |
| 75 MHz <sup>13</sup> C NMR (CDCl <sub>3</sub> ) spectrum of compound <b>47</b>  | S60 |
| 300 MHz <sup>1</sup> H NMR (CDCl <sub>3</sub> ) spectrum of compound <b>49</b>  | S61 |
| 75 MHz <sup>13</sup> C NMR (CDCl <sub>3</sub> ) spectrum of compound <b>49</b>  | S62 |
| 300 MHz <sup>1</sup> H NMR (CDCl <sub>3</sub> ) spectrum of compound <b>50</b>  | S63 |
| 75 MHz <sup>13</sup> C NMR (CDCl <sub>3</sub> ) spectrum of compound <b>50</b>  | S64 |
| Average Mean Graph NCI 60 cell line data for compound <b>5</b>                  | S65 |
| Average Mean Graph NCI 60 cell line data for compound <b>6</b>                  | S66 |
| Average Mean Graph NCI 60 cell line data for compound <b>7</b>                  | S67 |
| Average Mean Graph NCI 60 cell line data for compound <b>8</b>                  | S68 |
| Average Mean Graph NCI 60 cell line data for compound <b>18</b>                 | S69 |
| Average Mean Graph NCI 60 cell line data for compound <b>19</b>                 | S70 |
| Average Mean Graph NCI 60 cell line data for compound <b>20</b>                 | S71 |
| Average Mean Graph NCI 60 cell line data for compound <b>21</b>                 | S72 |
| Average Mean Graph NCI 60 cell line data for compound <b>38</b>                 | S73 |
| Average Mean Graph NCI 60 cell line data for compound <b>43</b>                 | S74 |
| Average Mean Graph NCI 60 cell line data for compound <b>47</b>                 | S75 |
| Average Mean Graph NCI 60 cell line data for compound <b>50</b>                 | S76 |

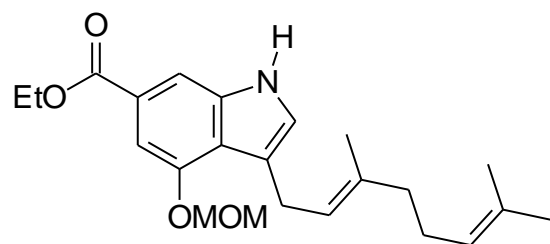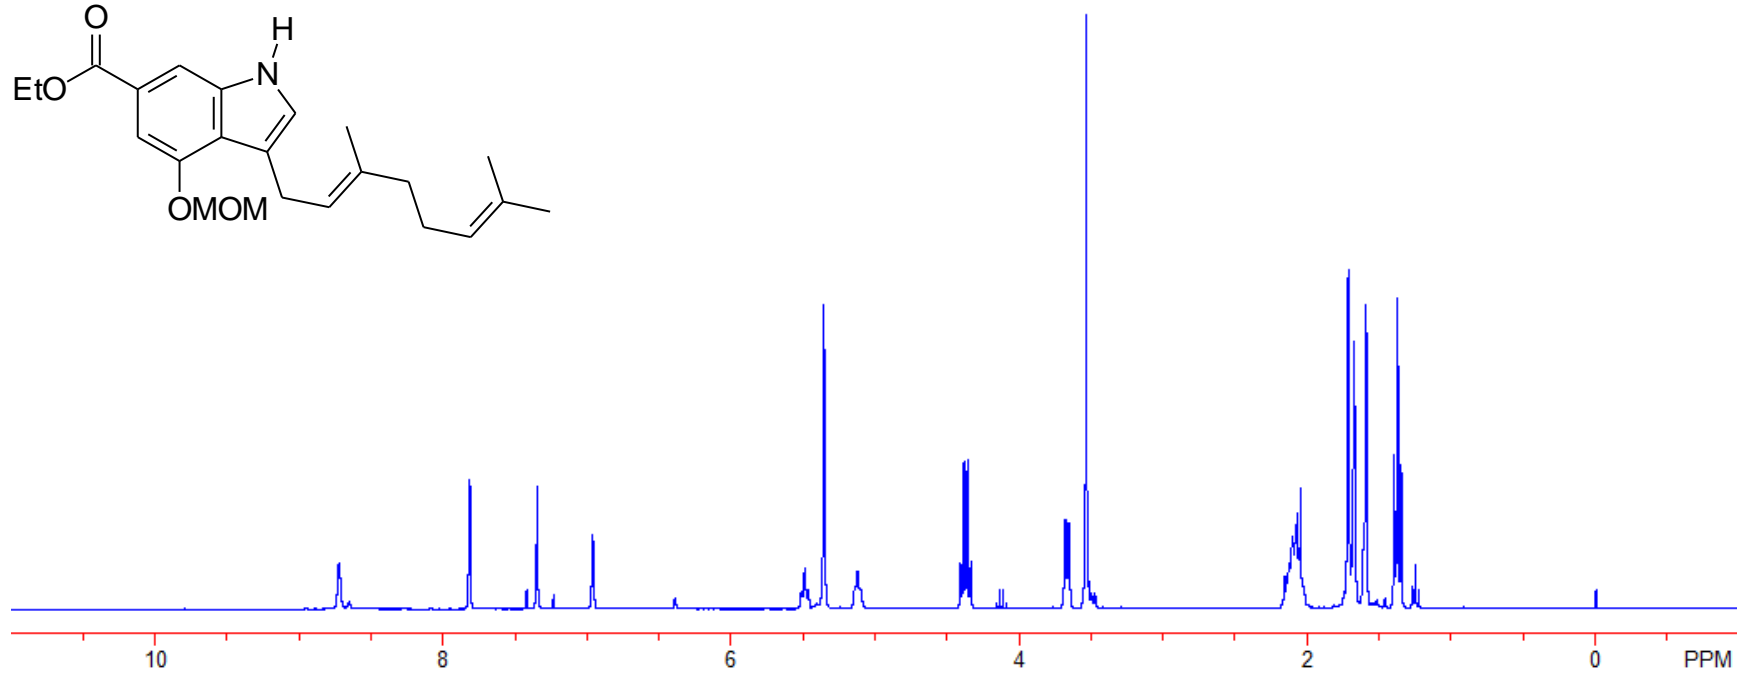

300 MHz <sup>1</sup>H NMR Spectrum for Compound 12

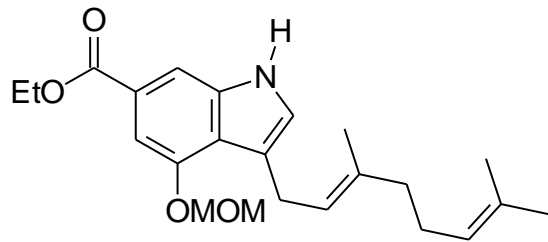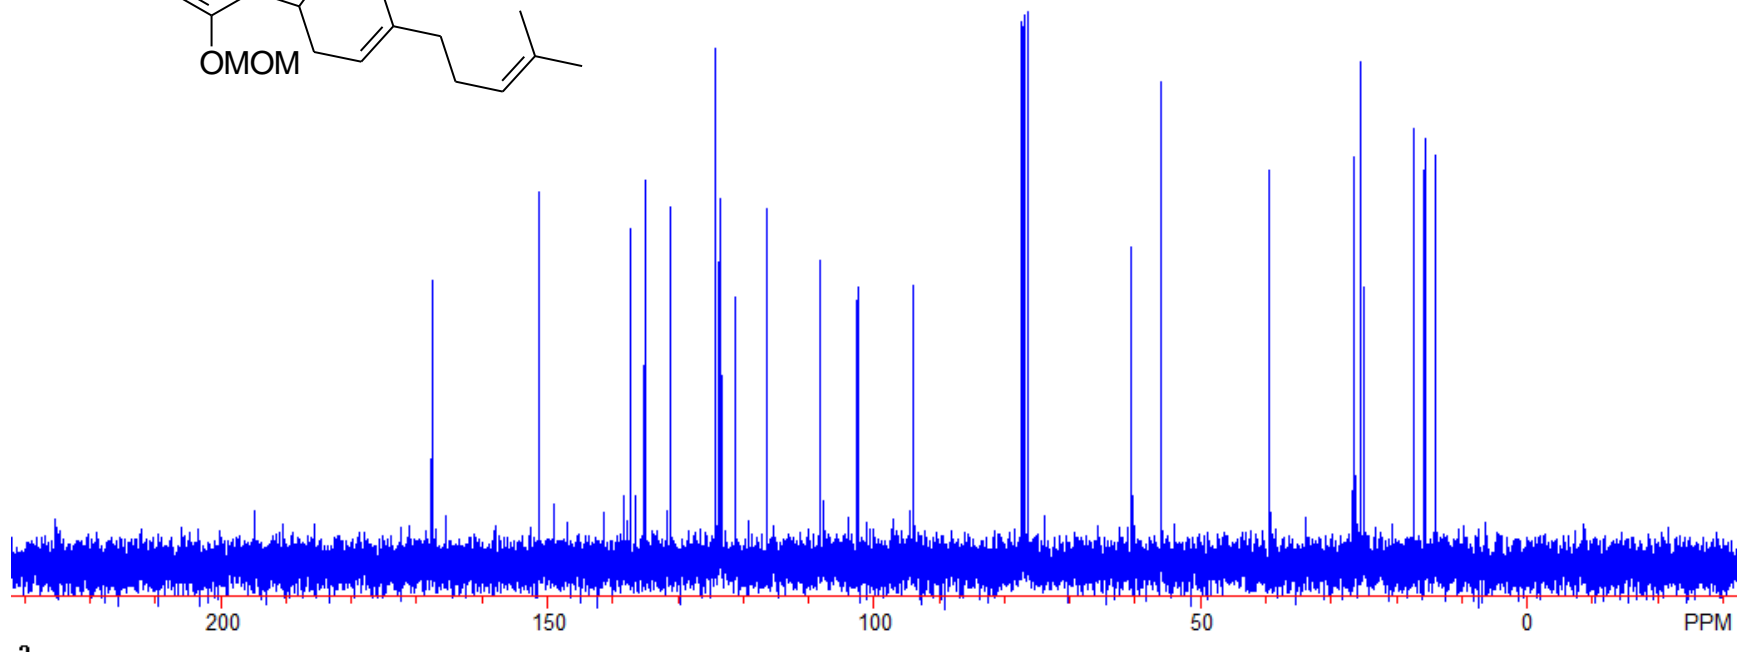

75 MHz <sup>13</sup>C NMR Spectrum for Compound 12

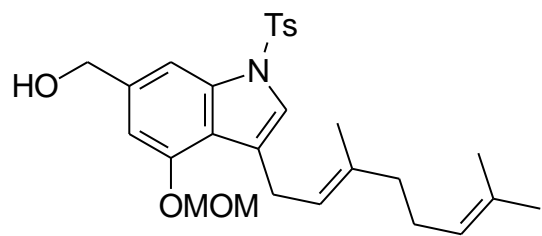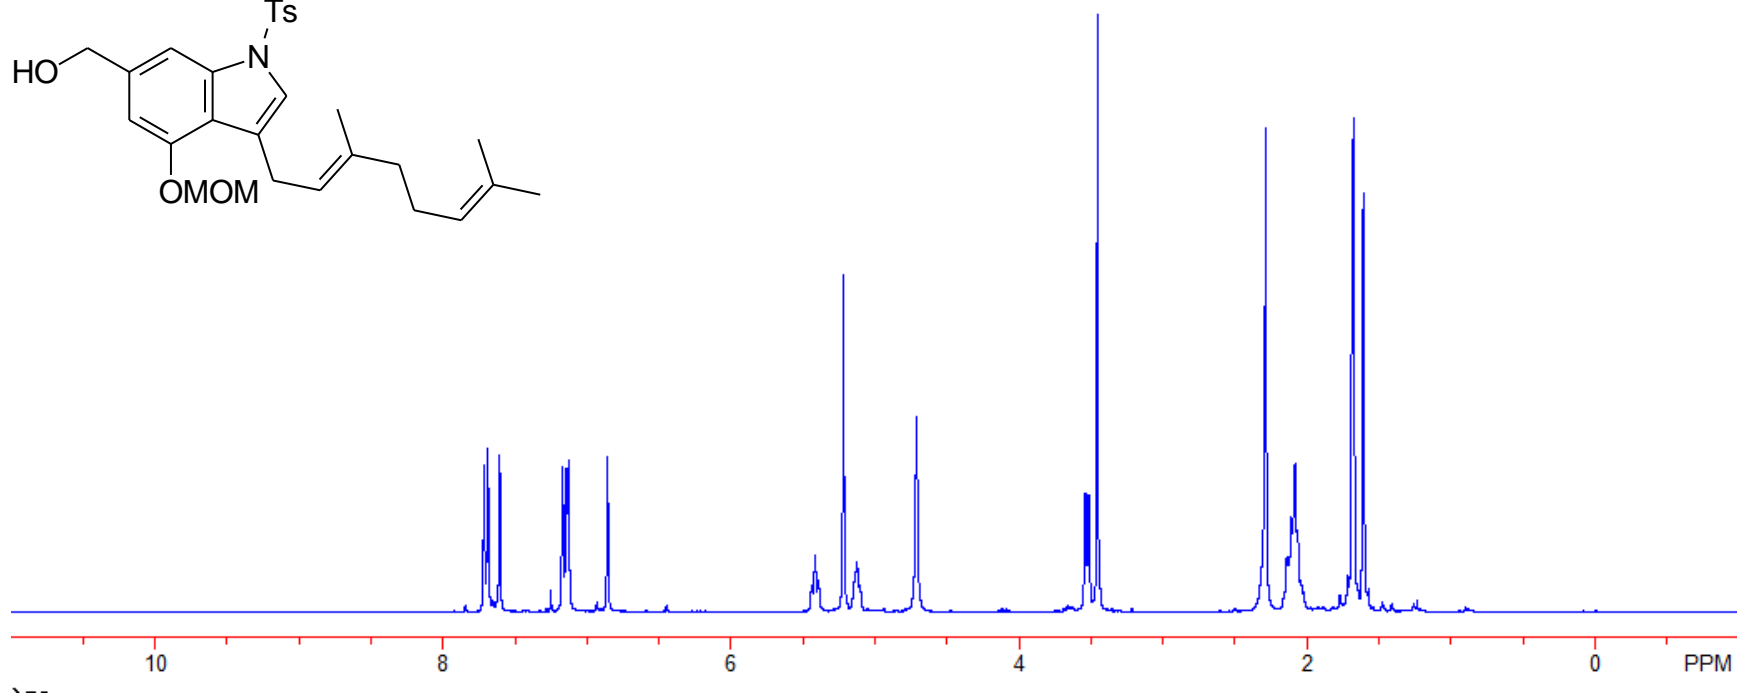

300 MHz <sup>1</sup>H NMR Spectrum for Compound 13

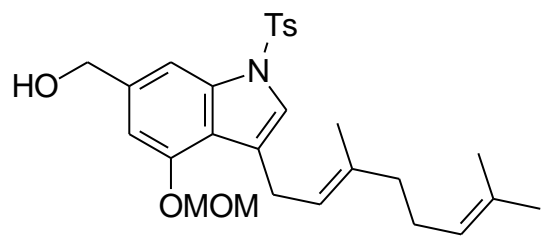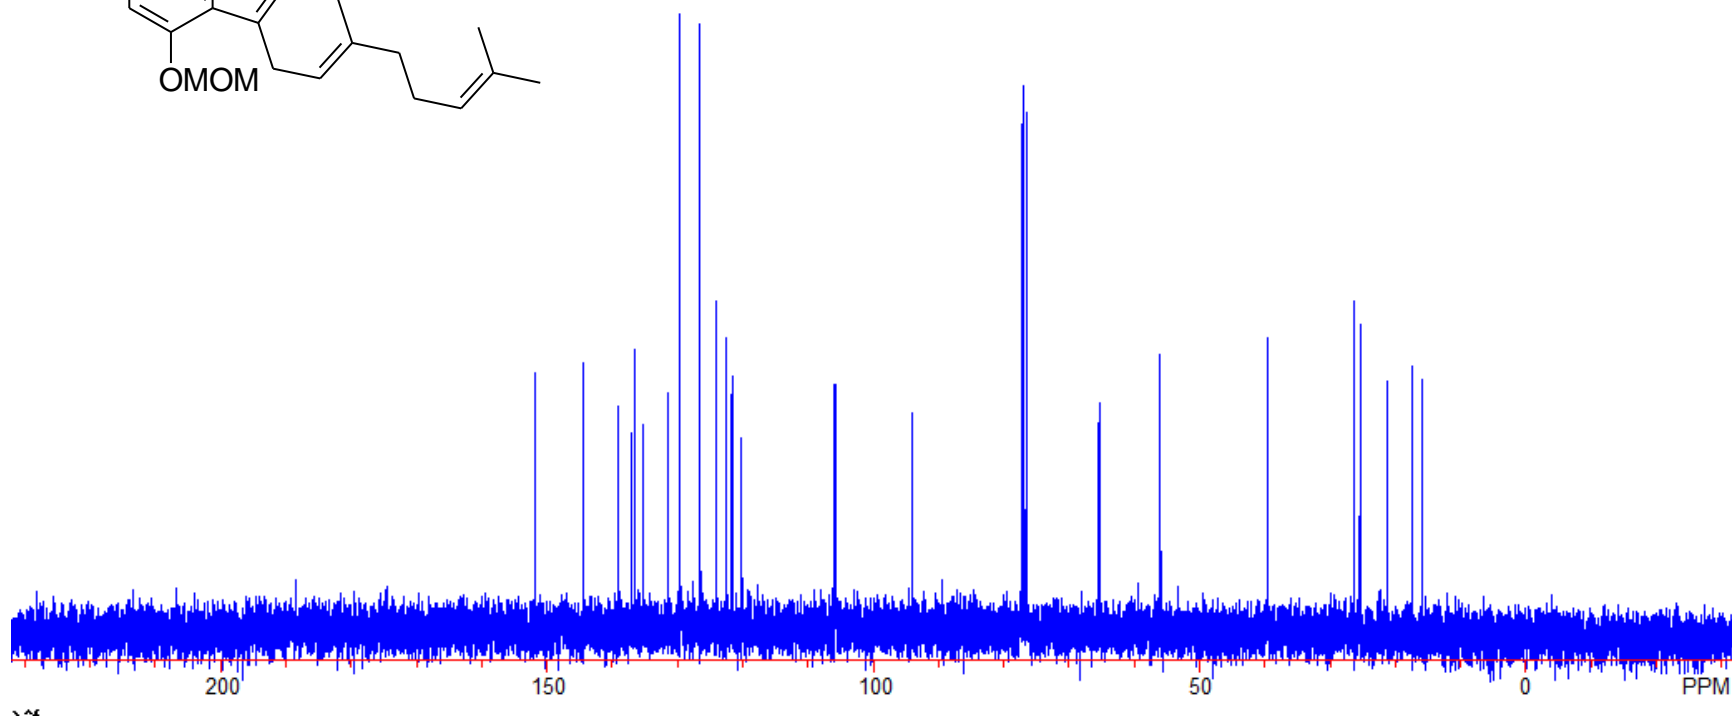

75 MHz <sup>13</sup>C NMR Spectrum for Compound 13

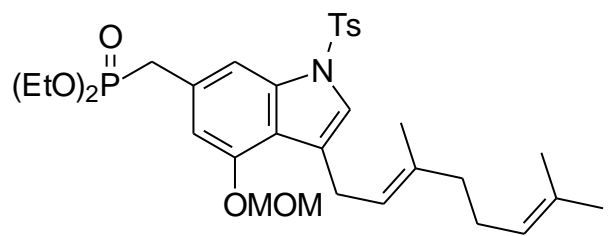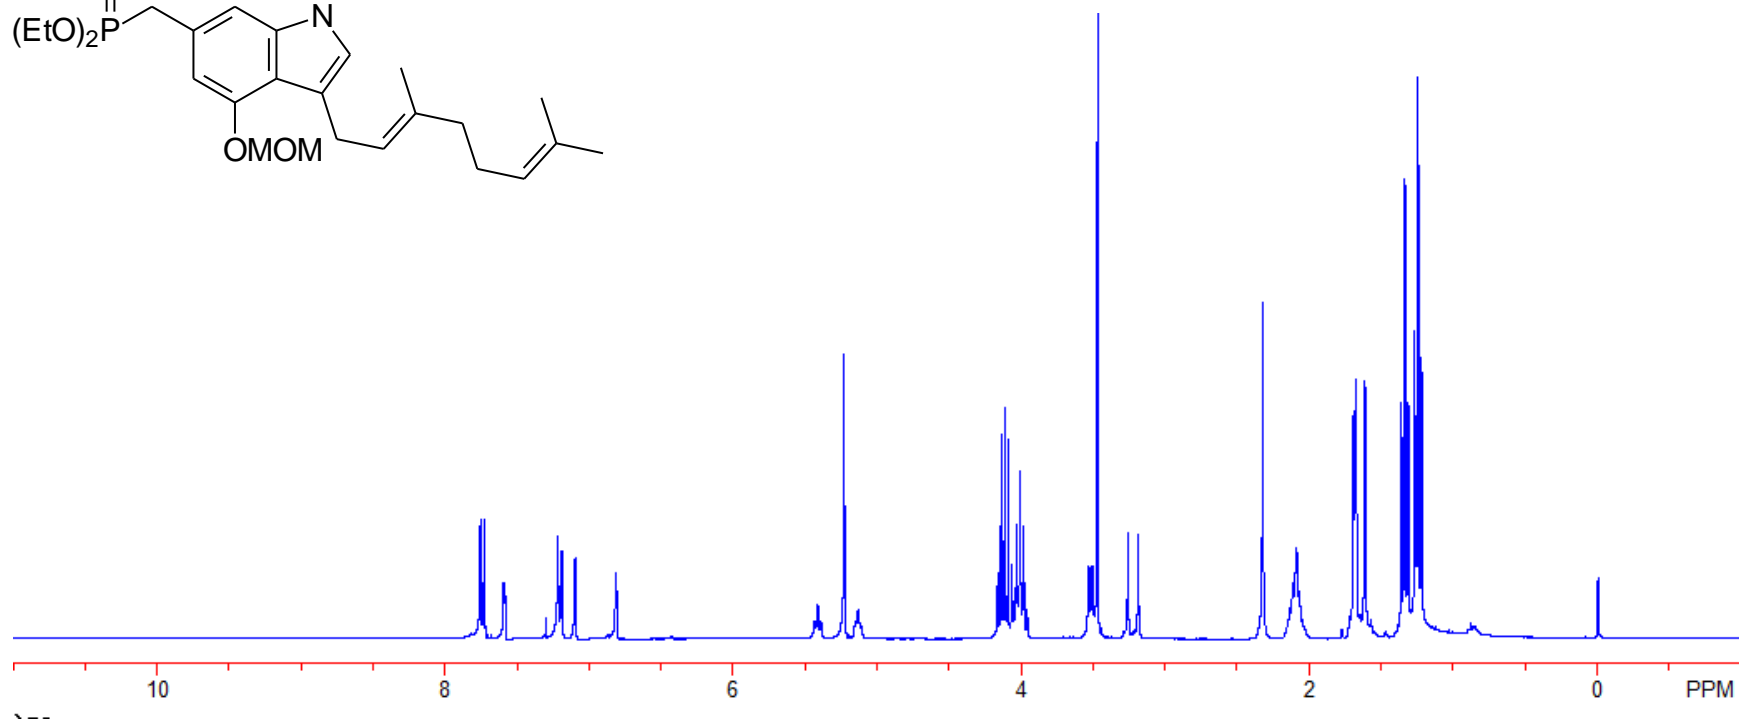

300 MHz <sup>1</sup>H NMR Spectrum for Compound 14

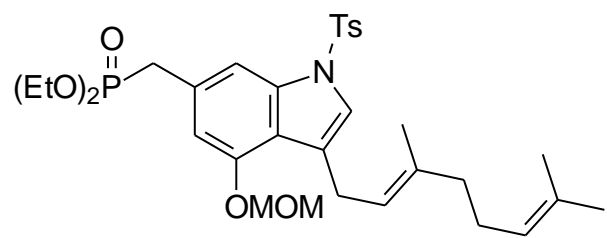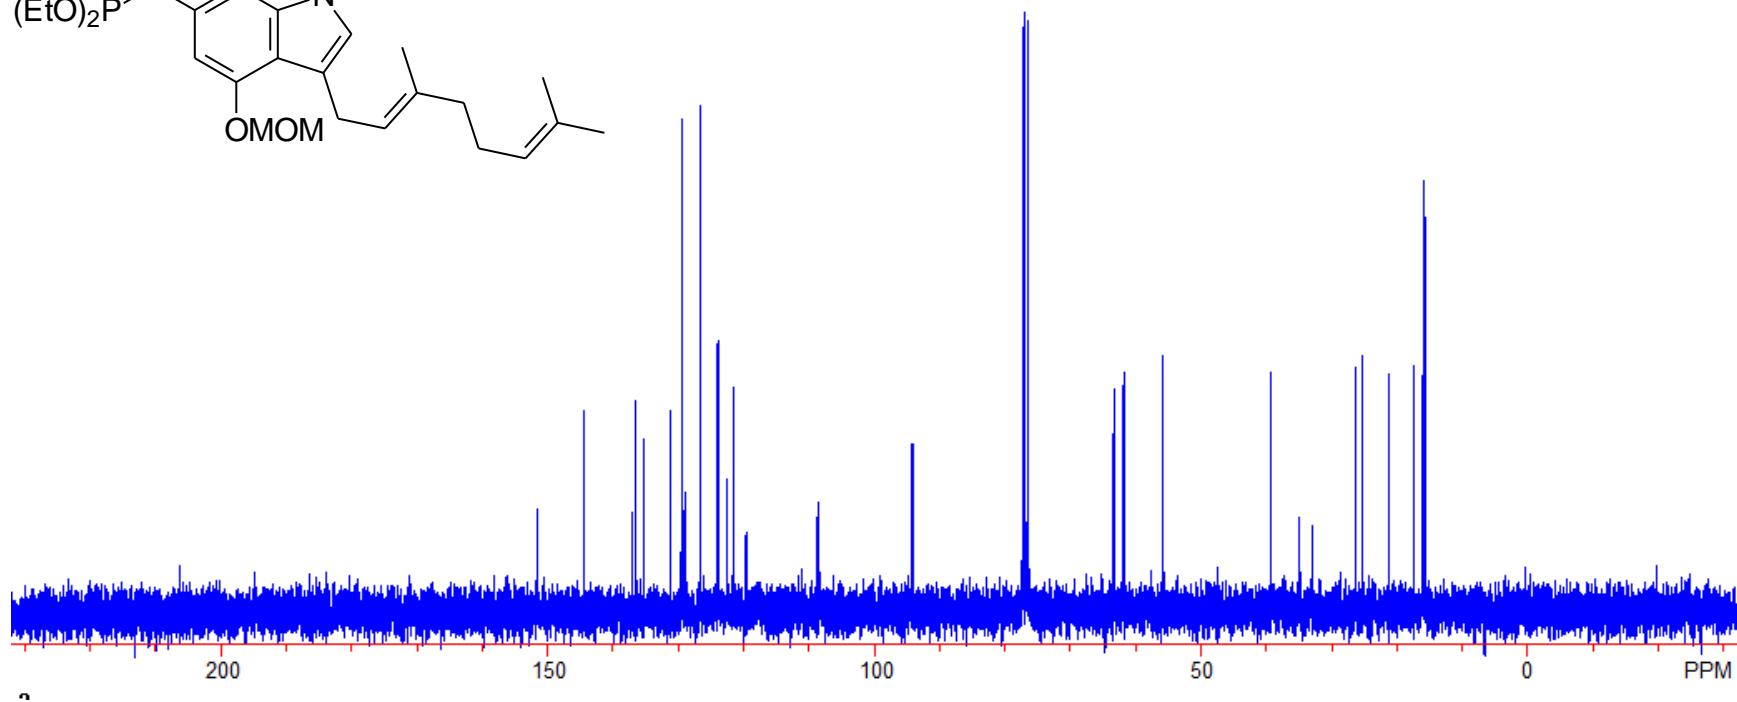

75 MHz  $^{13}\text{C}$  NMR Spectrum for Compound 14



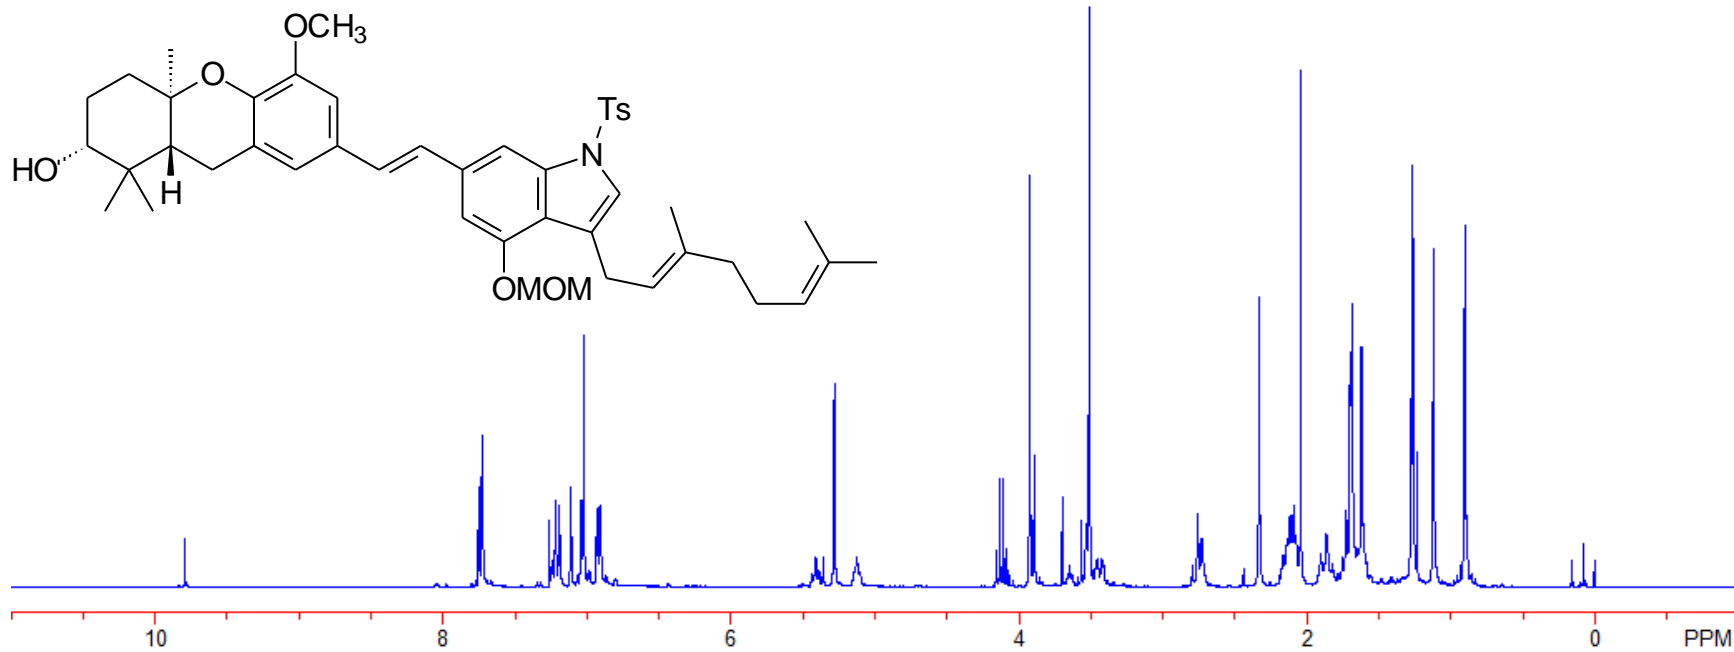

300 MHz <sup>1</sup>H NMR Spectrum for Compound 16

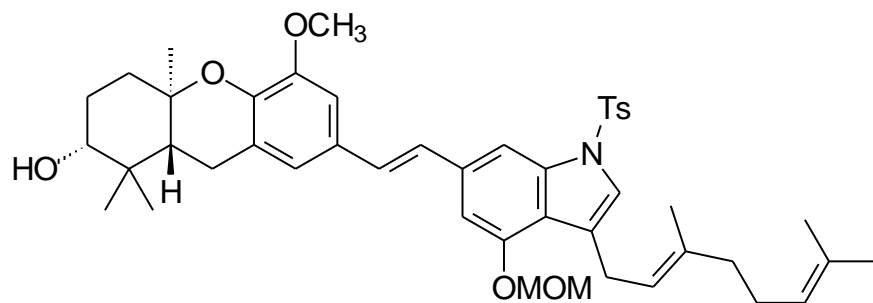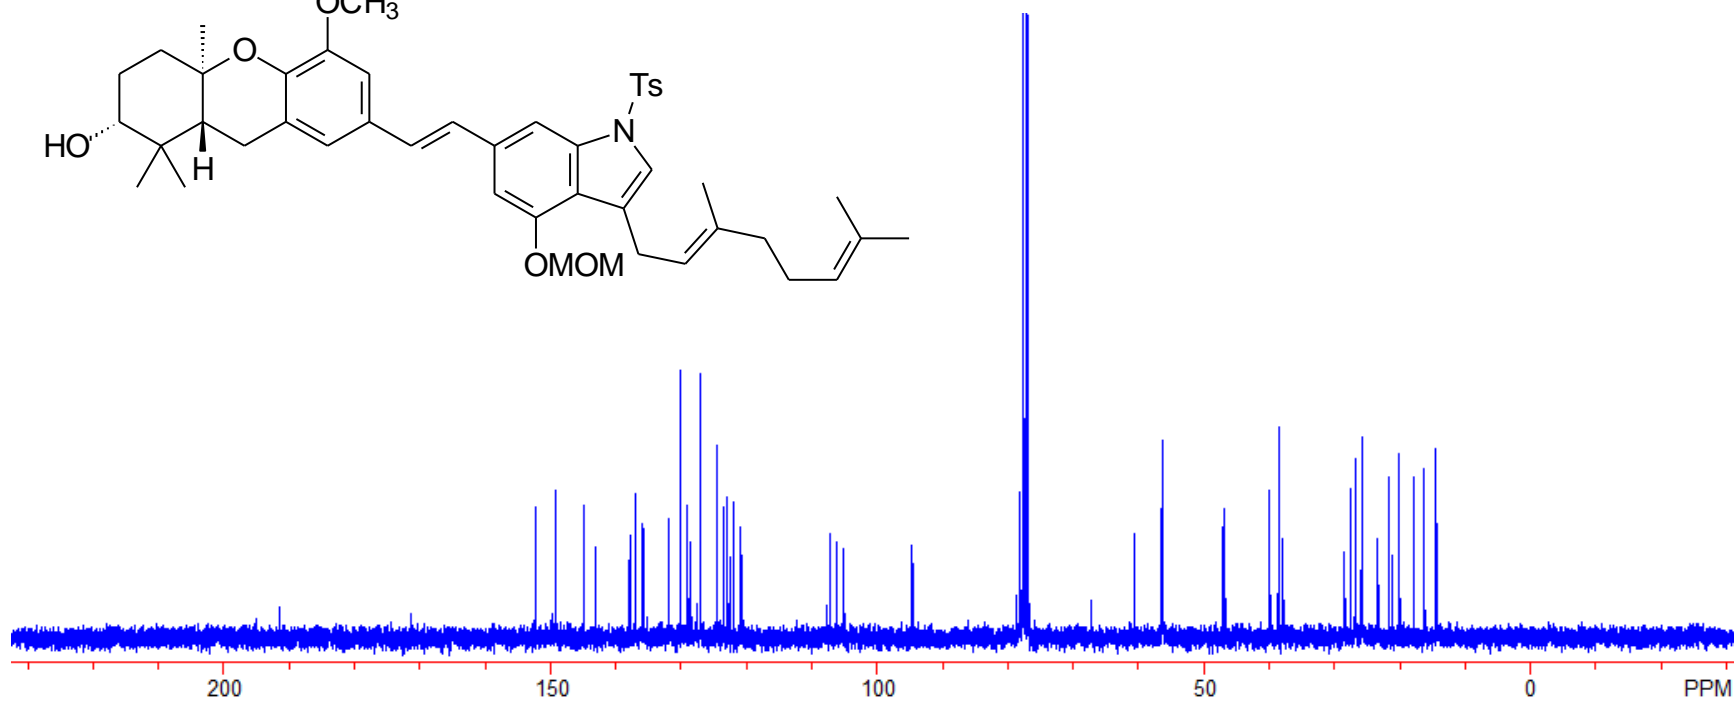

75 MHz <sup>13</sup>C NMR Spectrum for Compound 16

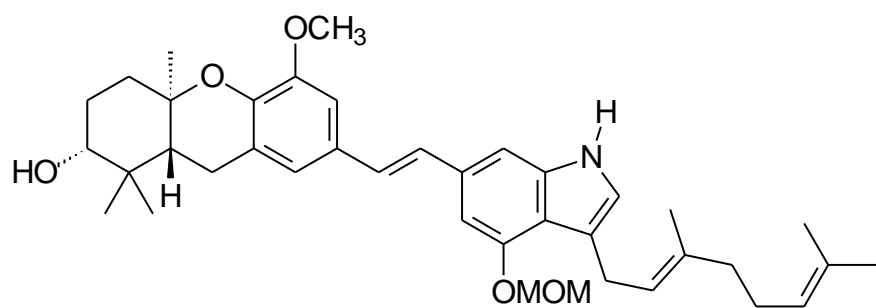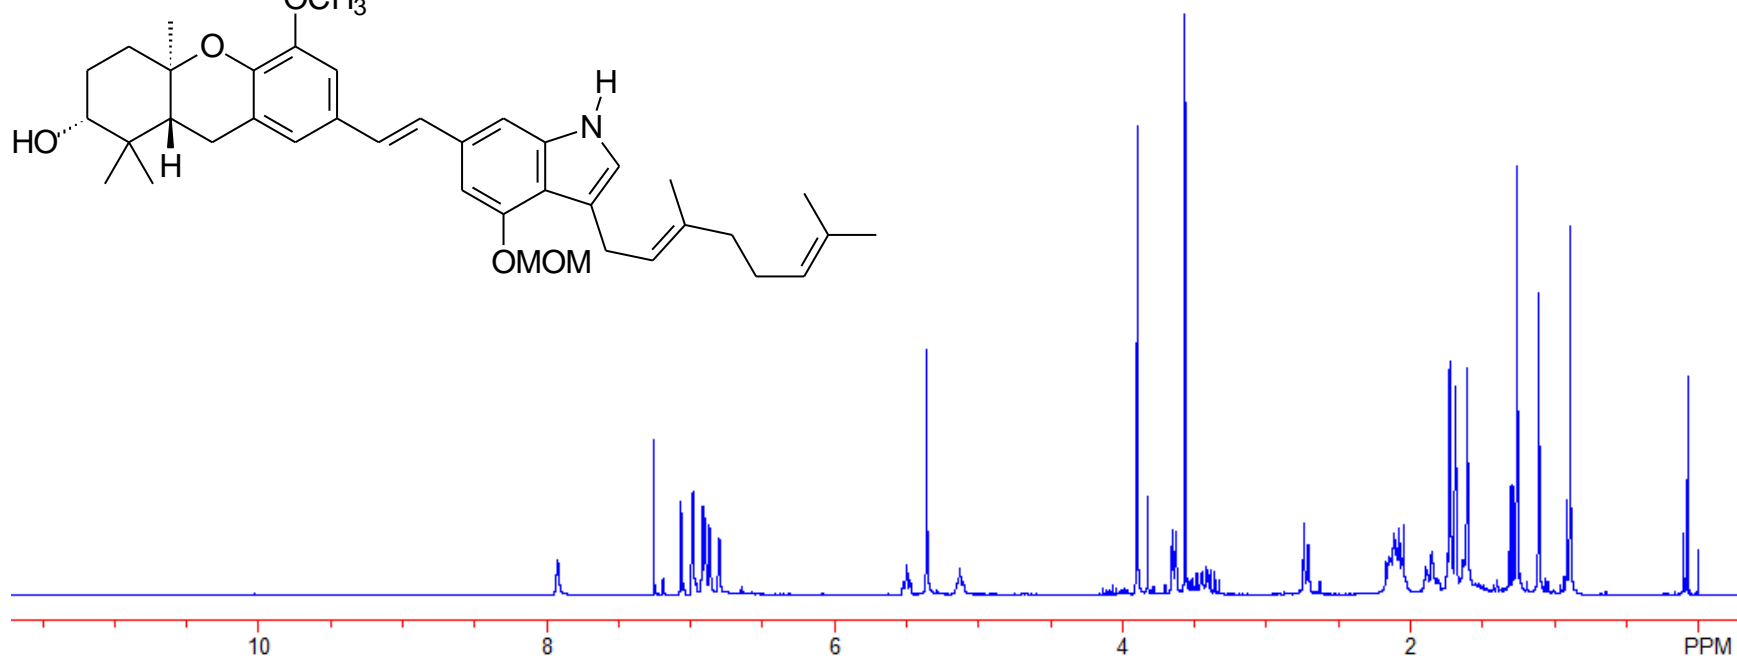

300 MHz <sup>1</sup>H NMR Spectrum for Compound 17

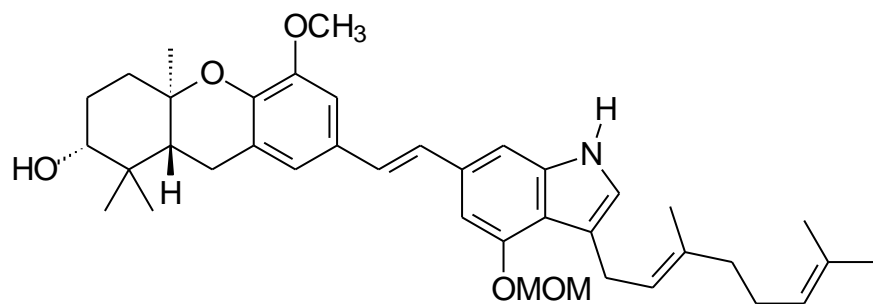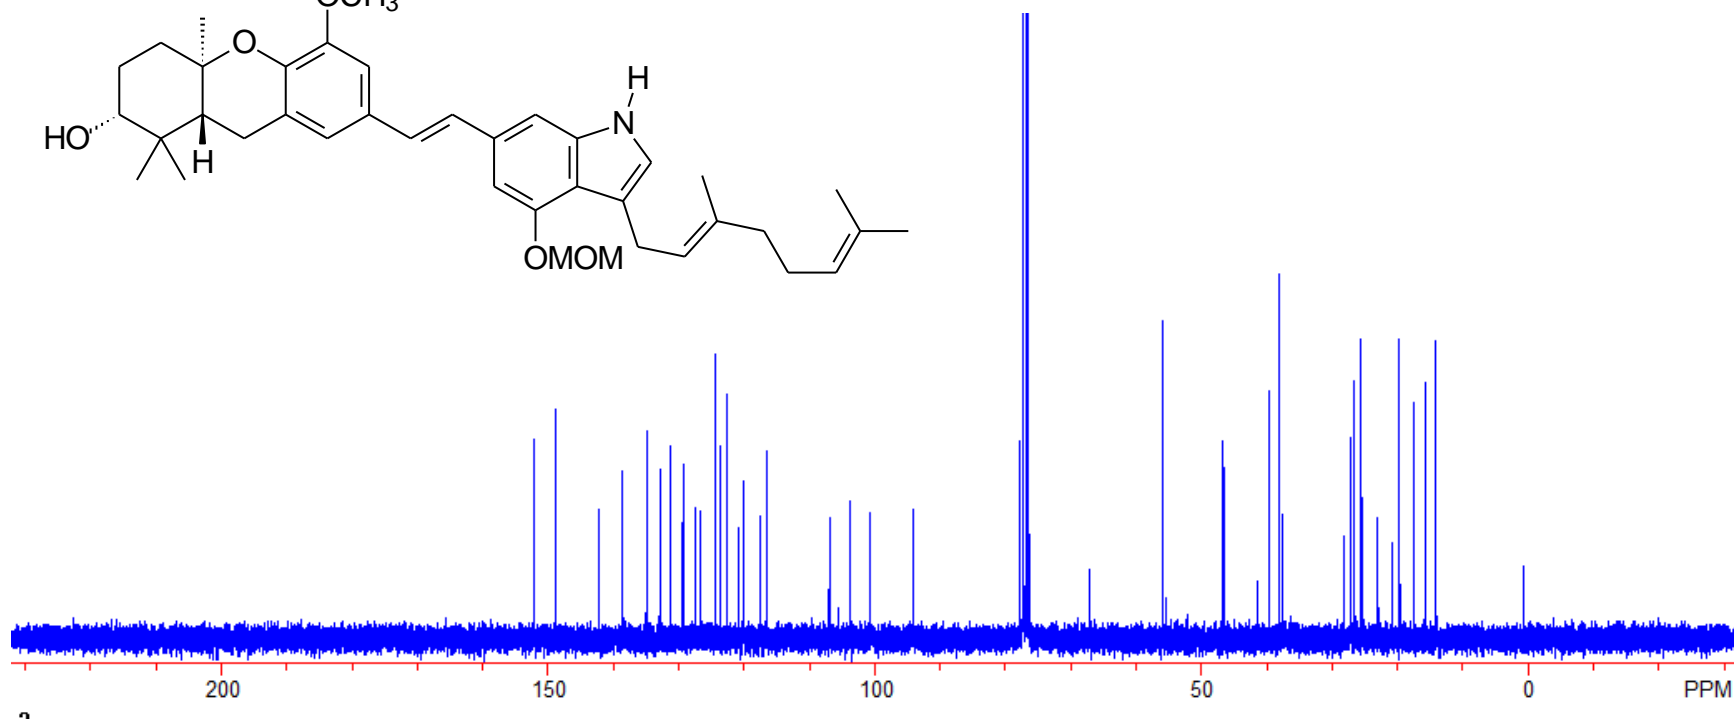

75 MHz <sup>13</sup>C NMR Spectrum for Compound 17

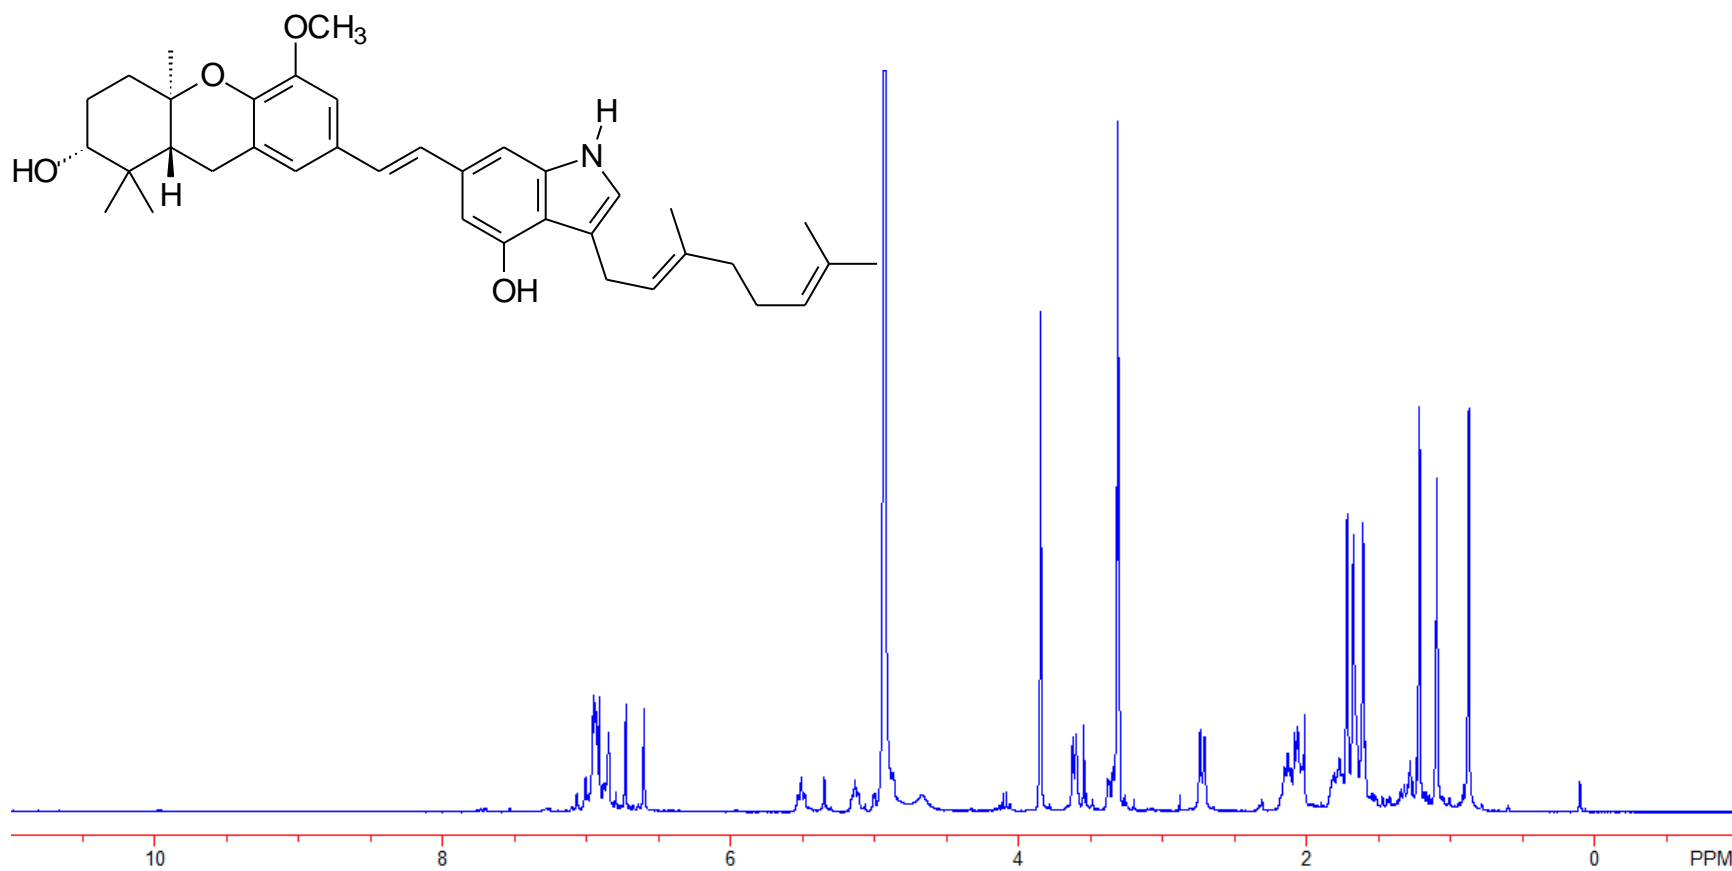

300 MHz <sup>1</sup>H NMR Spectrum (CD<sub>3</sub>OD) for Compound **18**

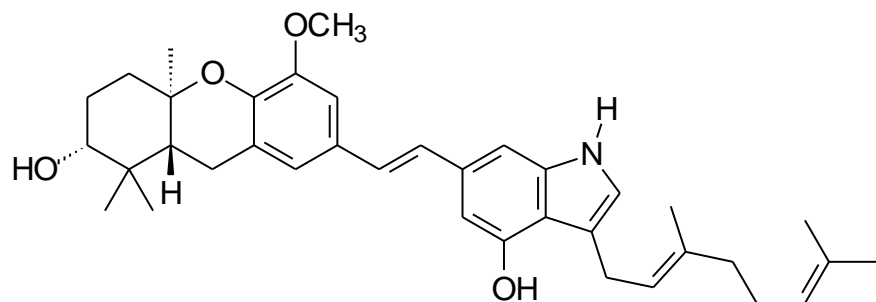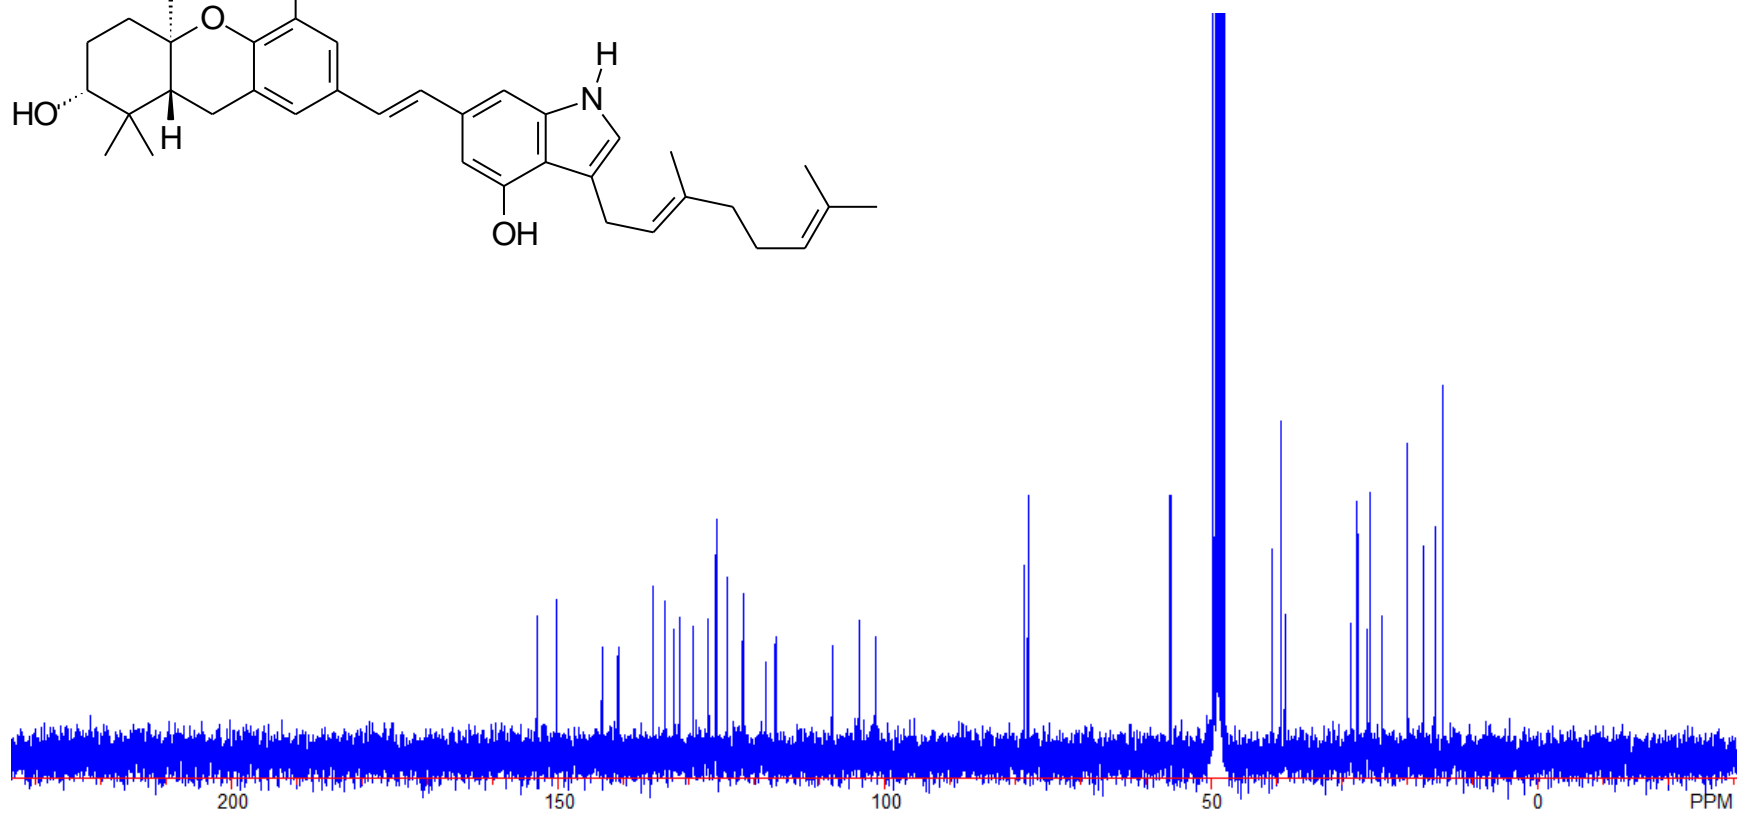

75 MHz  $^{13}\text{C}$  NMR Spectrum ( $\text{CD}_3\text{OD}$ ) for Compound **18**

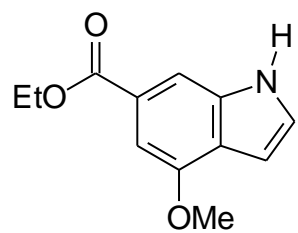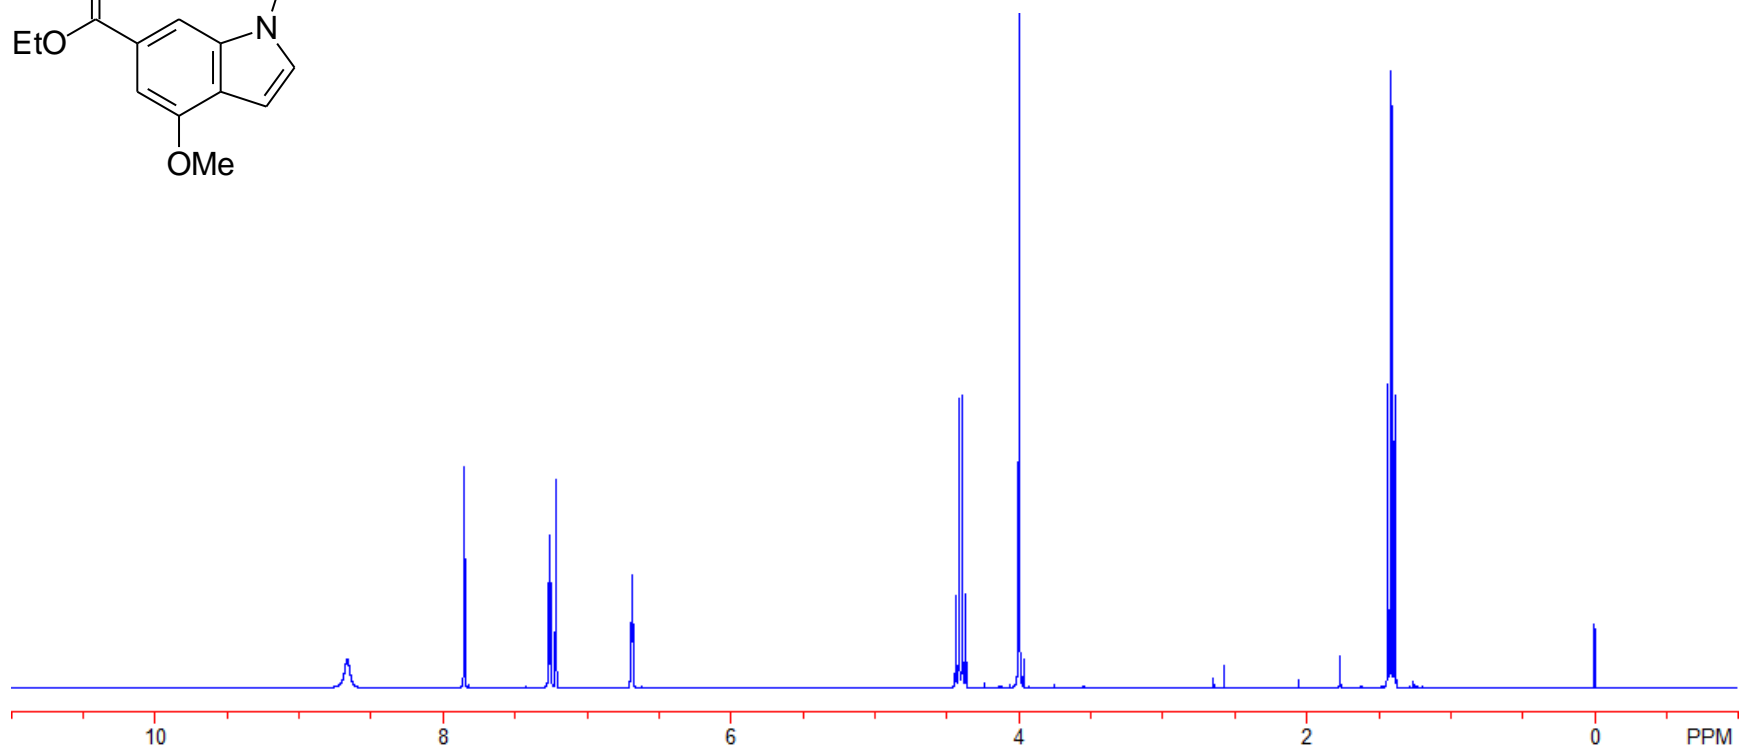

300 MHz <sup>1</sup>H NMR Spectrum for Compound 23

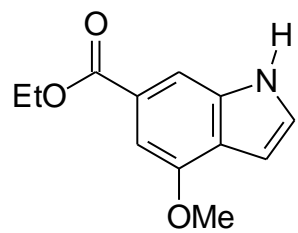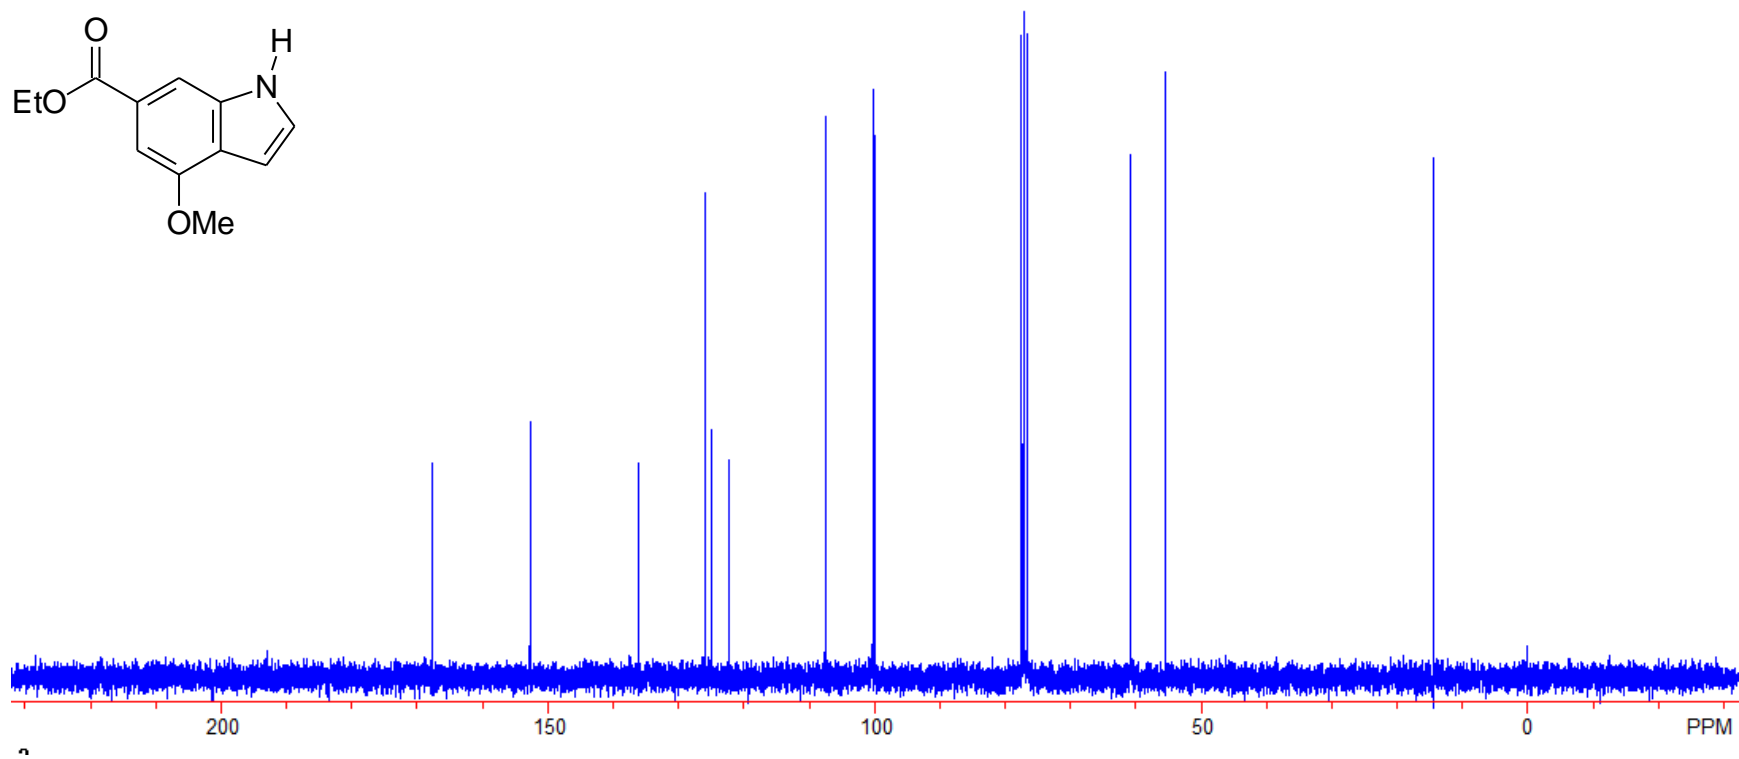

75 MHz <sup>13</sup>C NMR Spectrum for Compound 23



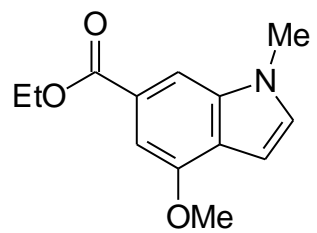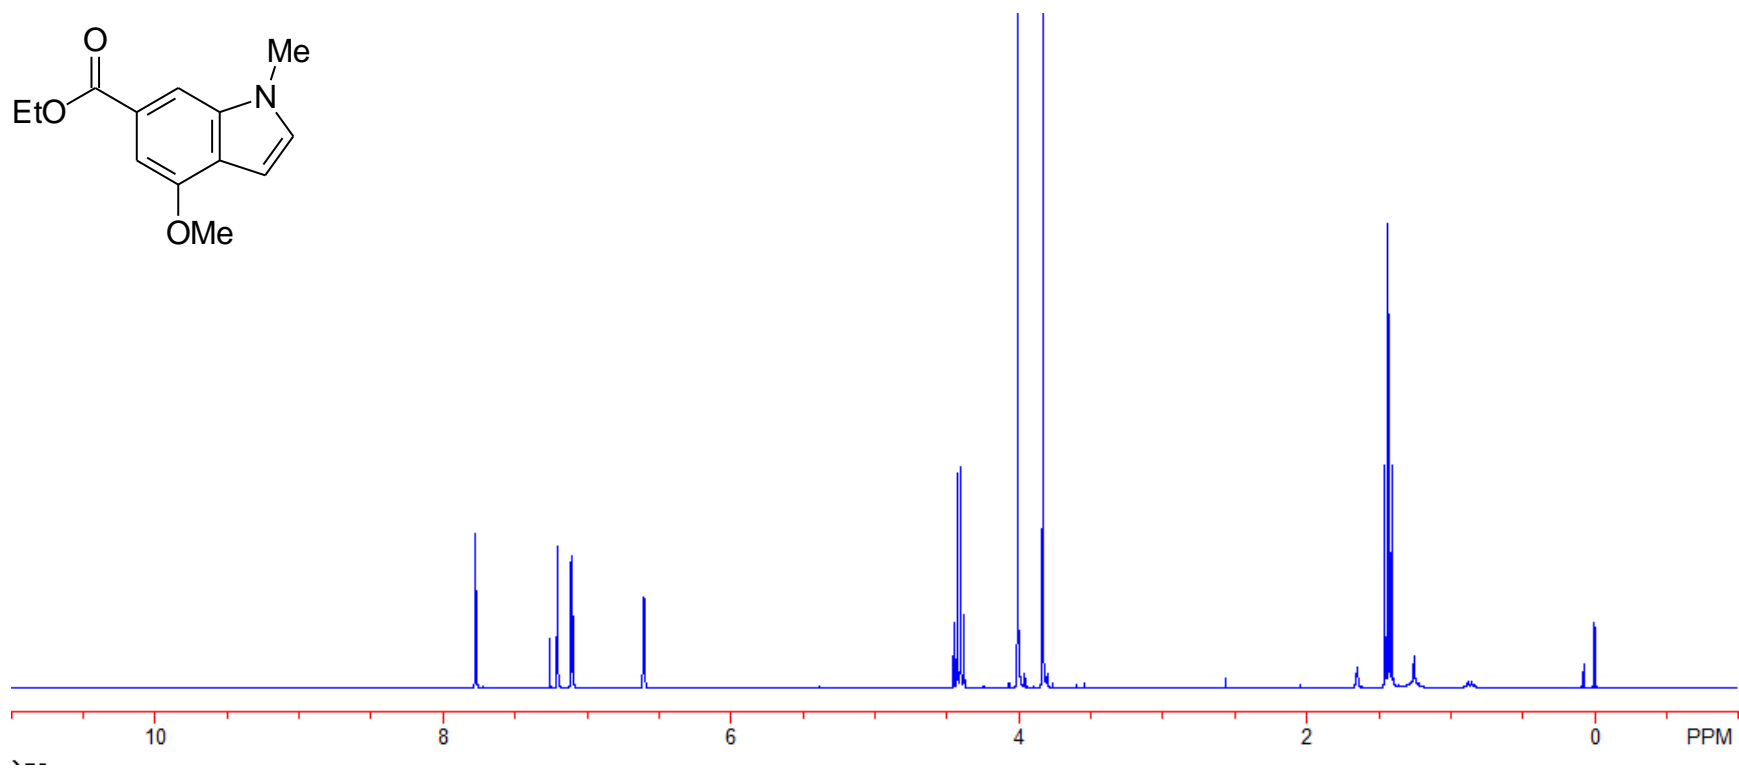

300 MHz  $^1\text{H}$  NMR Spectrum for Compound 31

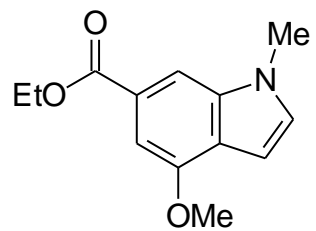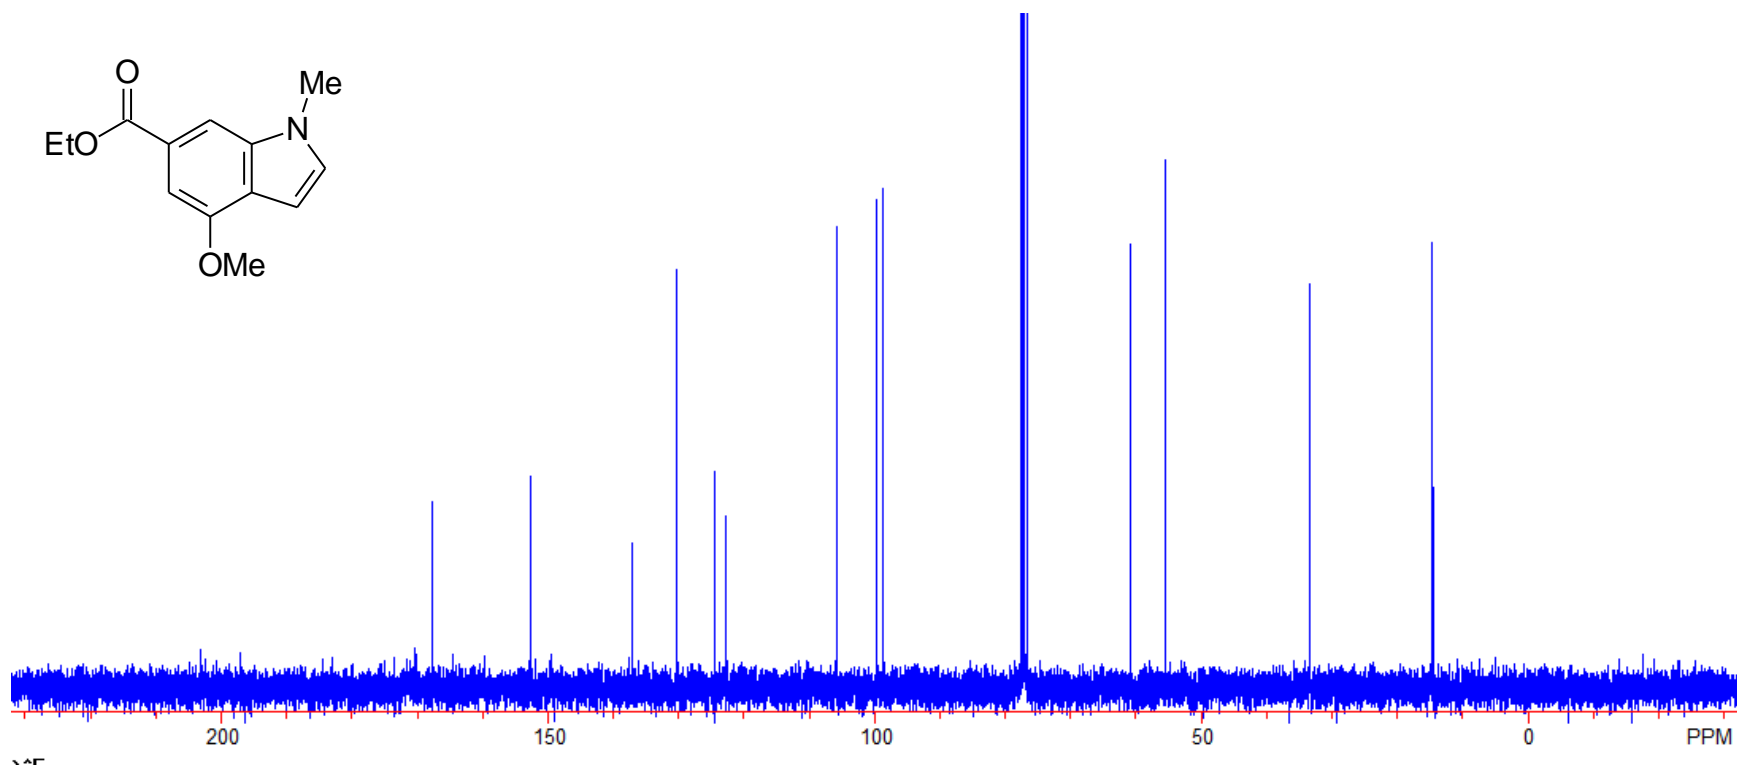

75 MHz  $^{13}\text{C}$  NMR Spectrum for Compound **31**

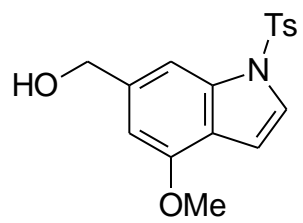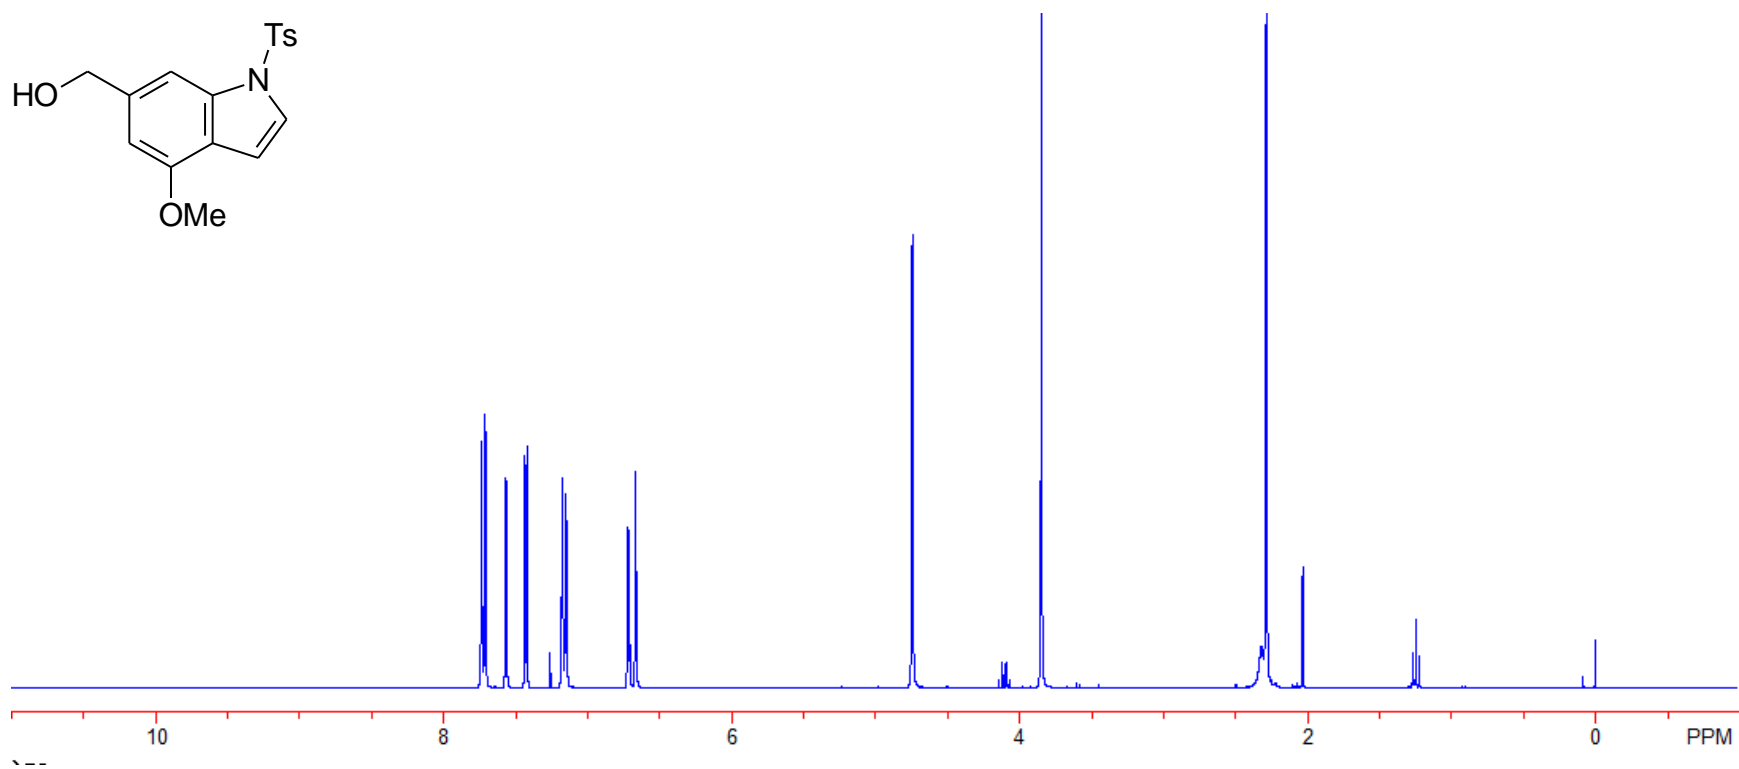

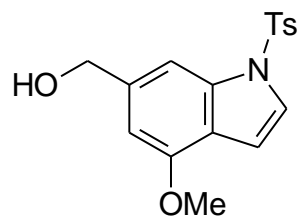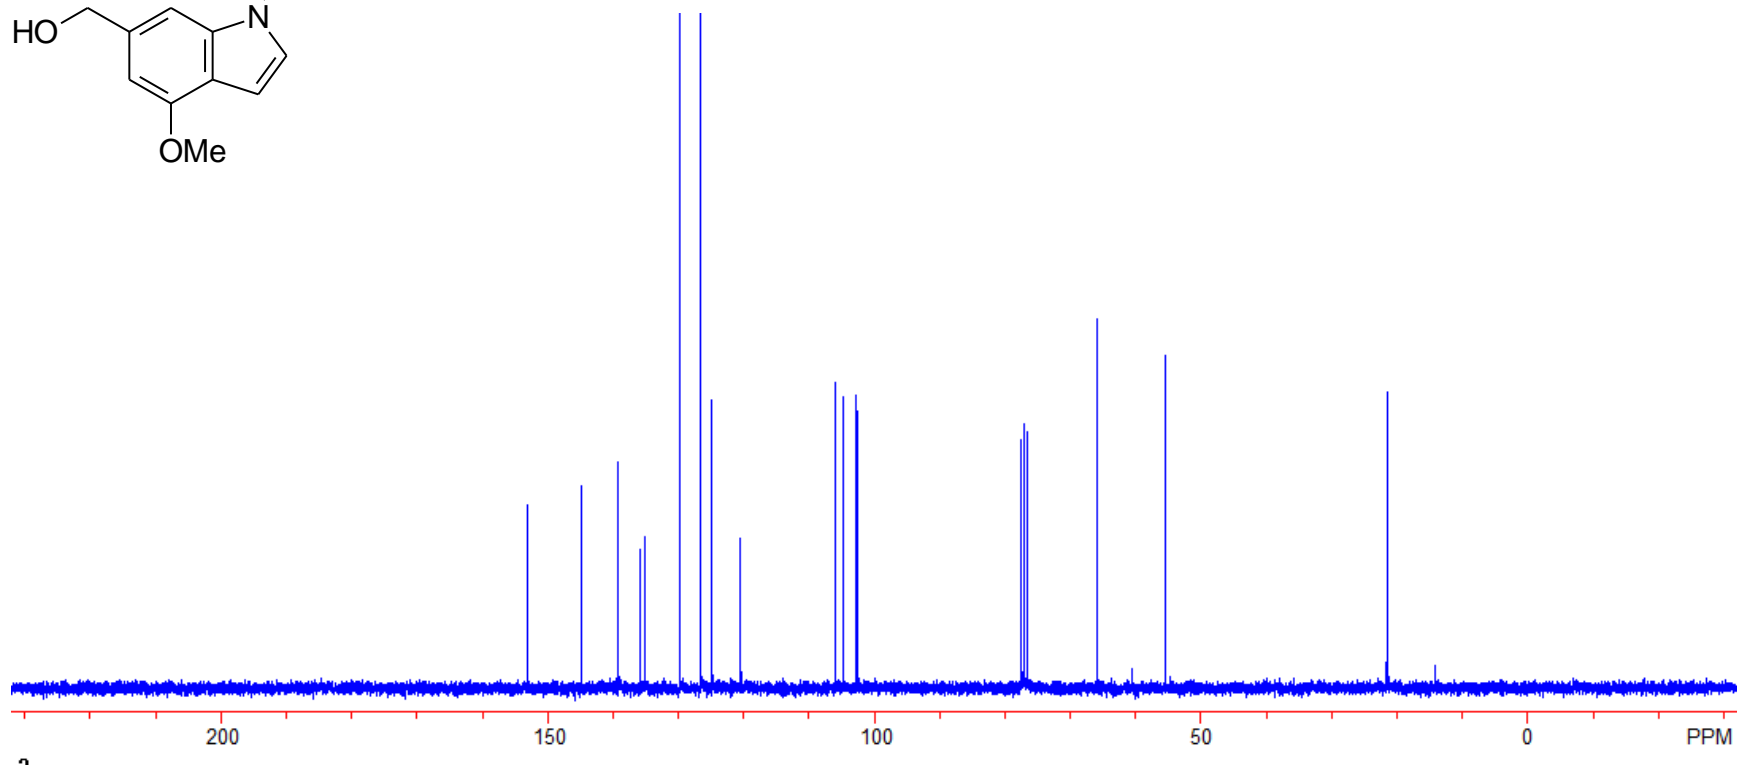

75 MHz <sup>13</sup>C NMR Spectrum for Compound 24

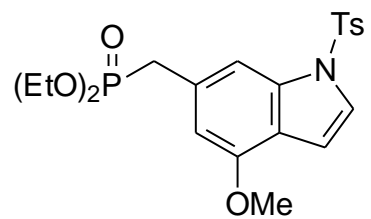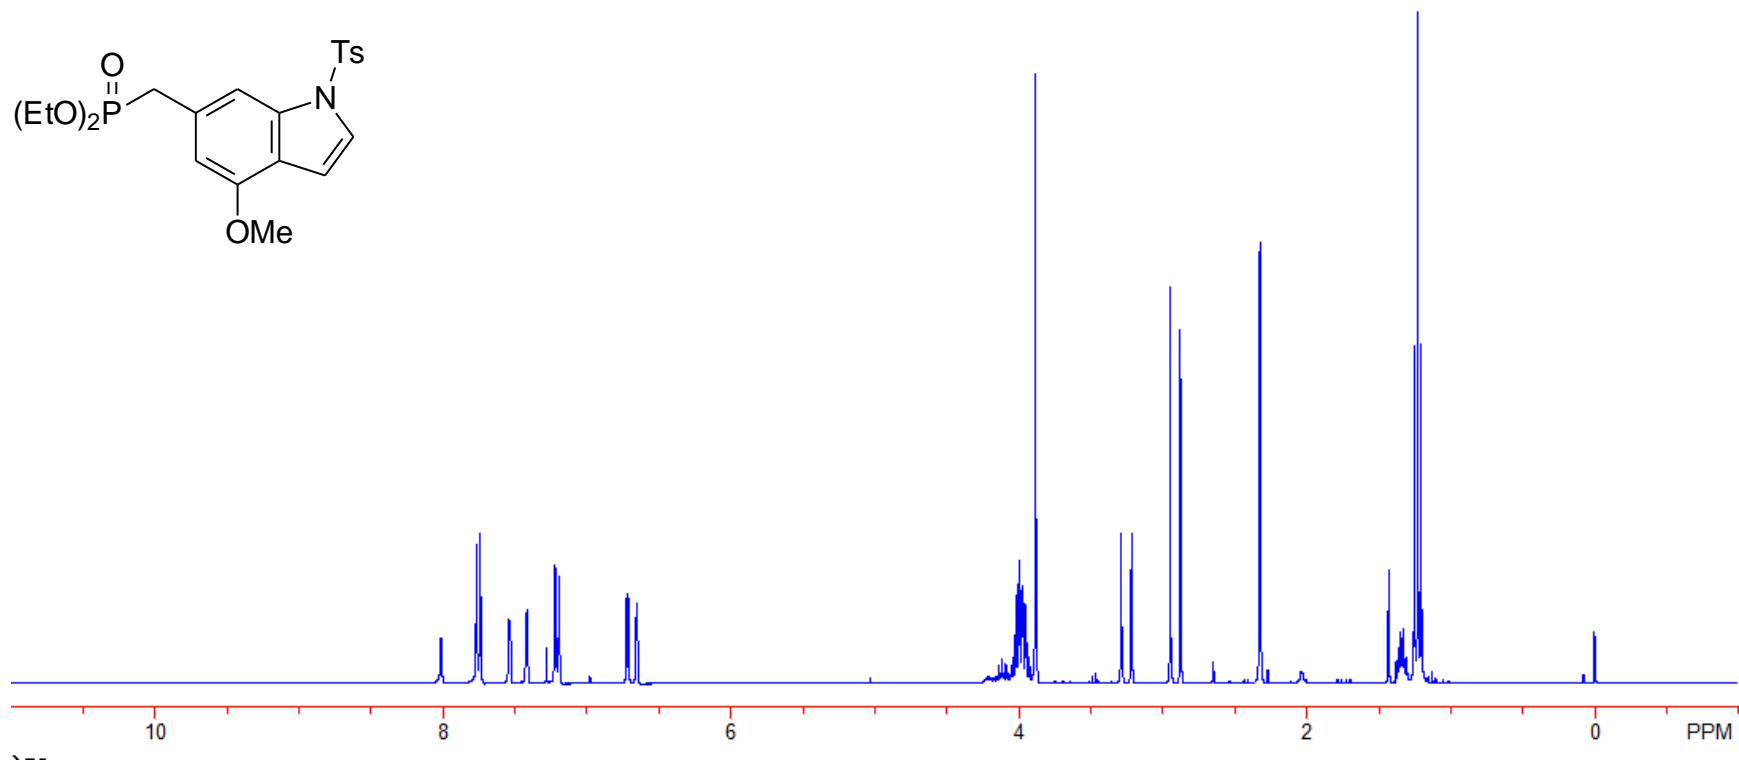

300 MHz <sup>1</sup>H NMR Spectrum for Compound 25

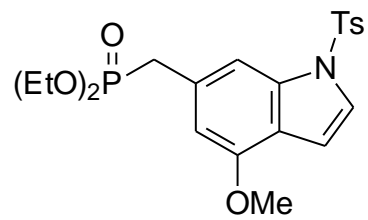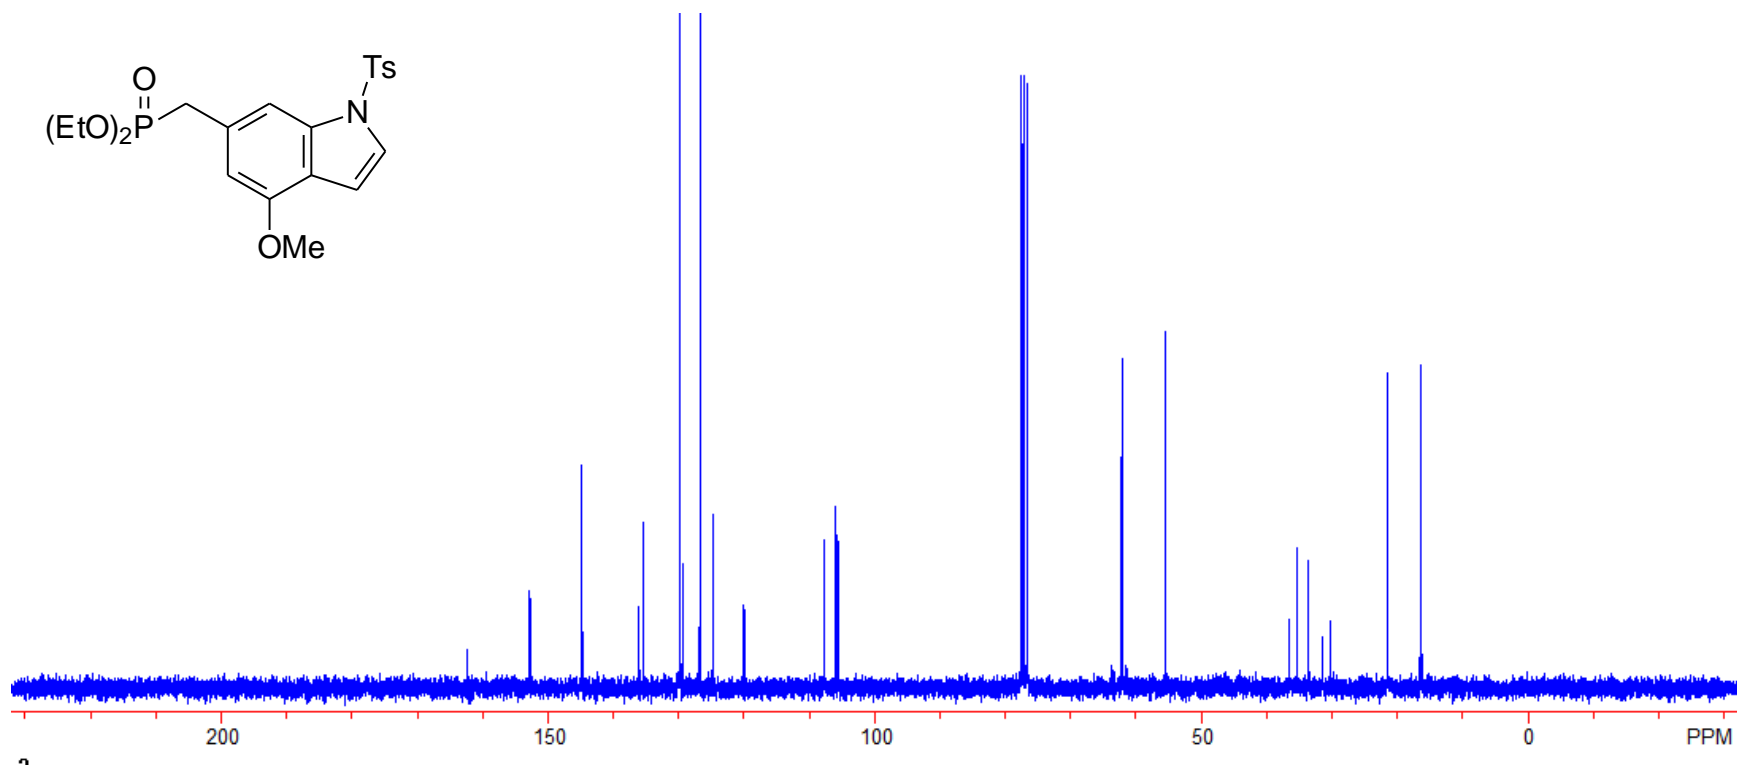

75 MHz <sup>13</sup>C NMR Spectrum for Compound 25

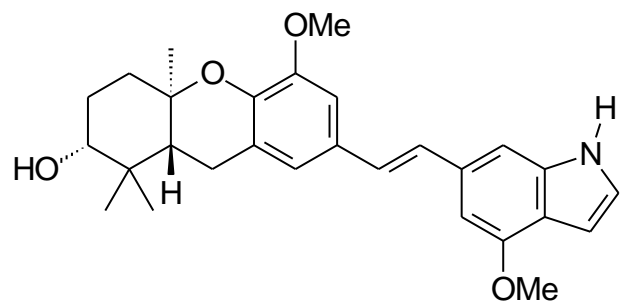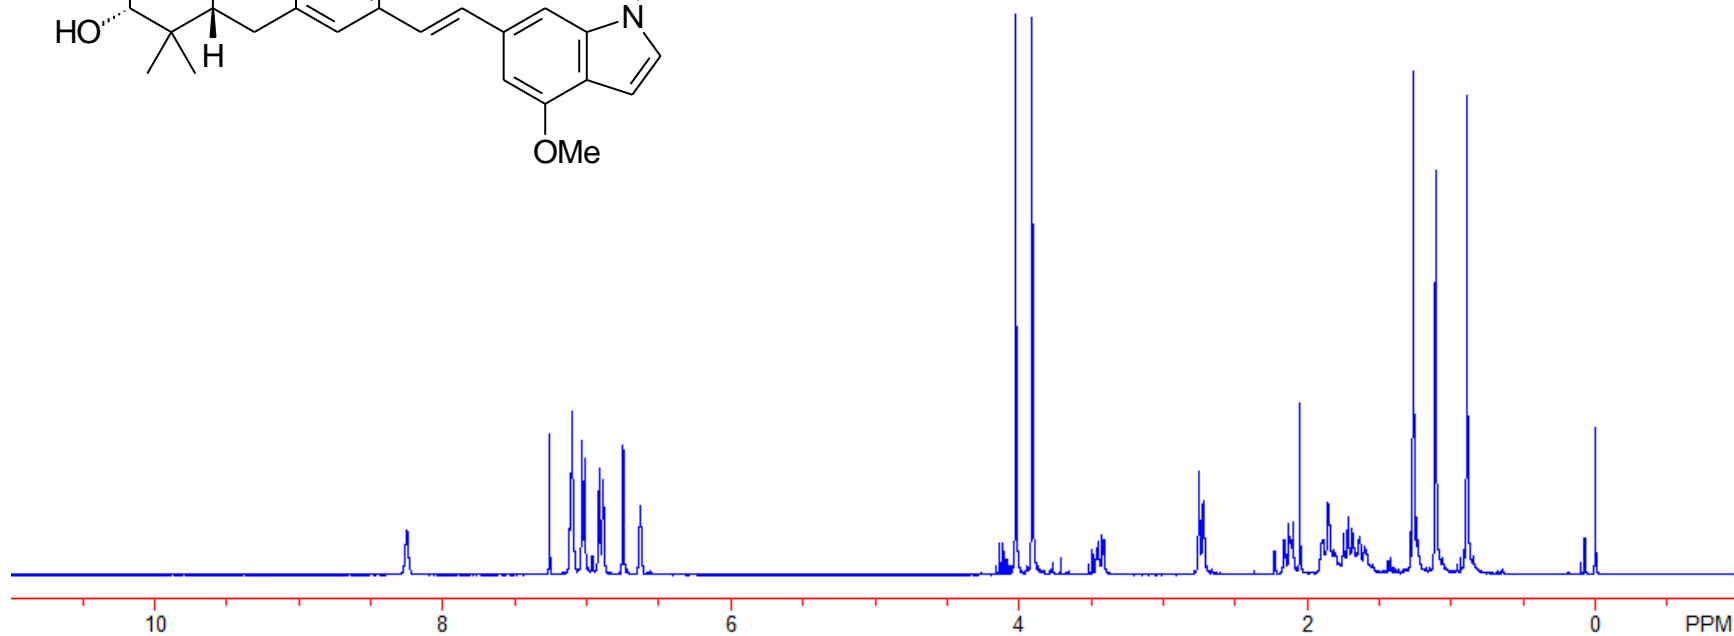

300 MHz <sup>1</sup>H NMR Spectrum for Compound 19

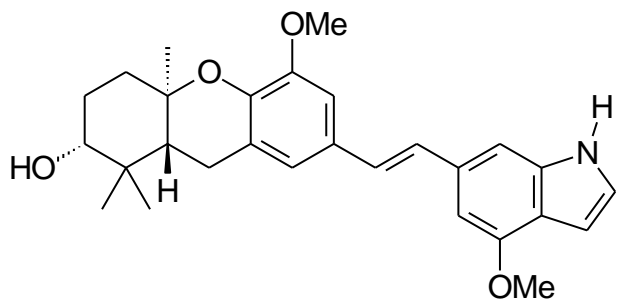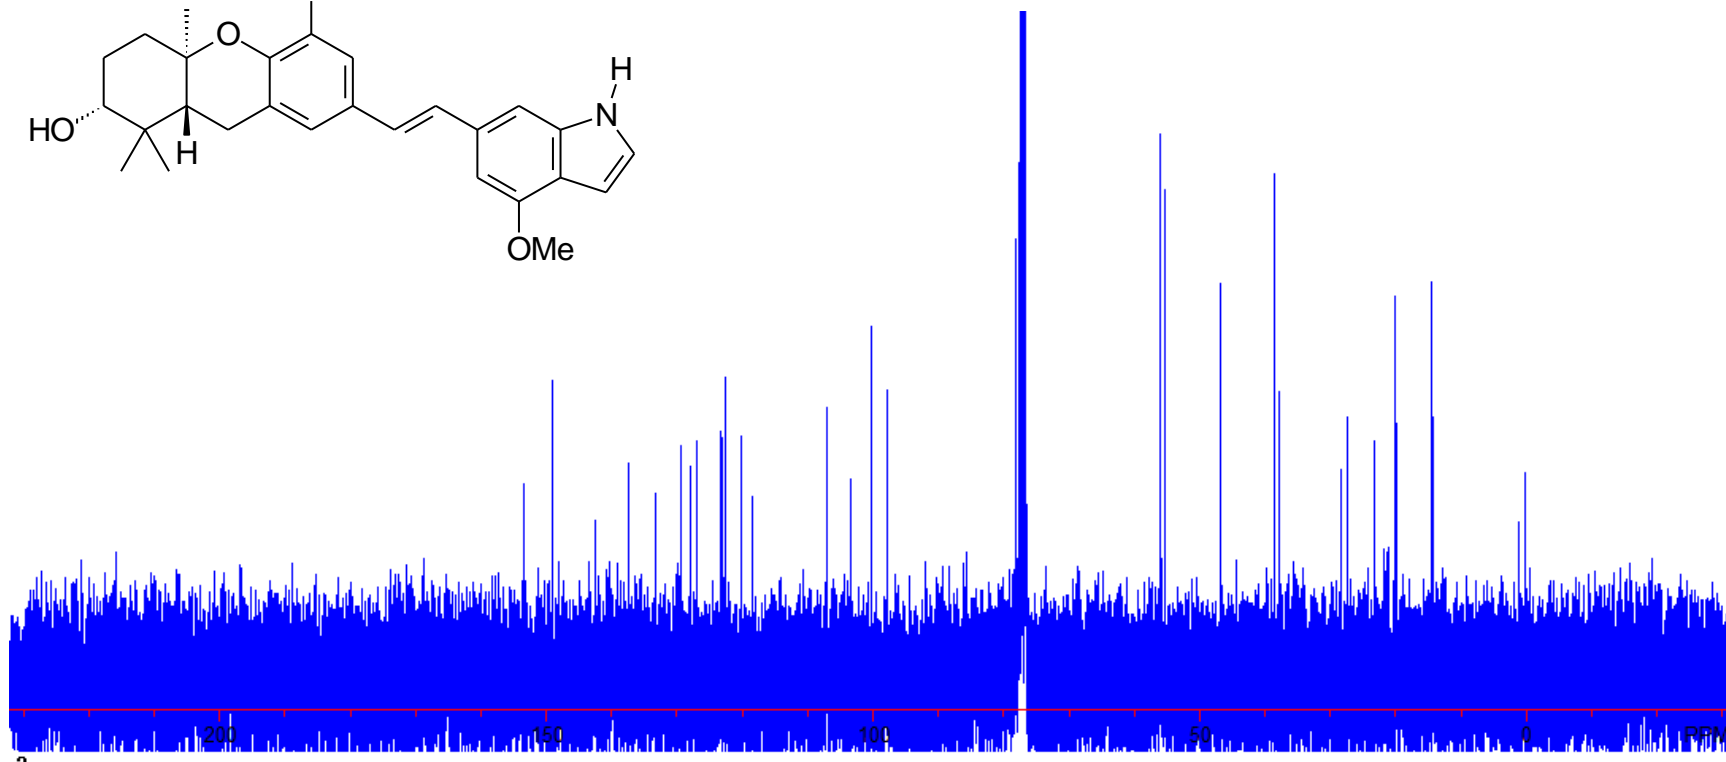

75 MHz <sup>13</sup>C NMR Spectrum for Compound 19



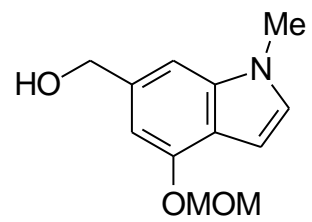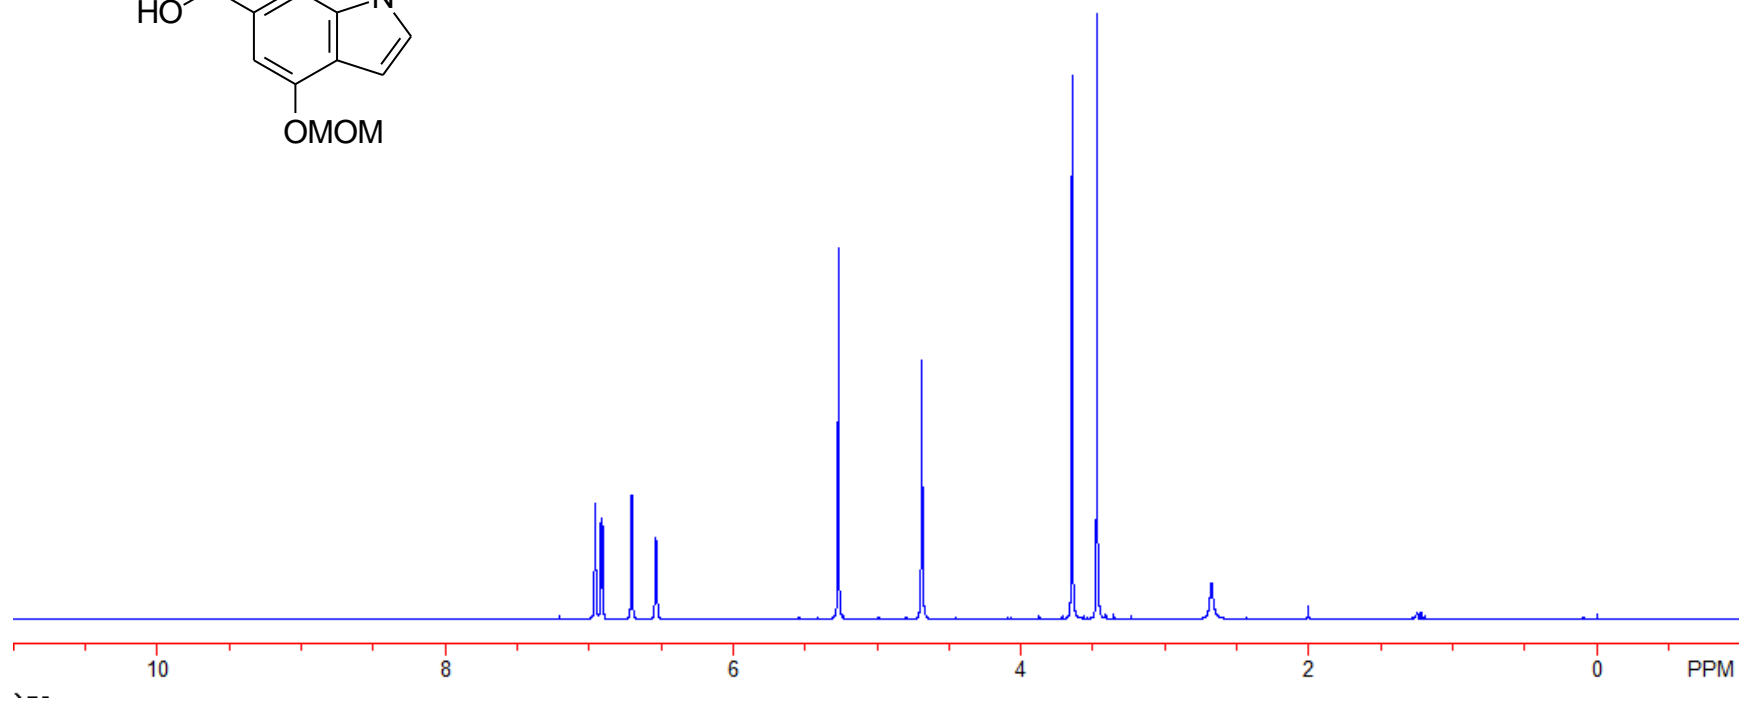

300 MHz <sup>1</sup>H NMR Spectrum for Compound **27**

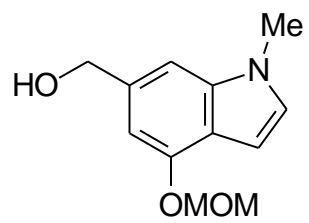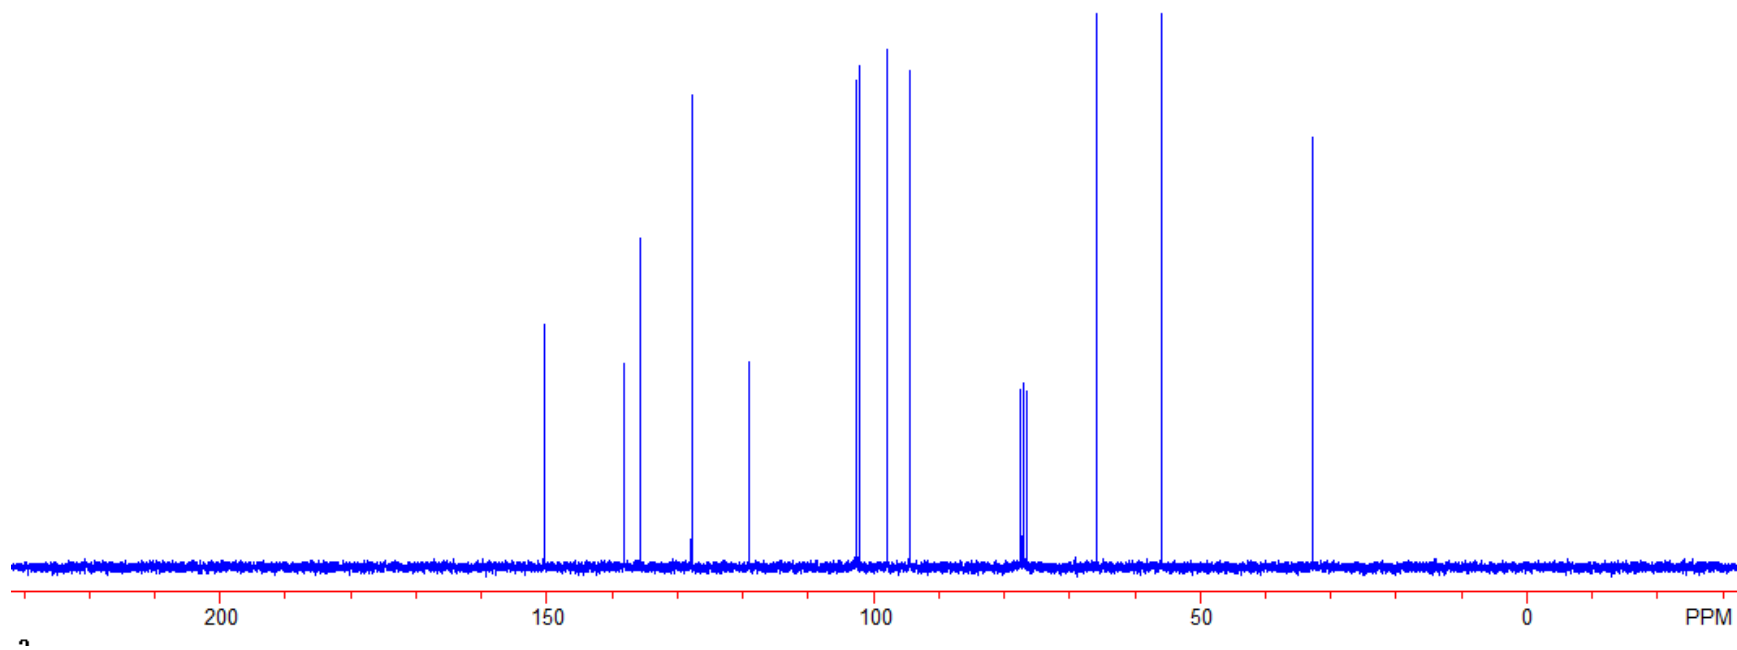

75 MHz <sup>13</sup>C NMR Spectrum for Compound 27

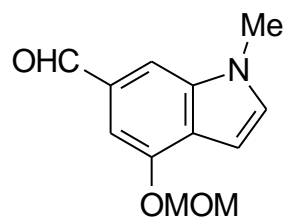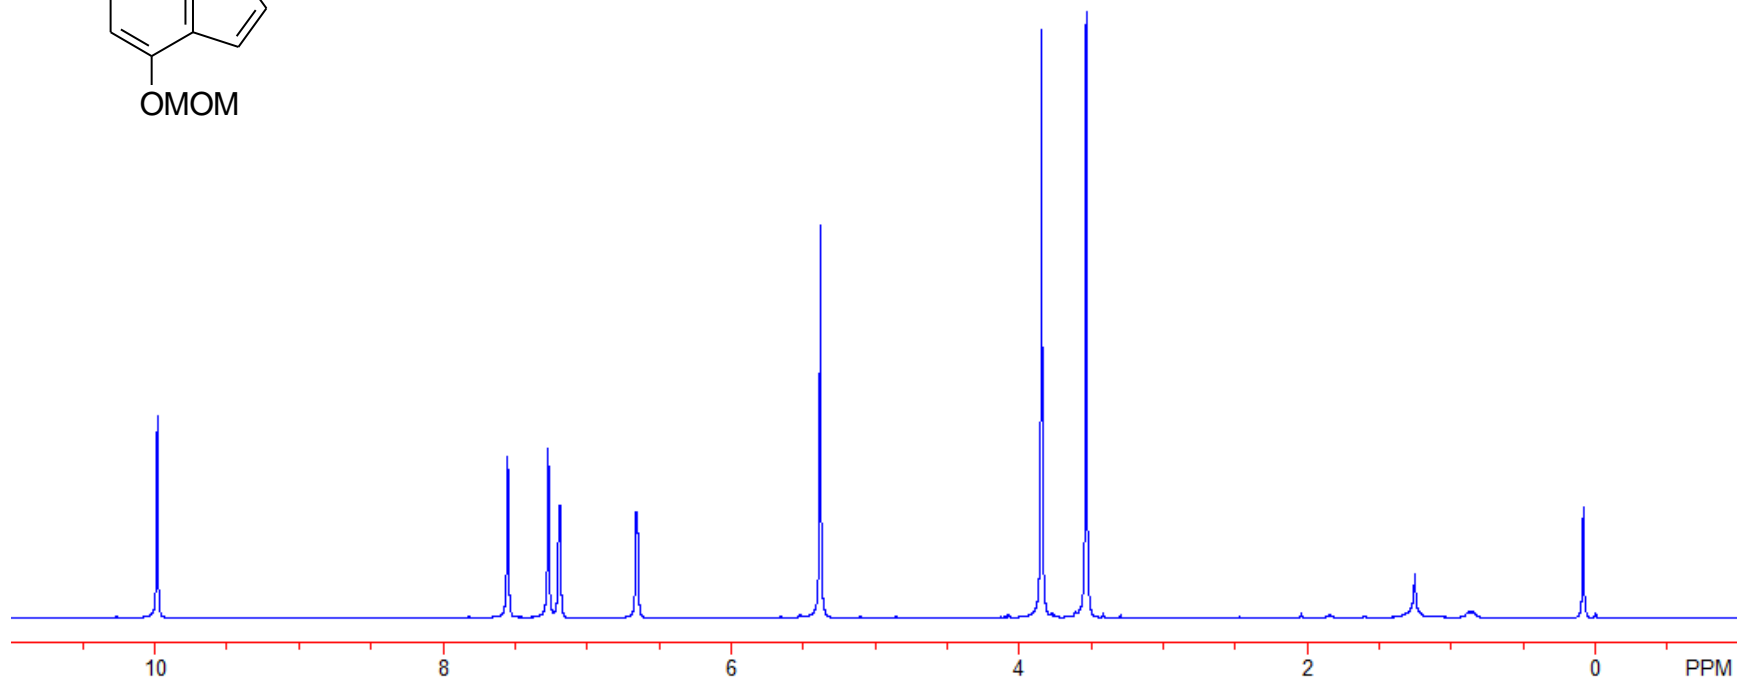

300 MHz  $^1\text{H}$  NMR Spectrum for Compound **28**

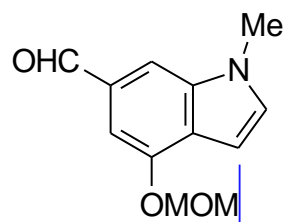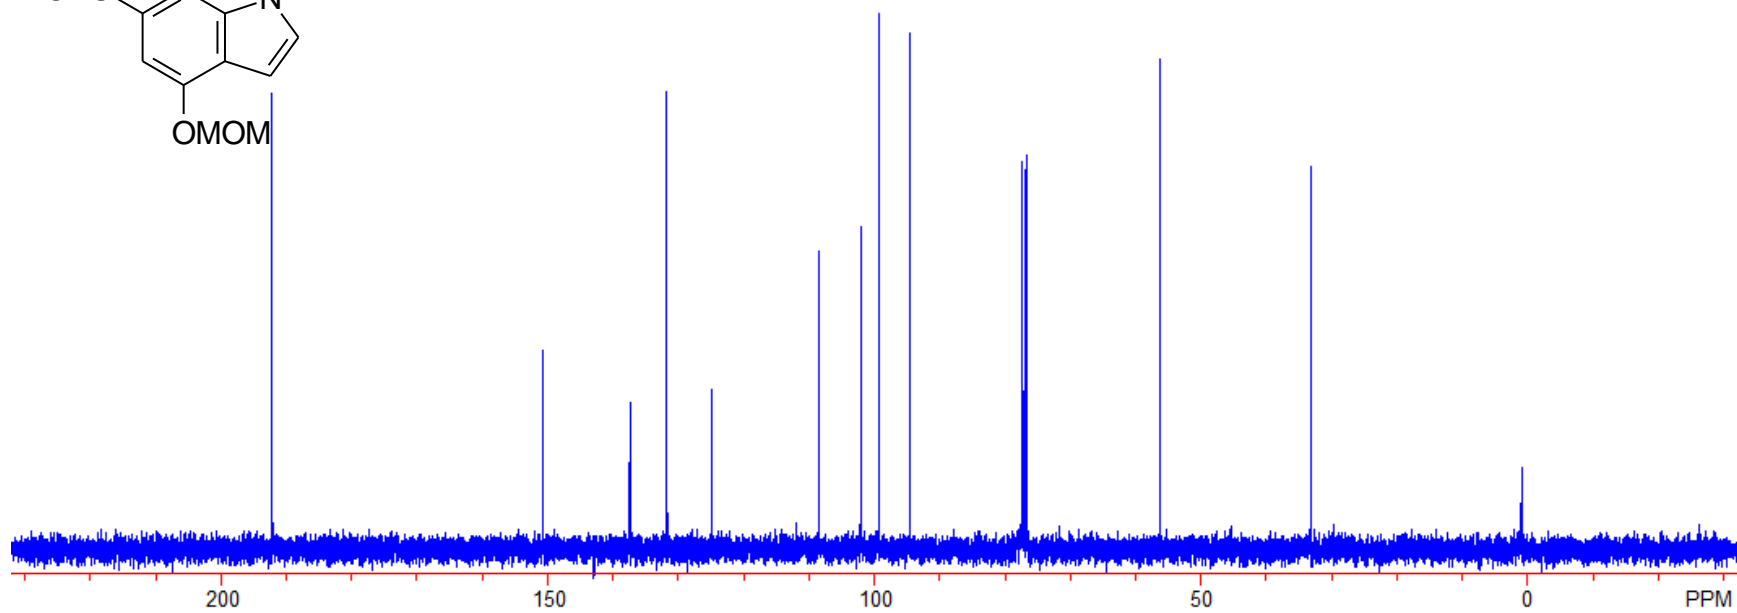

75 MHz  $^{13}\text{C}$  NMR Spectrum for Compound 28

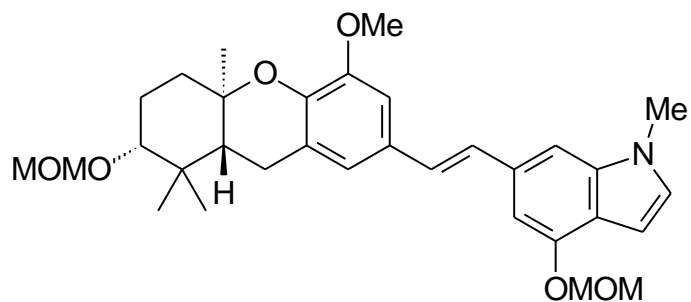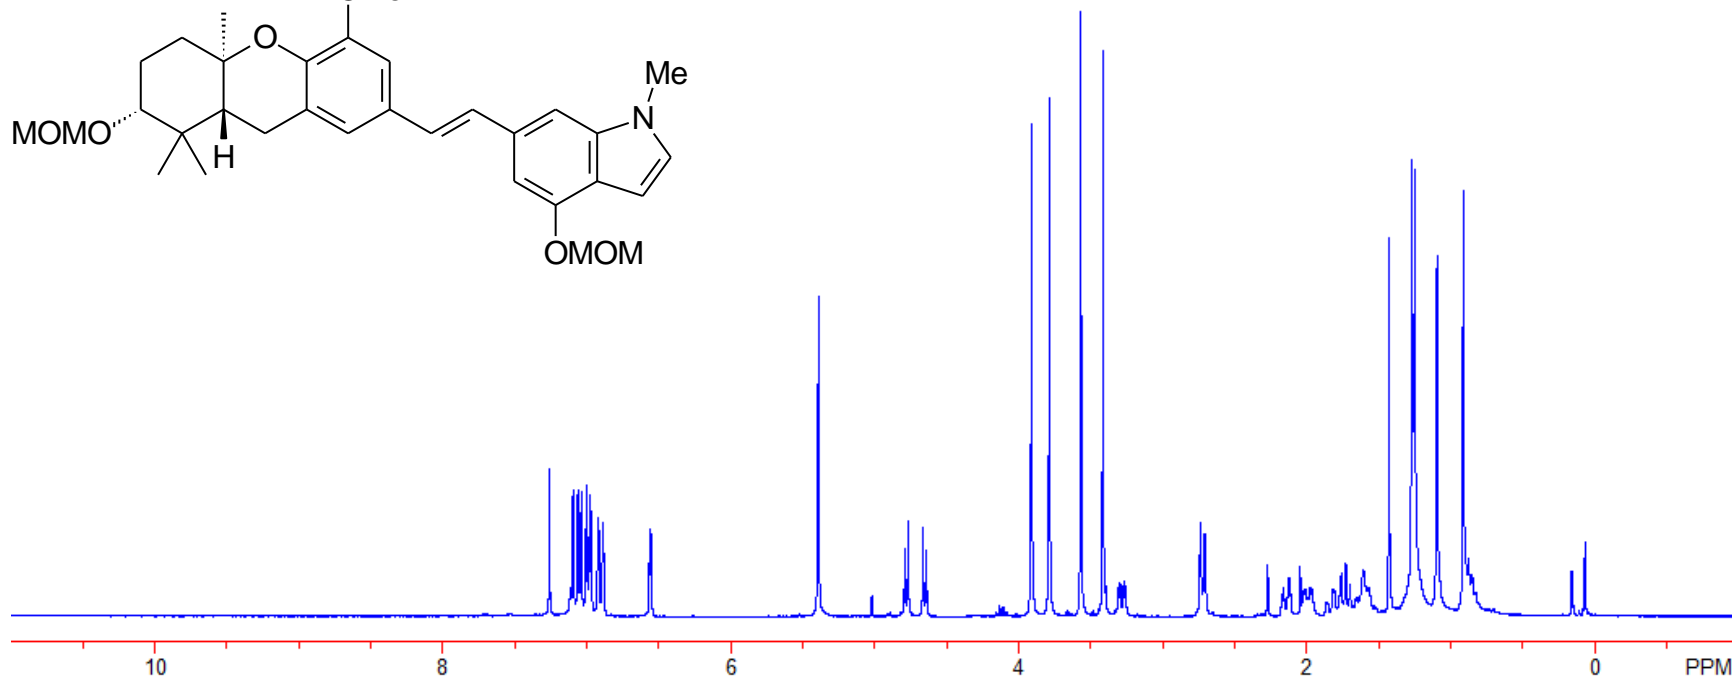

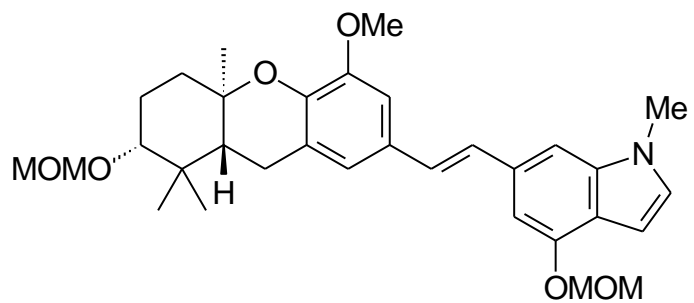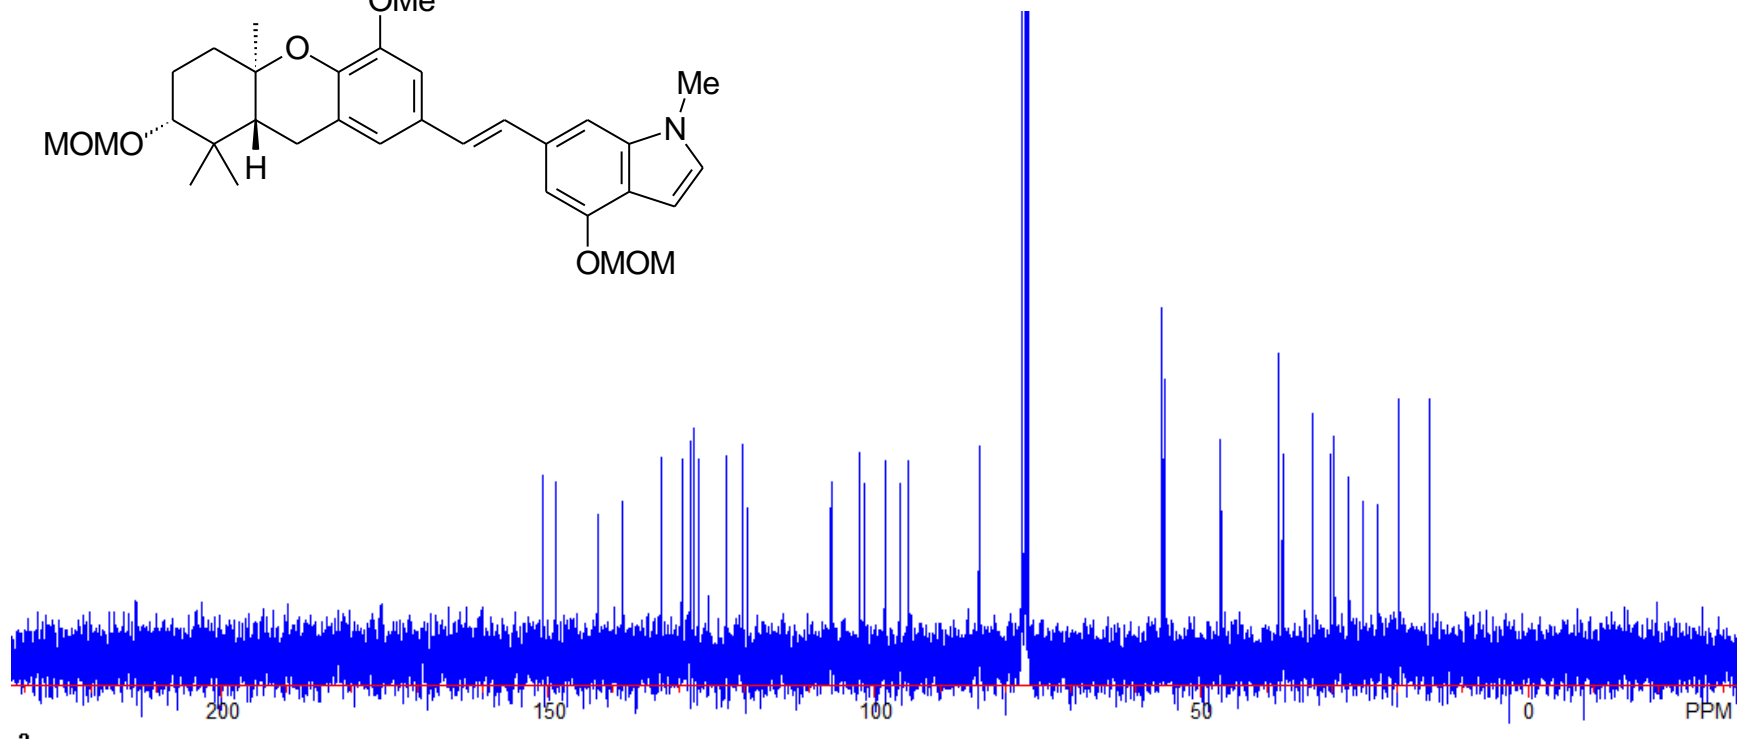

75 MHz <sup>13</sup>C NMR Spectrum for Compound 30

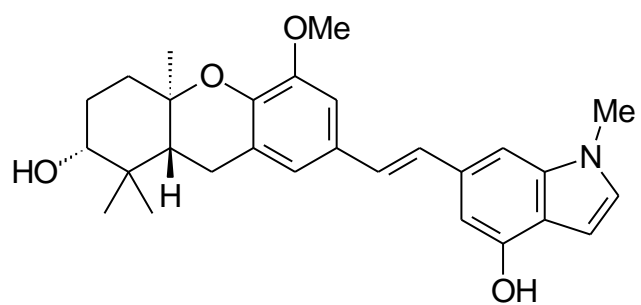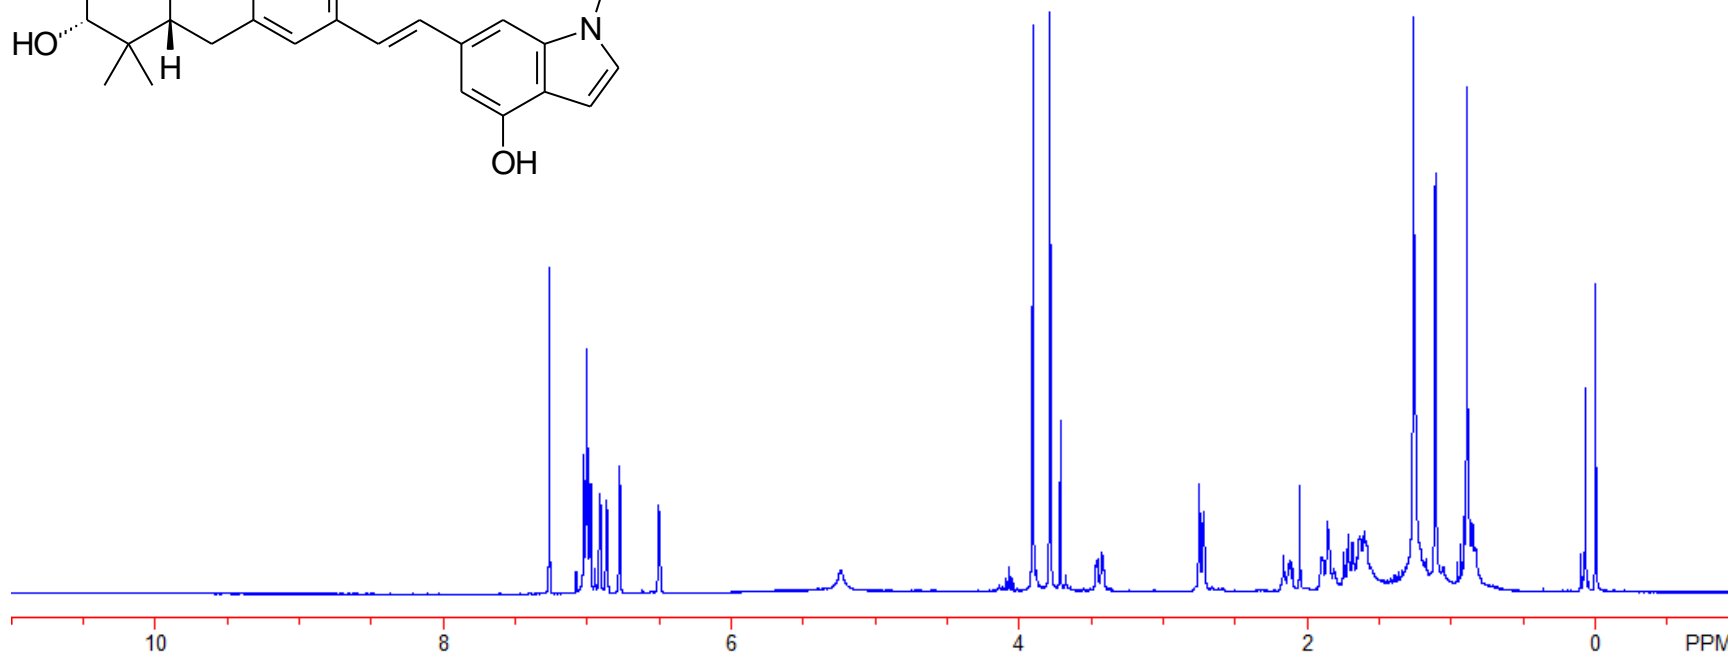

300 MHz <sup>1</sup>H NMR Spectrum for Compound **20**

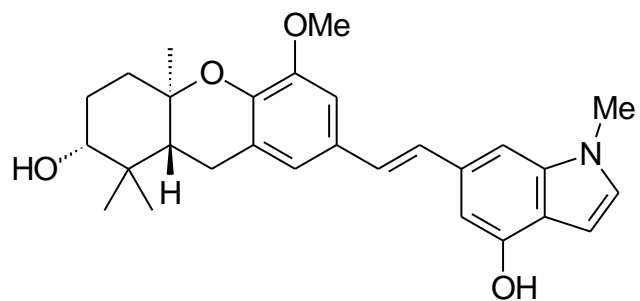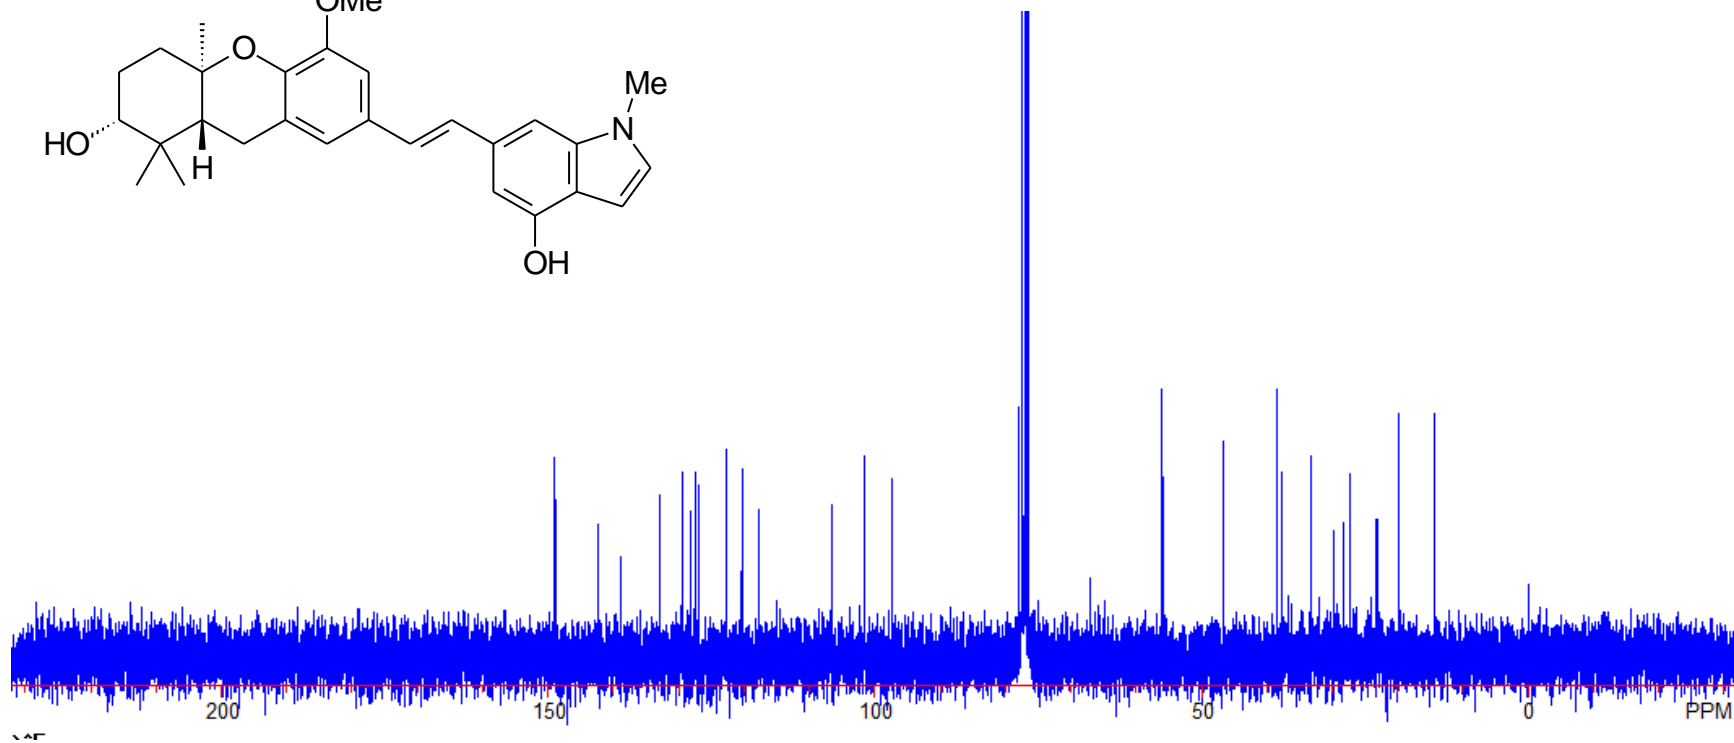

75 MHz  $^{13}\text{C}$  NMR Spectrum for Compound 20



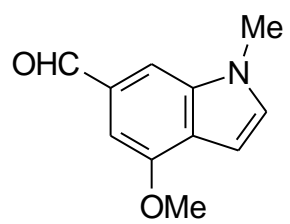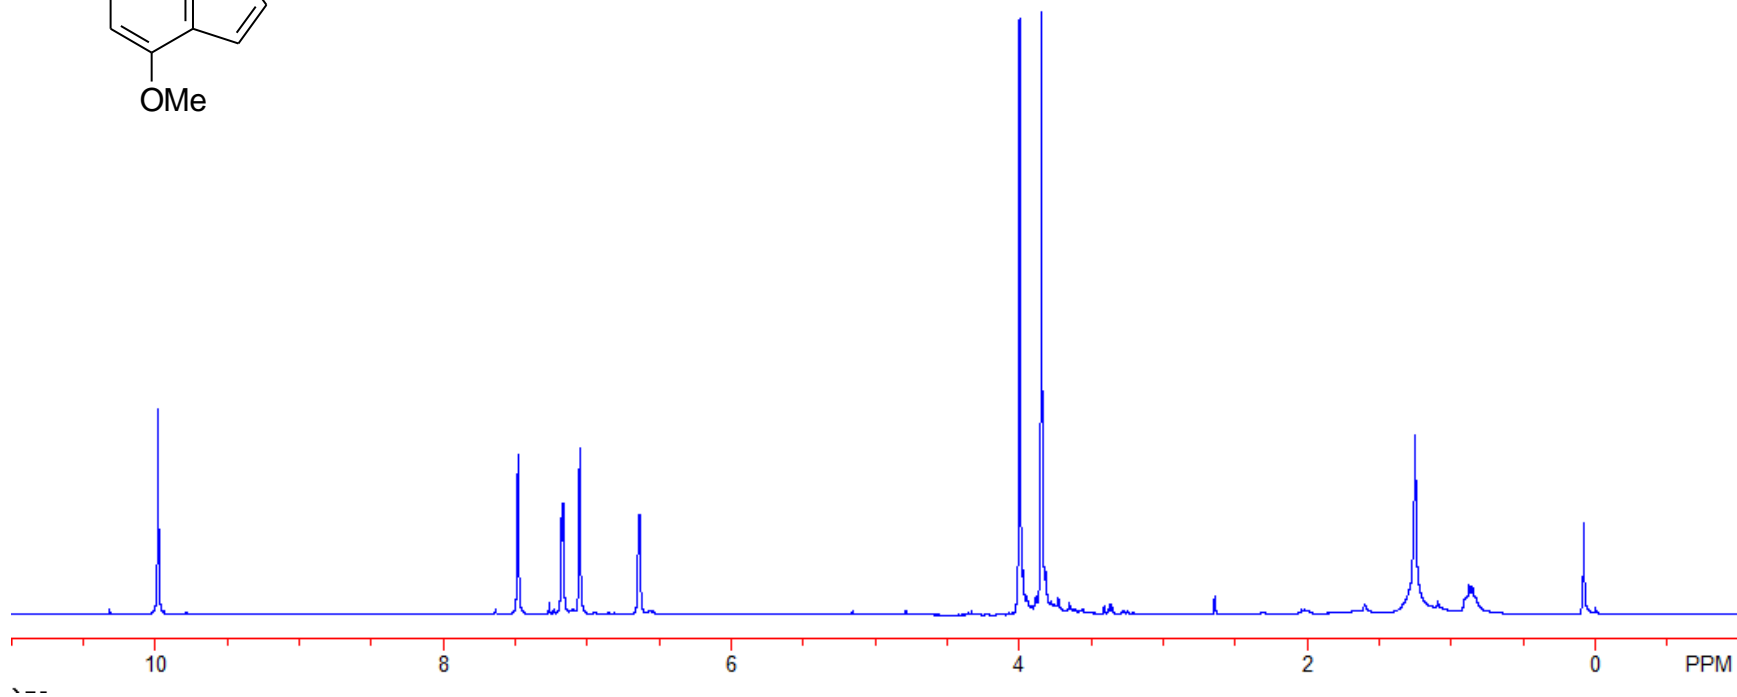

300 MHz  $^1\text{H}$  NMR Spectrum for Compound **32**

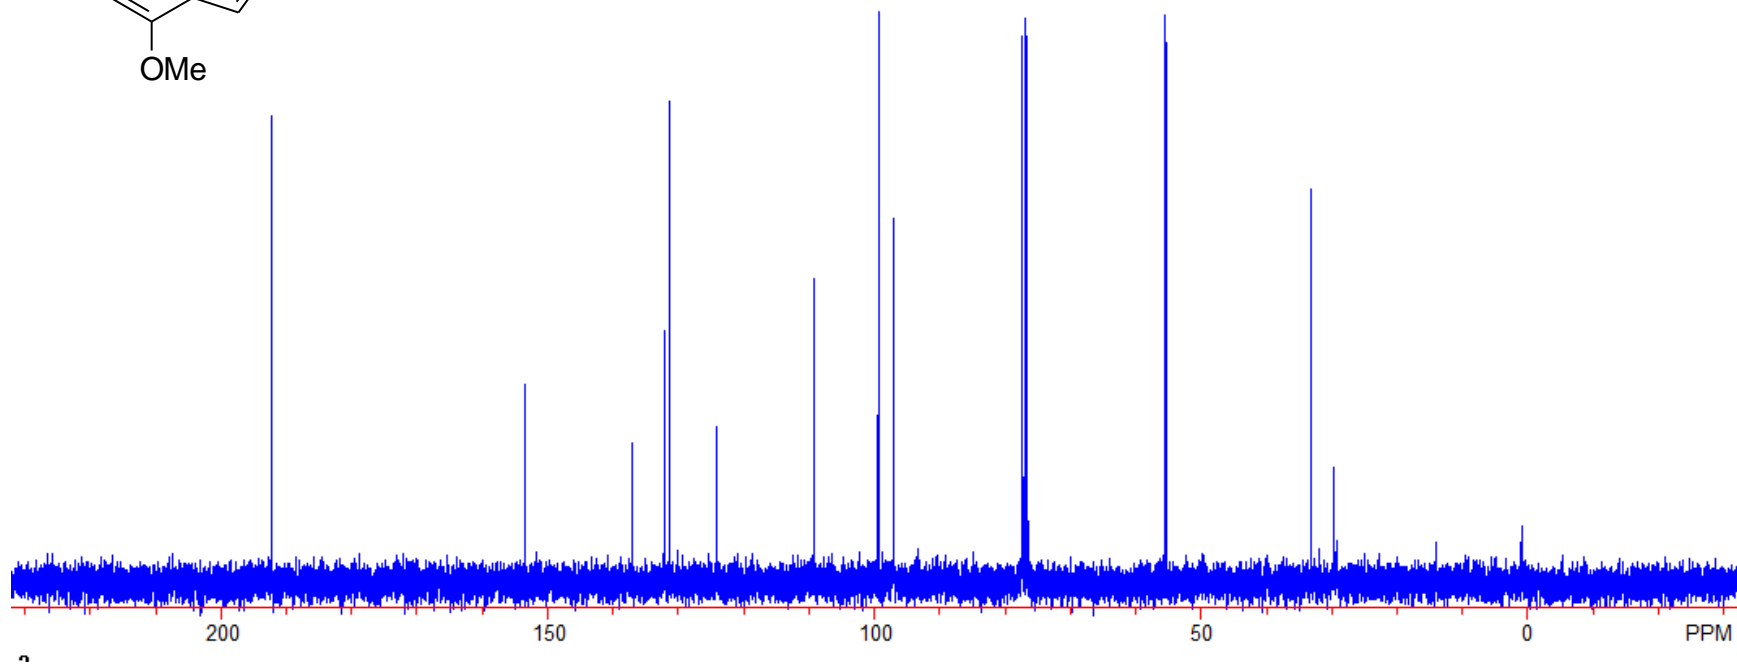

75 MHz <sup>13</sup>C NMR Spectrum for Compound 32

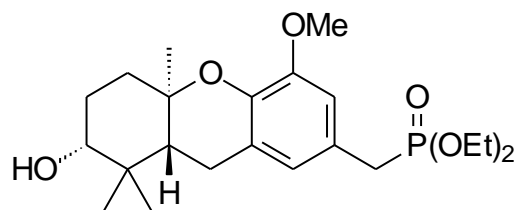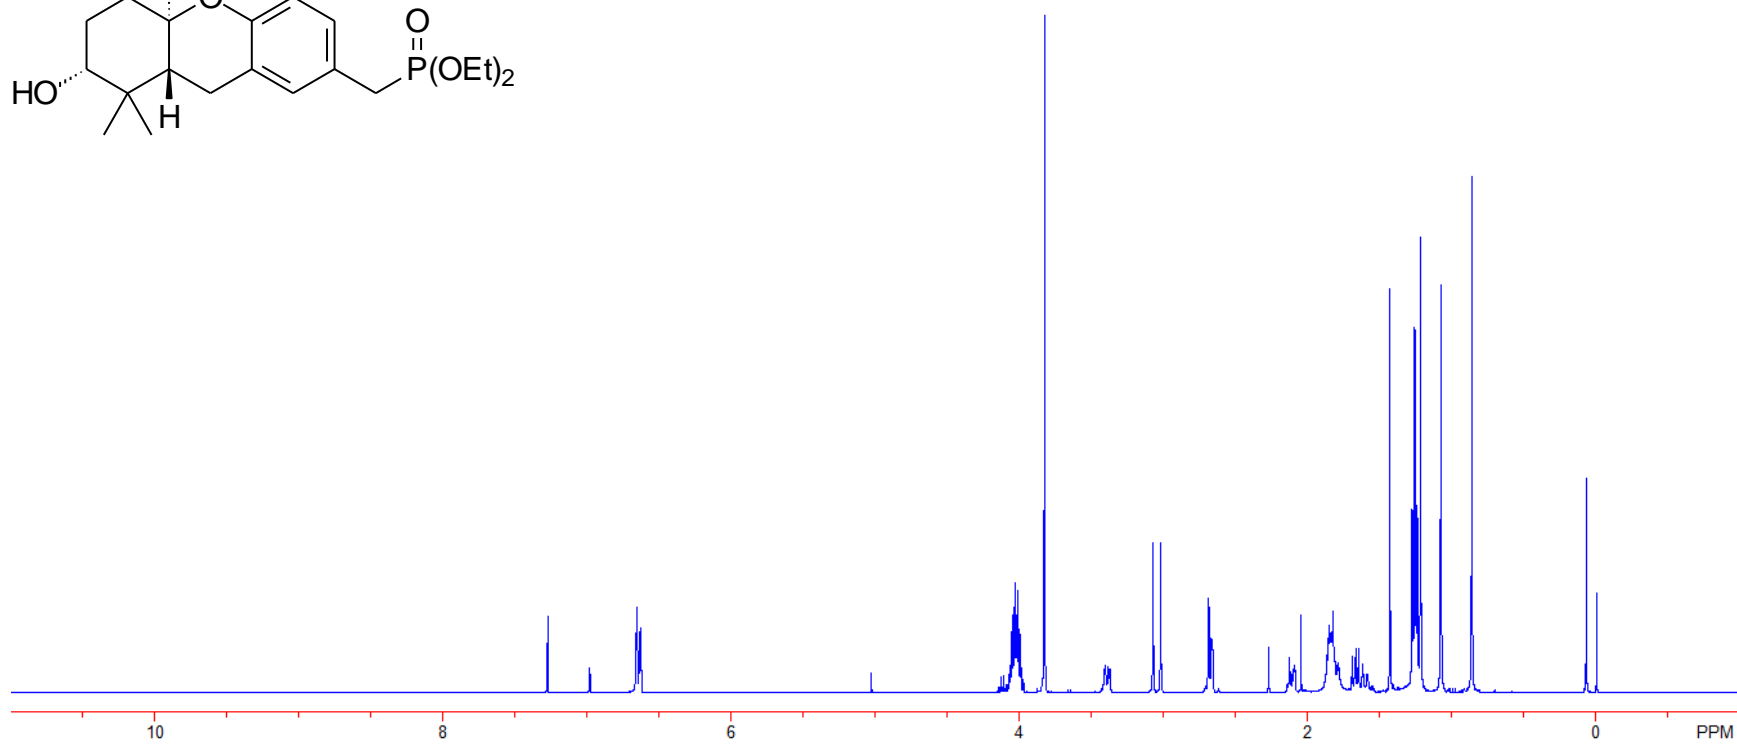

300 MHz <sup>1</sup>H NMR Spectrum for Compound 33

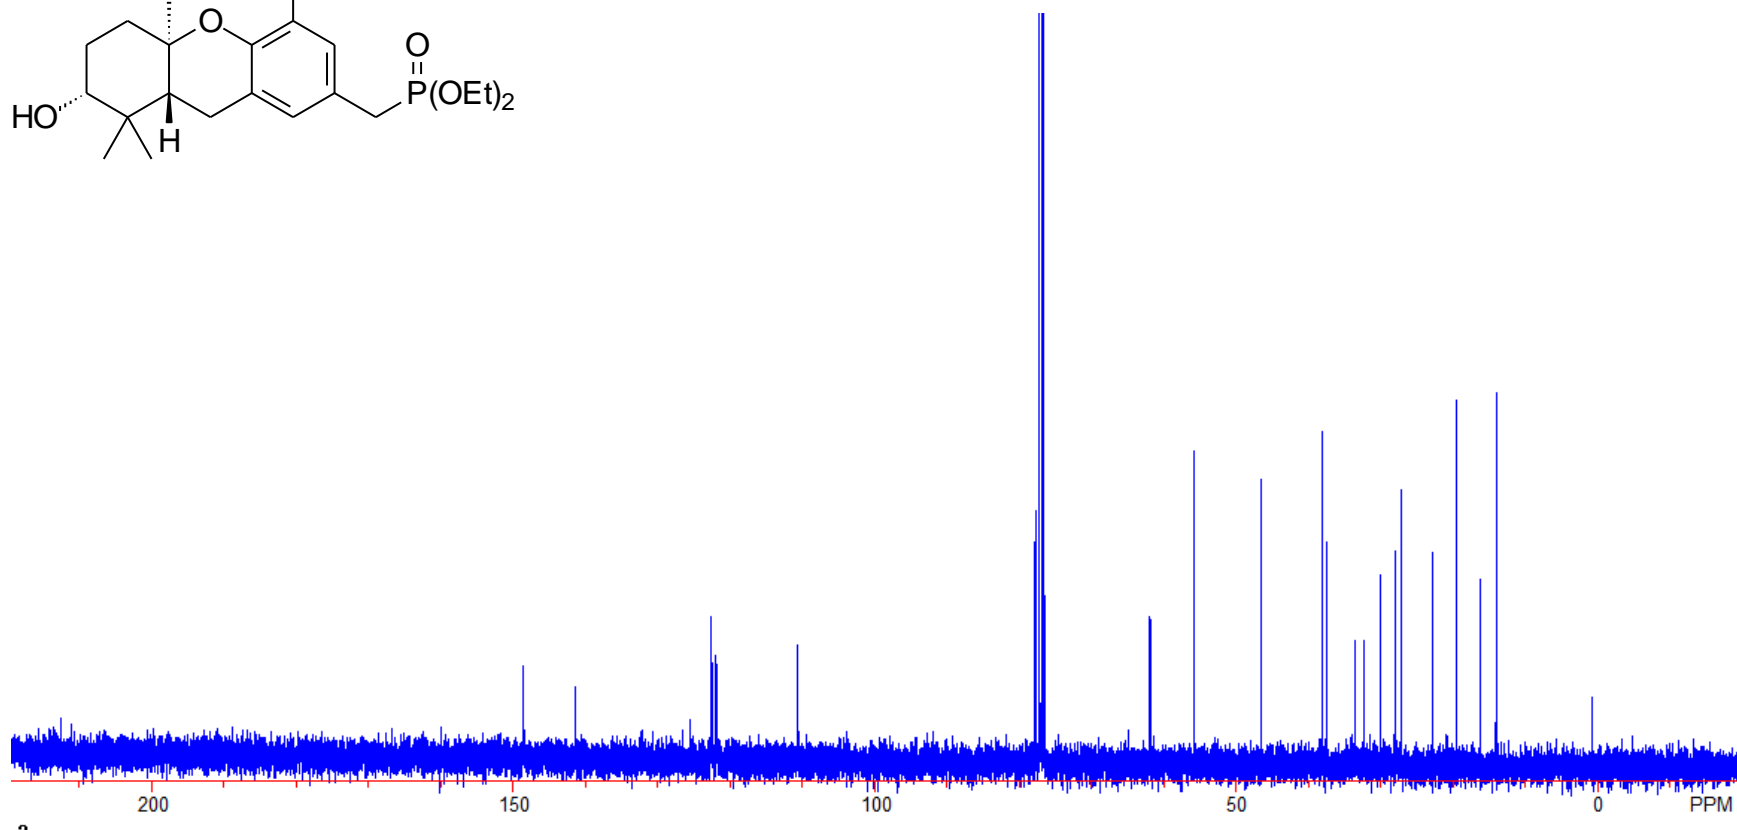

75 MHz <sup>13</sup>C NMR Spectrum for Compound 33

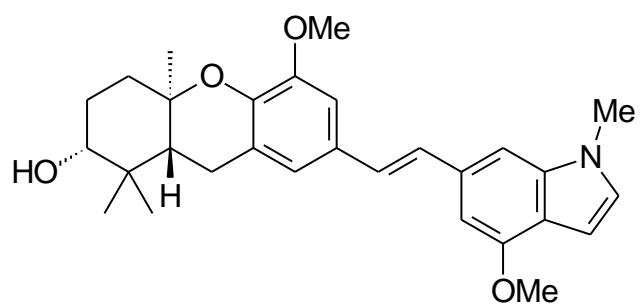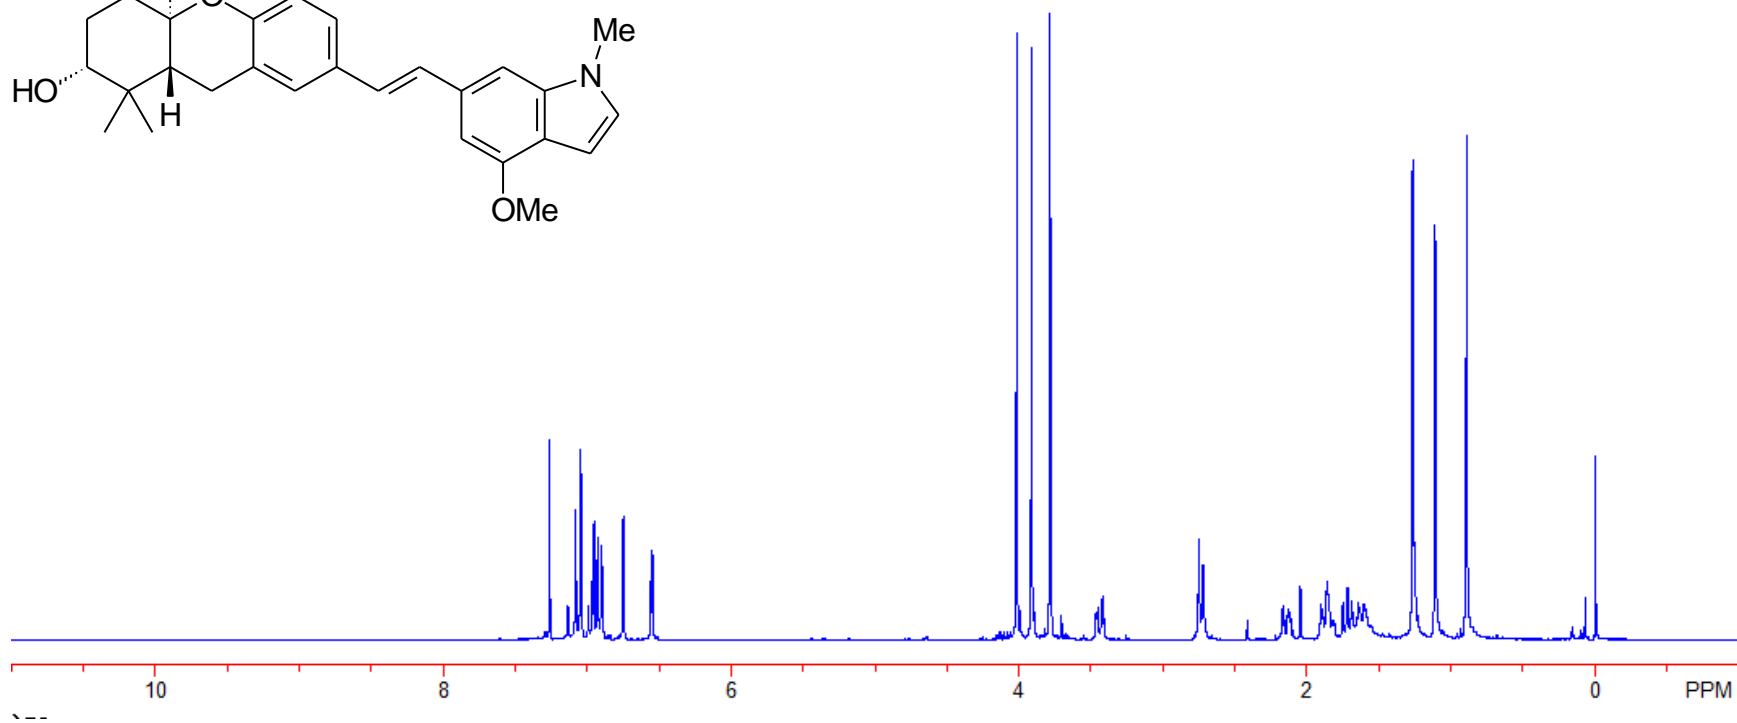

300 MHz <sup>1</sup>H NMR Spectrum for Compound 21

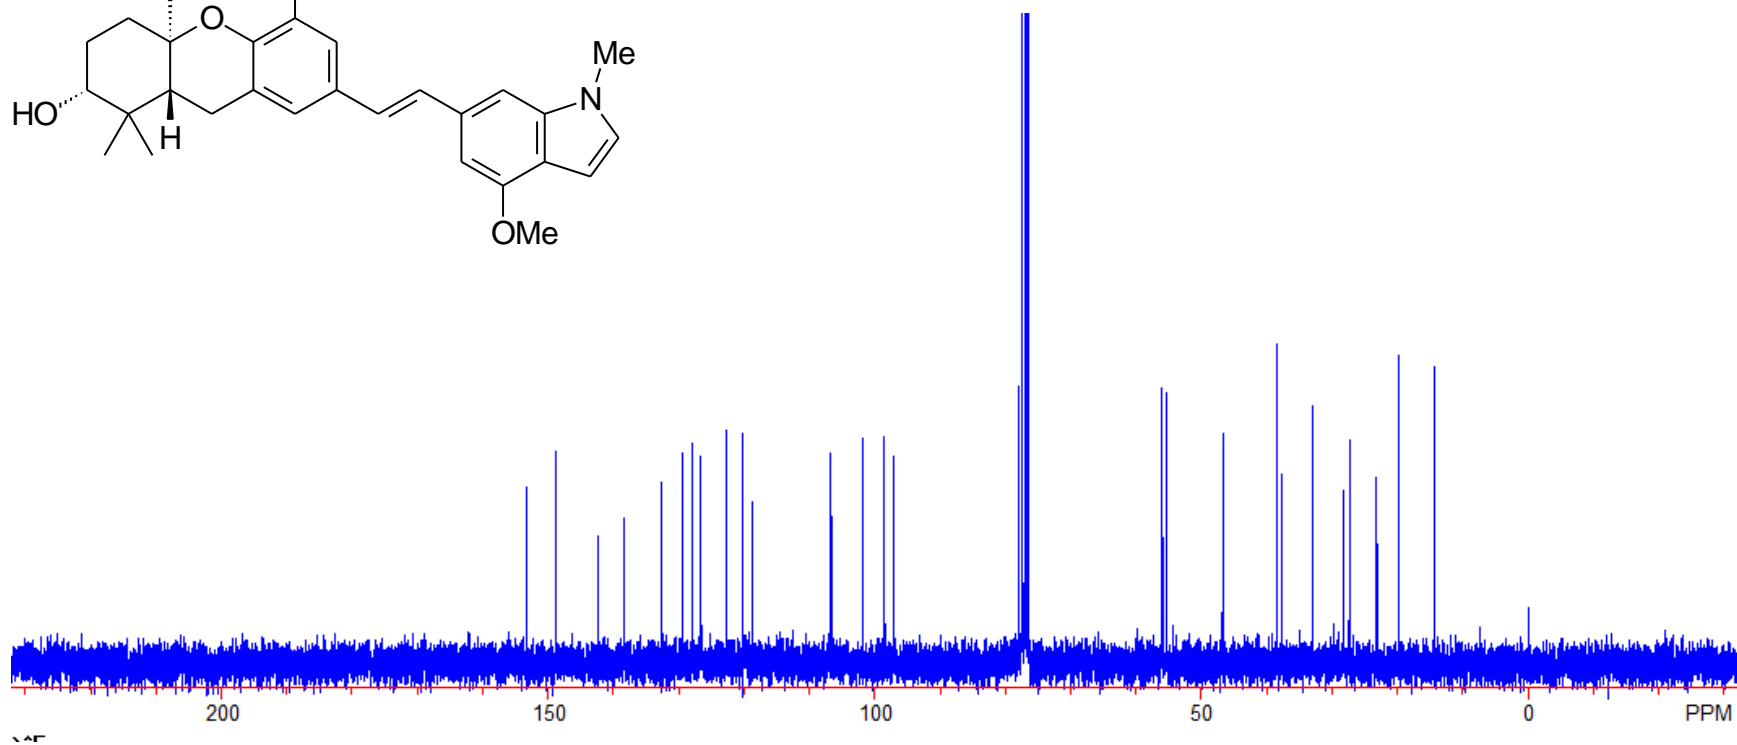

75 MHz  $^{13}\text{C}$  NMR Spectrum for Compound 21

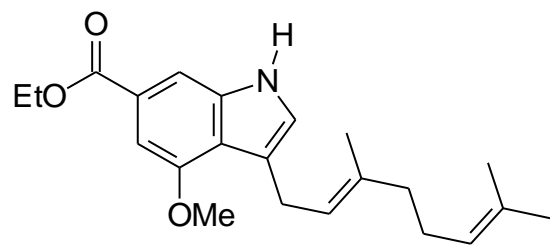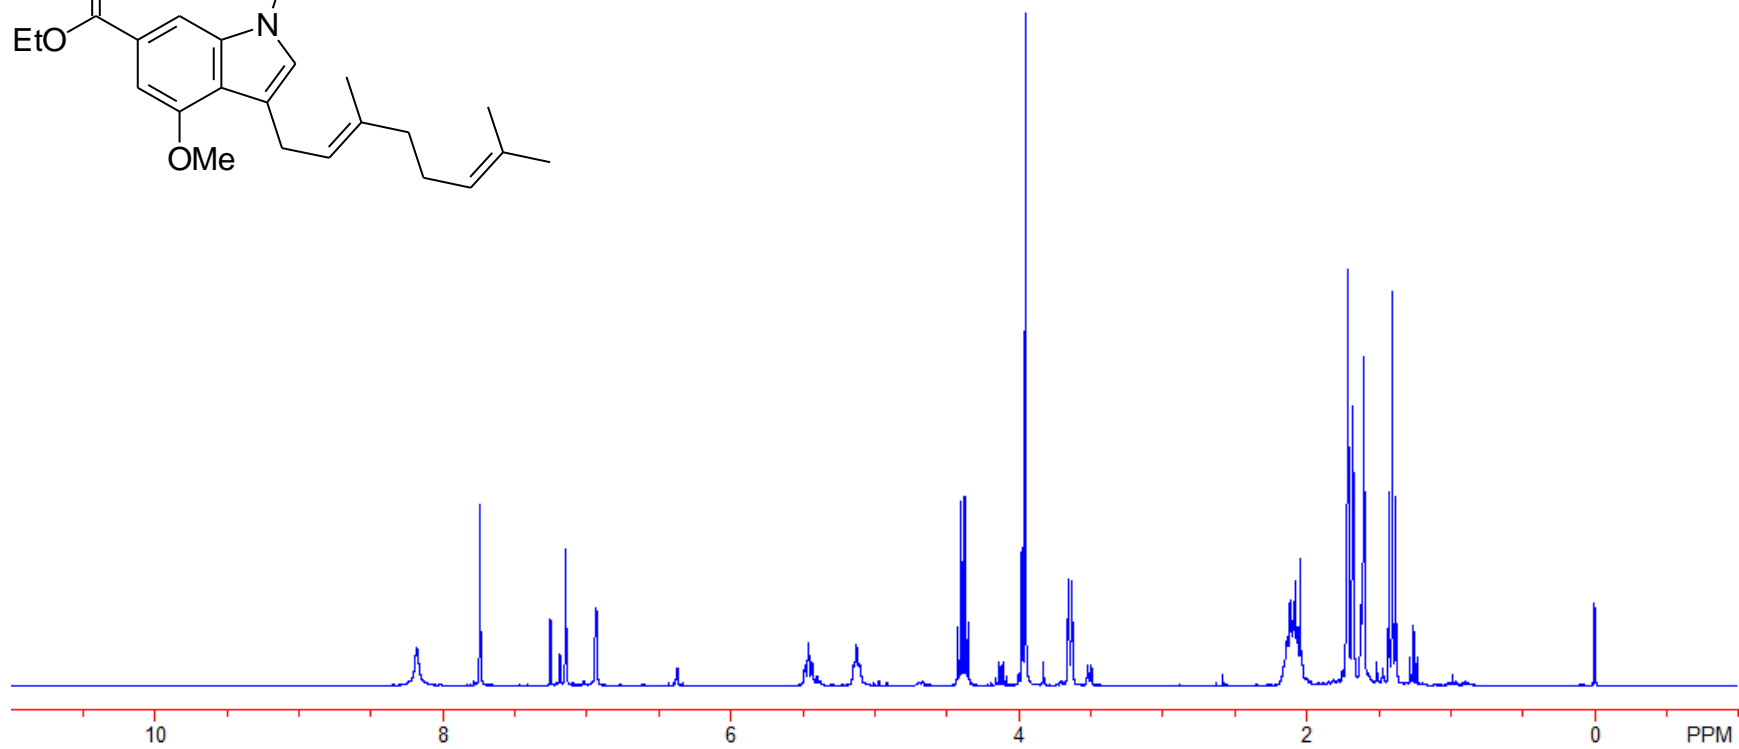

300 MHz <sup>1</sup>H NMR Spectrum for Compound 34

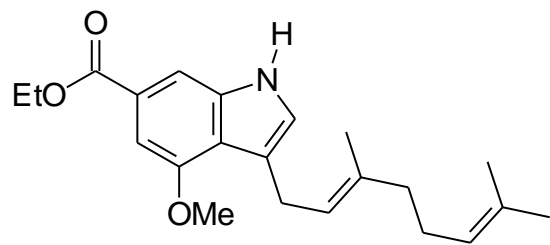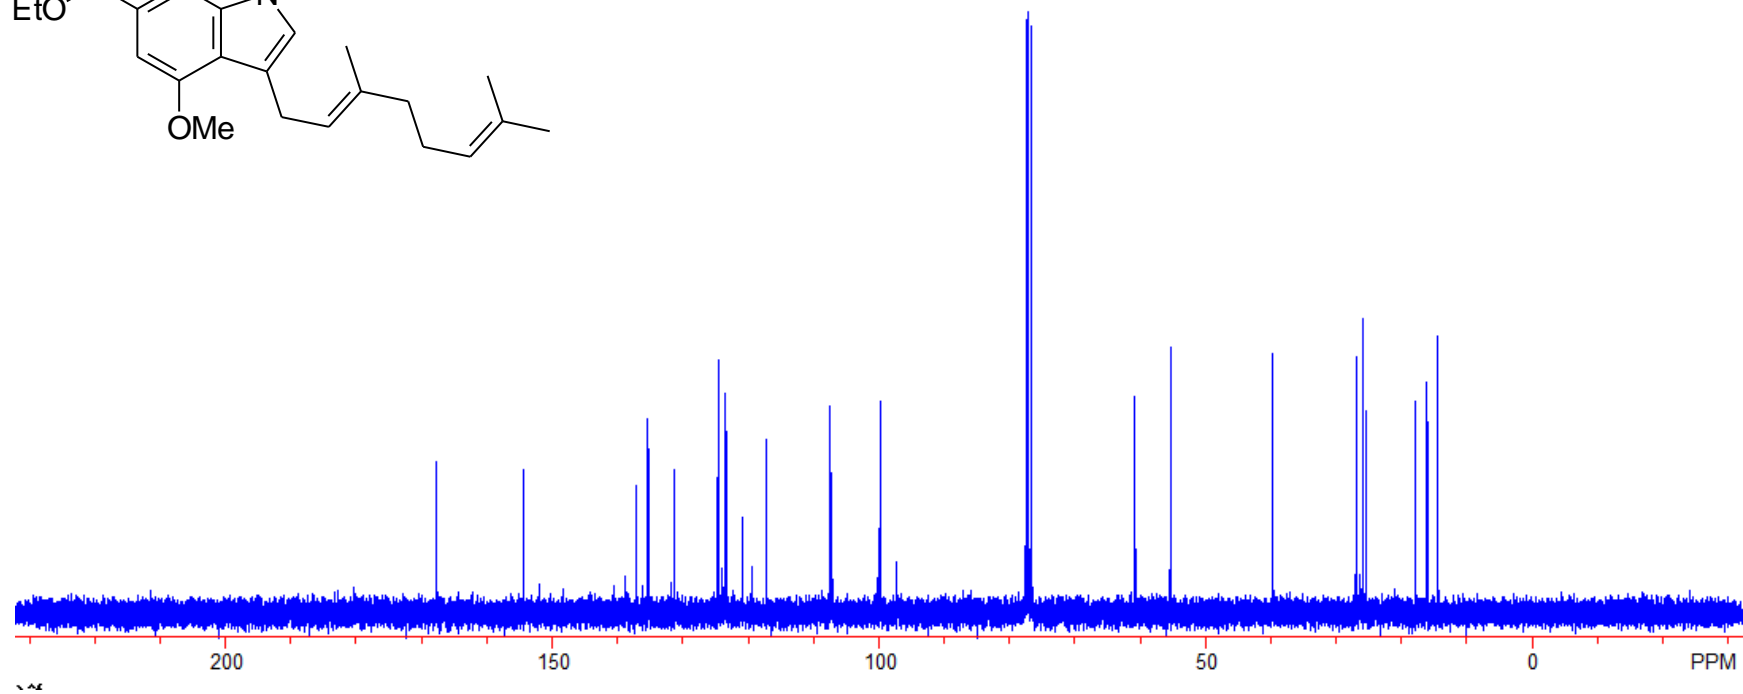

75 MHz <sup>13</sup>C NMR Spectrum for Compound 34



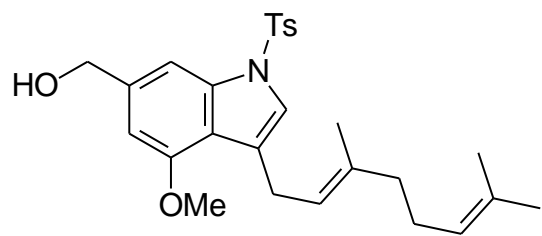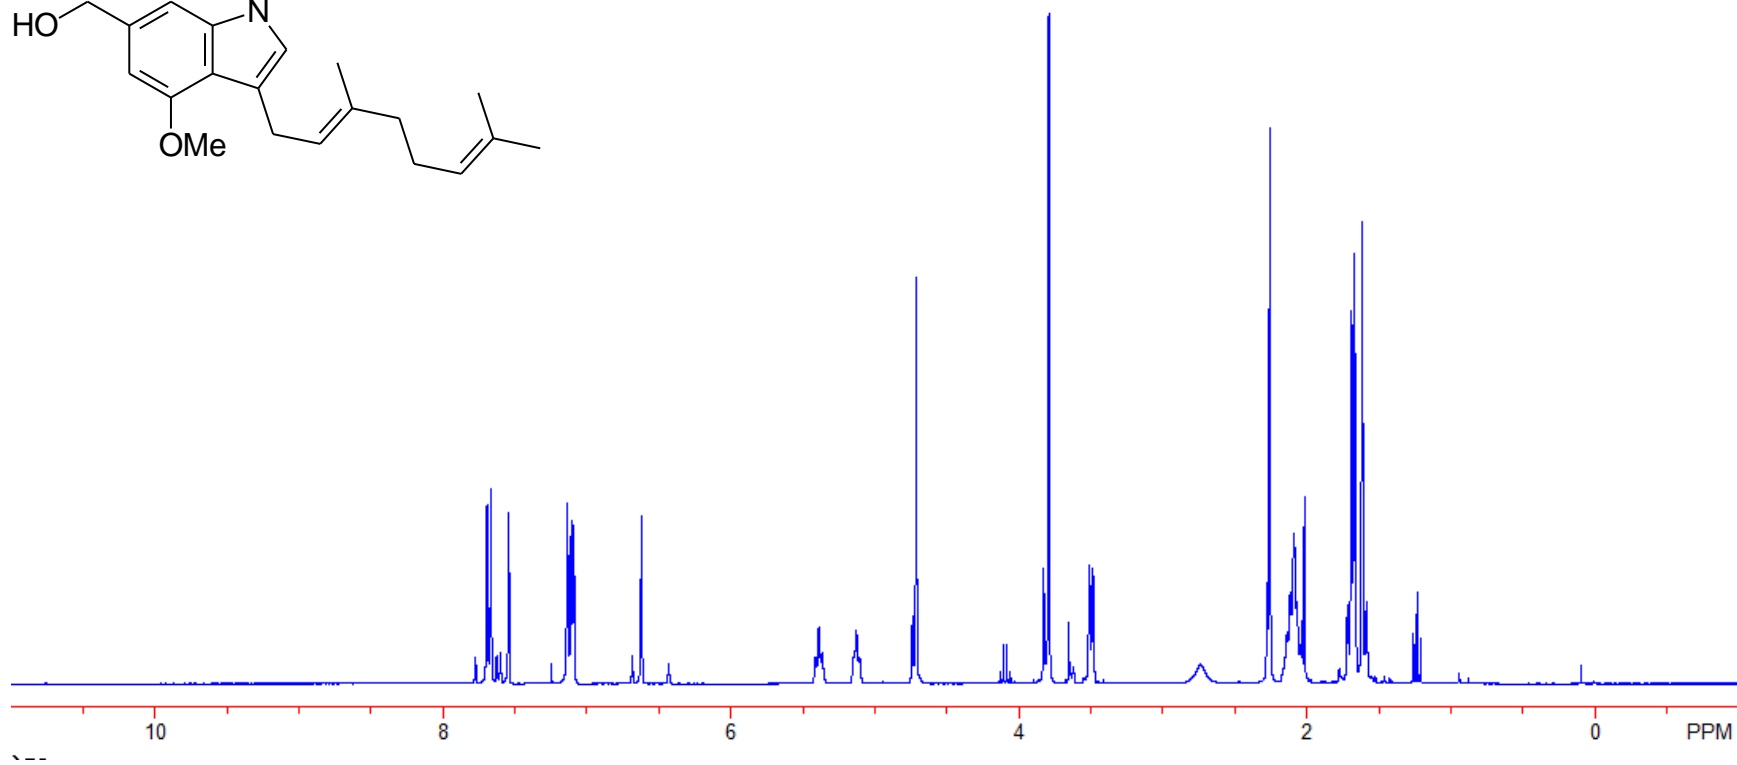

300 MHz <sup>1</sup>H NMR Spectrum for Compound 35

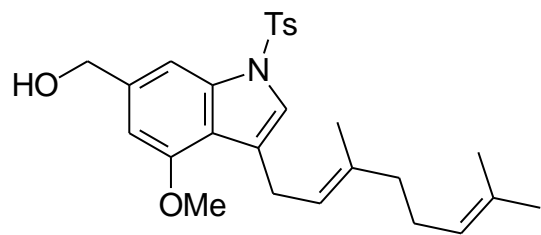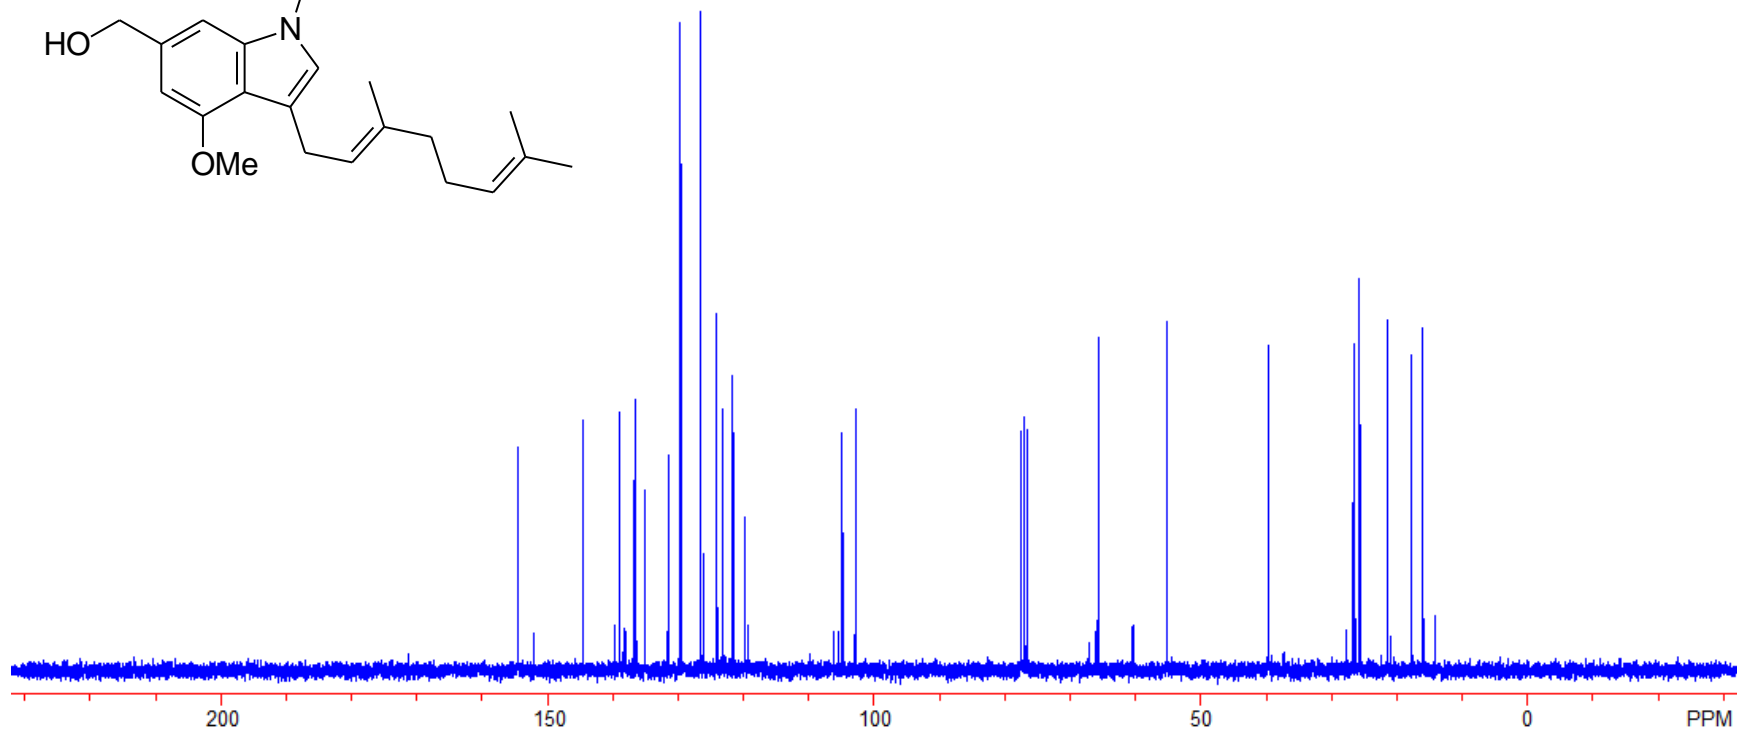

75 MHz  $^{13}\text{C}$  NMR Spectrum for Compound **35**

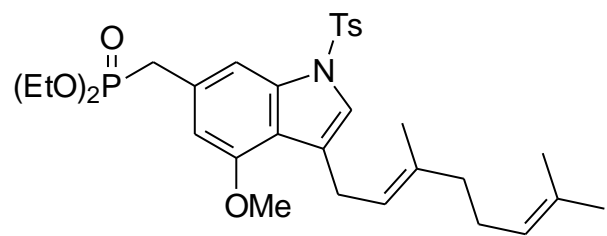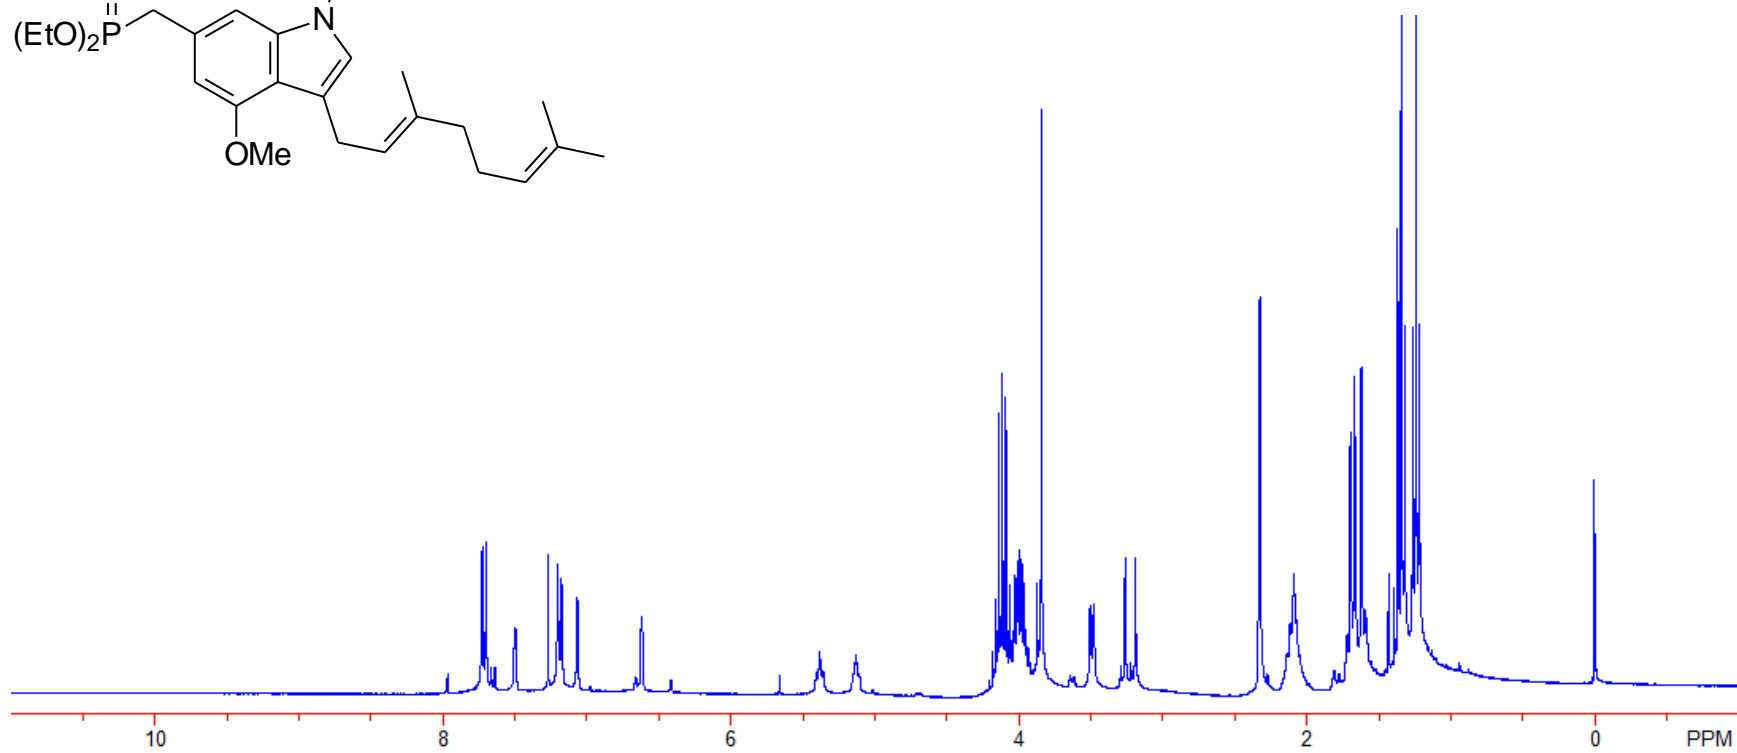

300 MHz <sup>1</sup>H NMR Spectrum for Compound 36

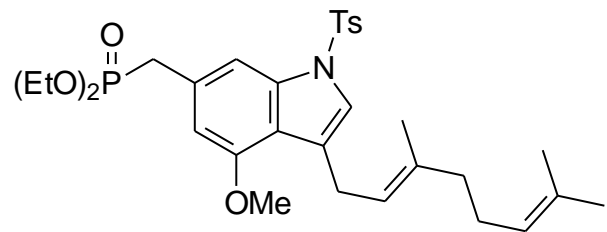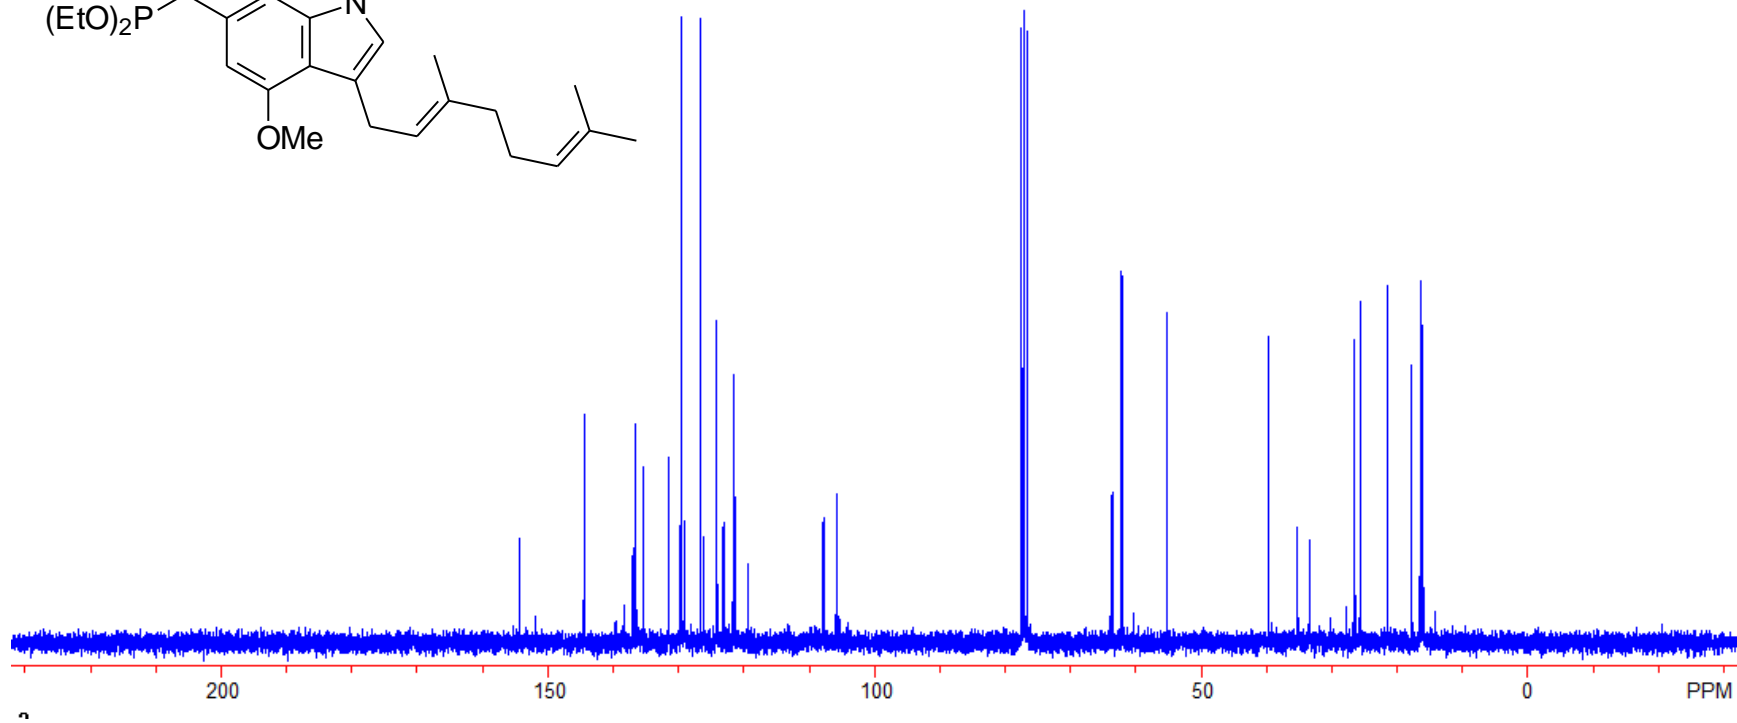

75 MHz  $^{13}\text{C}$  NMR Spectrum for Compound 36

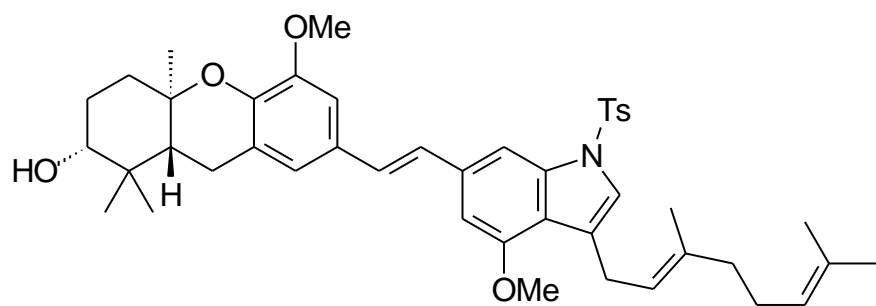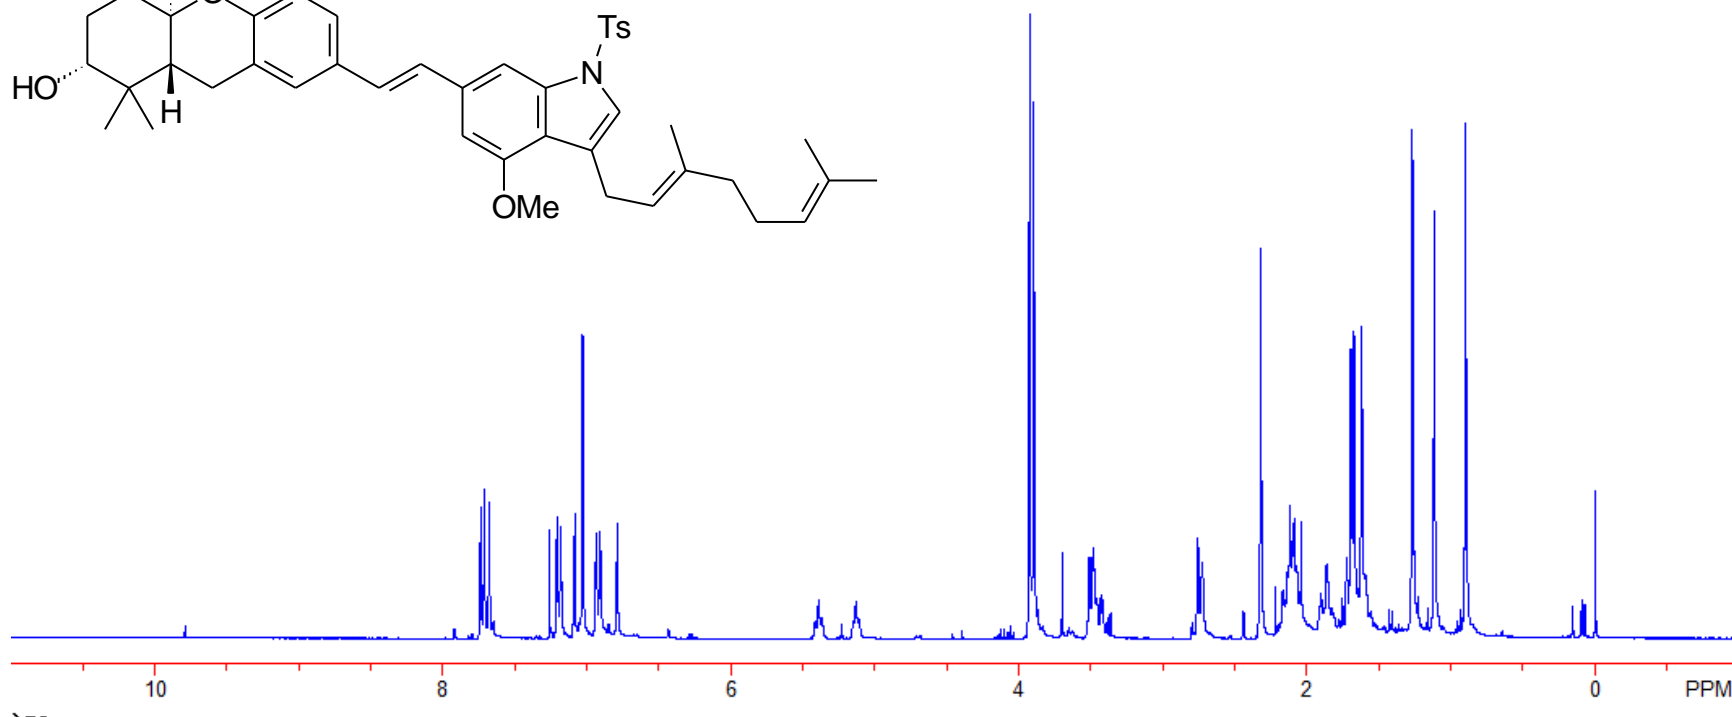

300 MHz <sup>1</sup>H NMR Spectrum for Compound 37

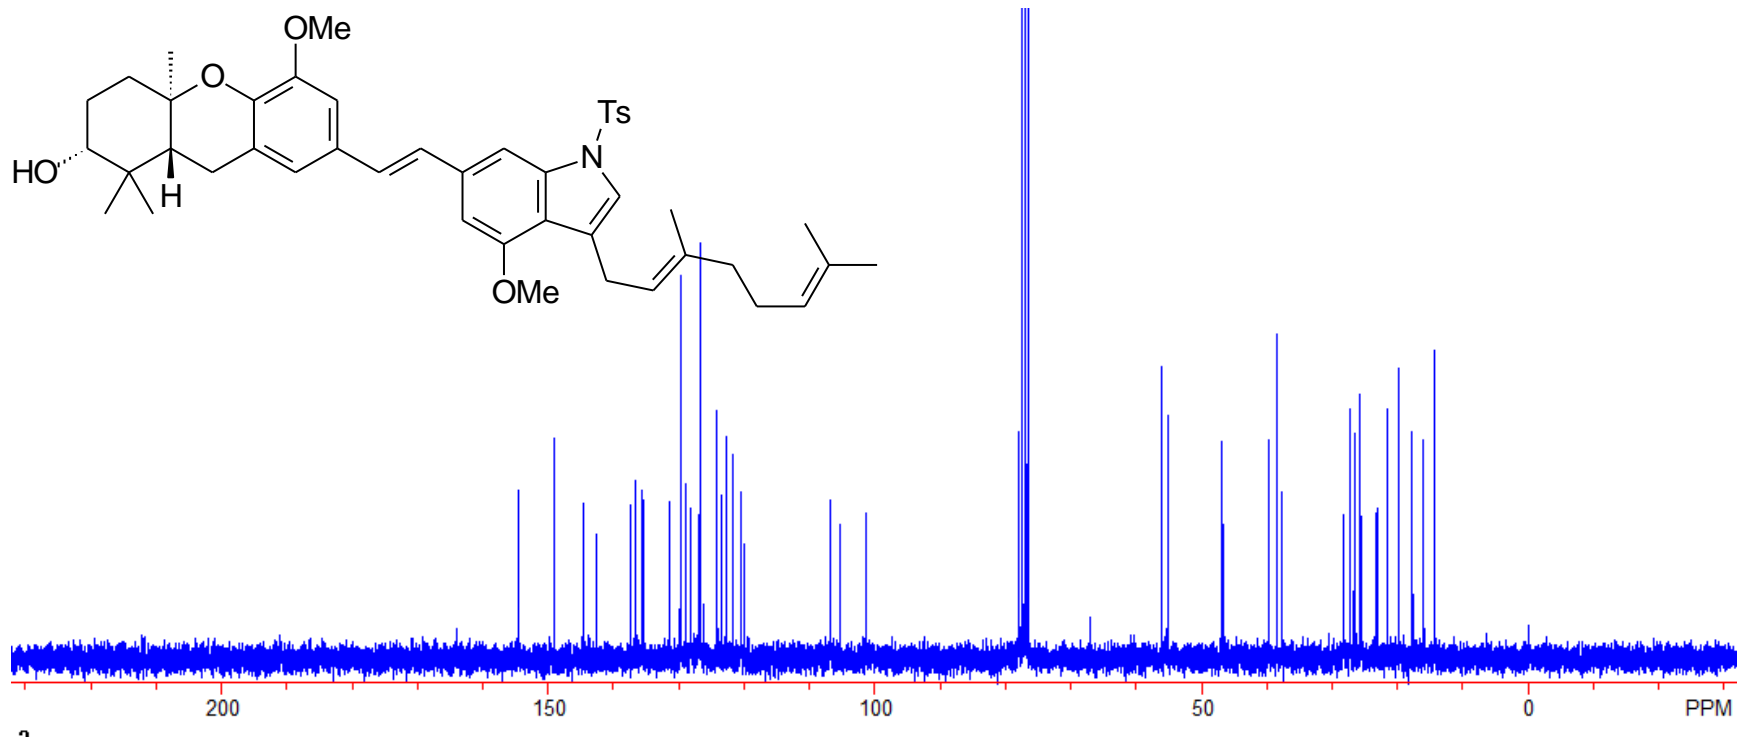

75 MHz  $^{13}\text{C}$  NMR Spectrum for Compound **37**

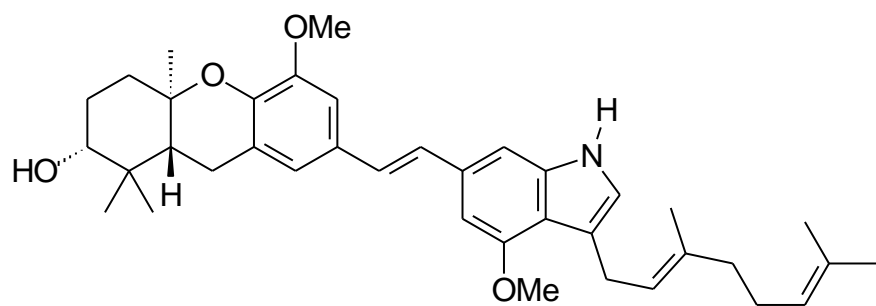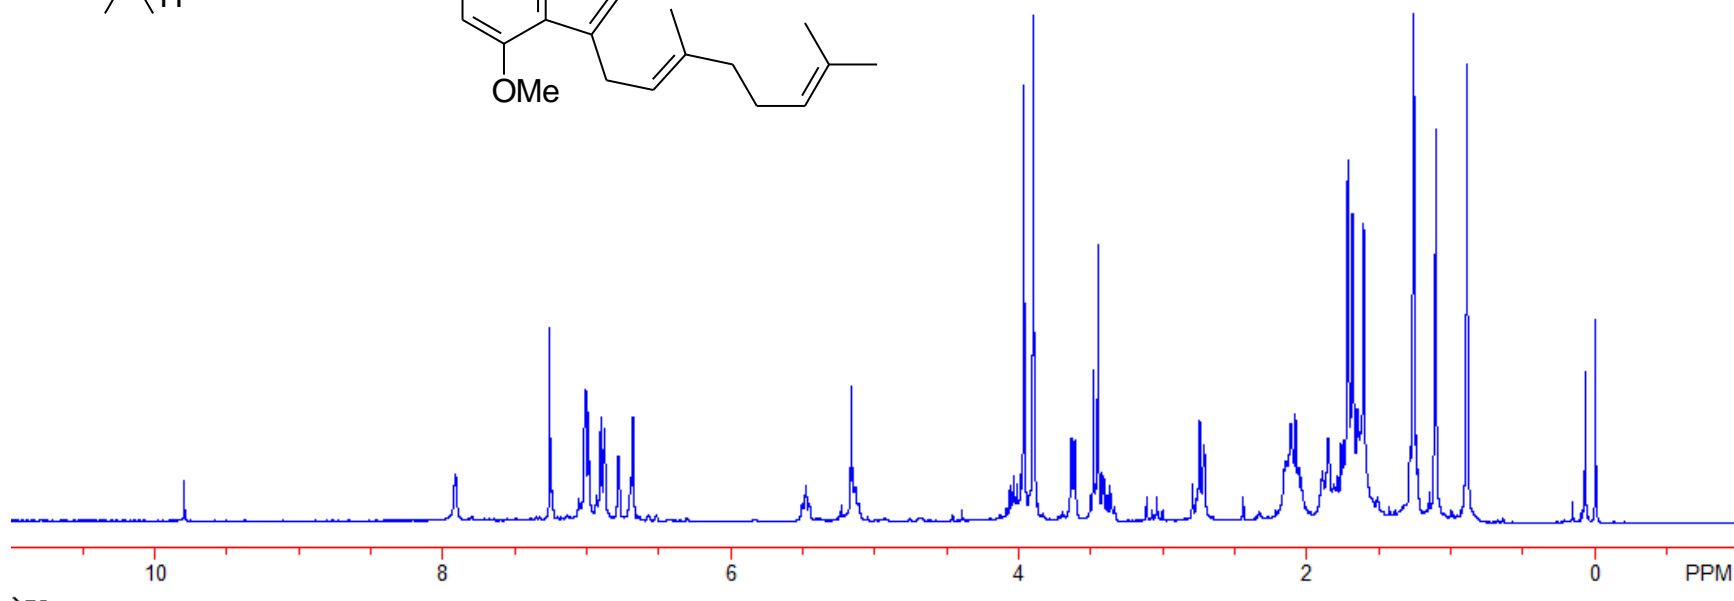

300 MHz  $^1\text{H}$  NMR Spectrum for Compound 38

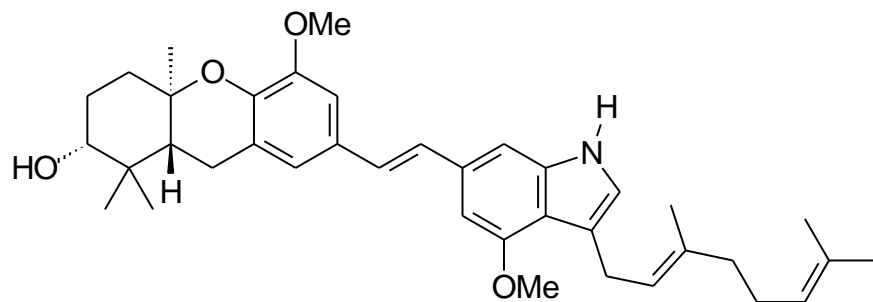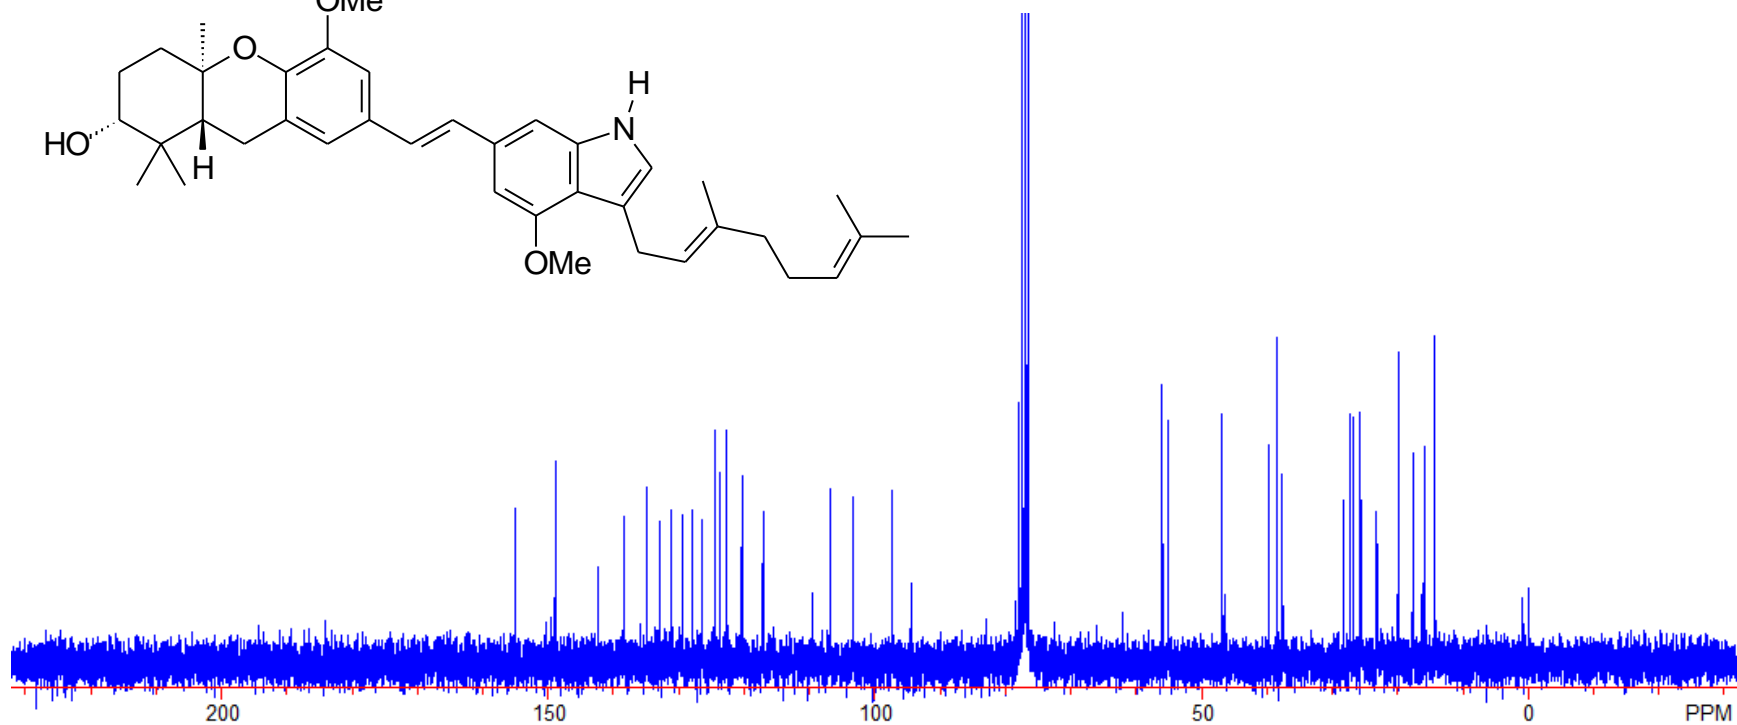

75 MHz <sup>13</sup>C NMR Spectrum for Compound 38



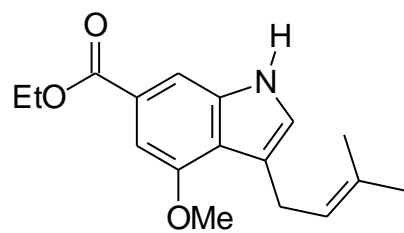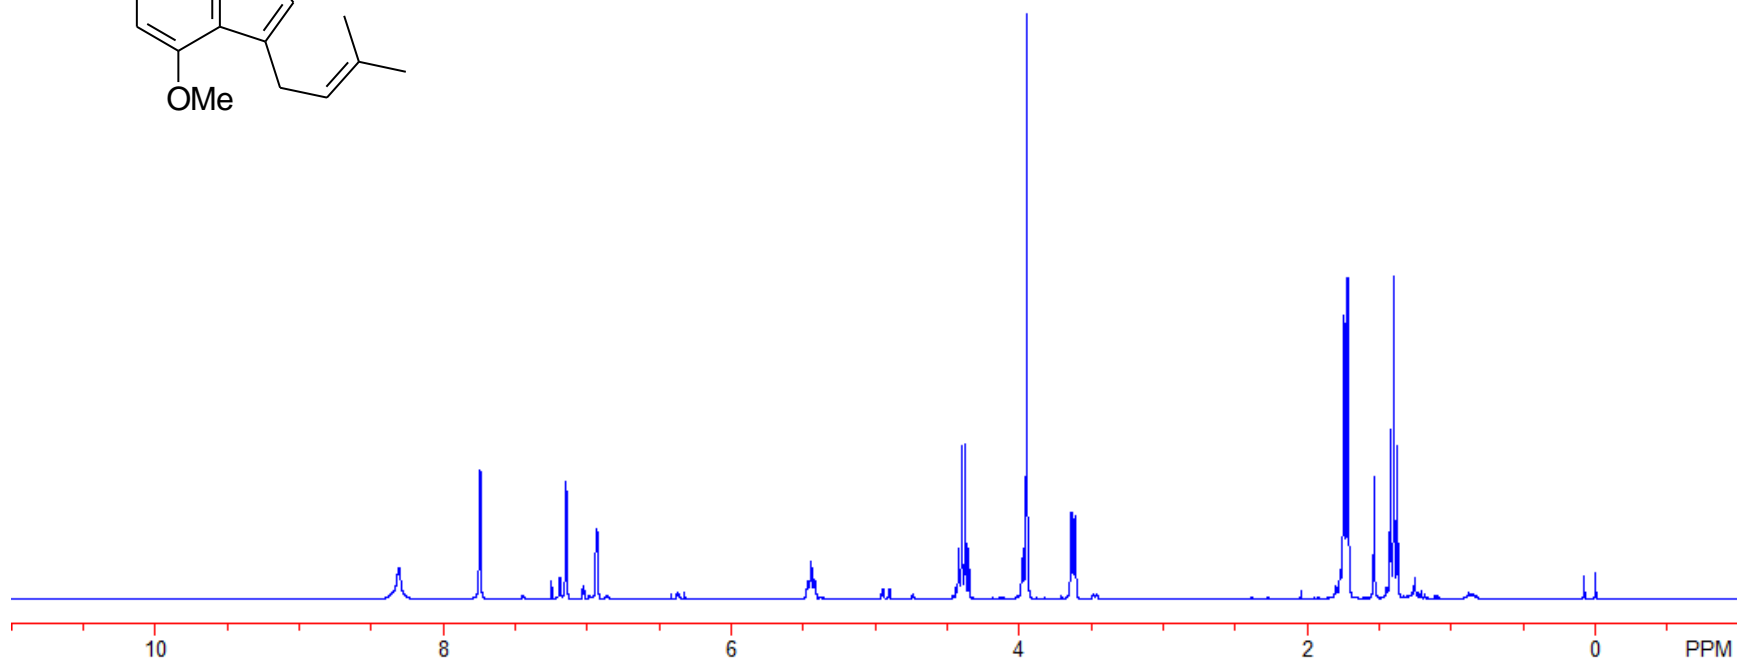

300 MHz <sup>1</sup>H NMR Spectrum for Compound **39**

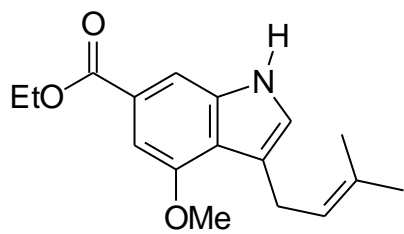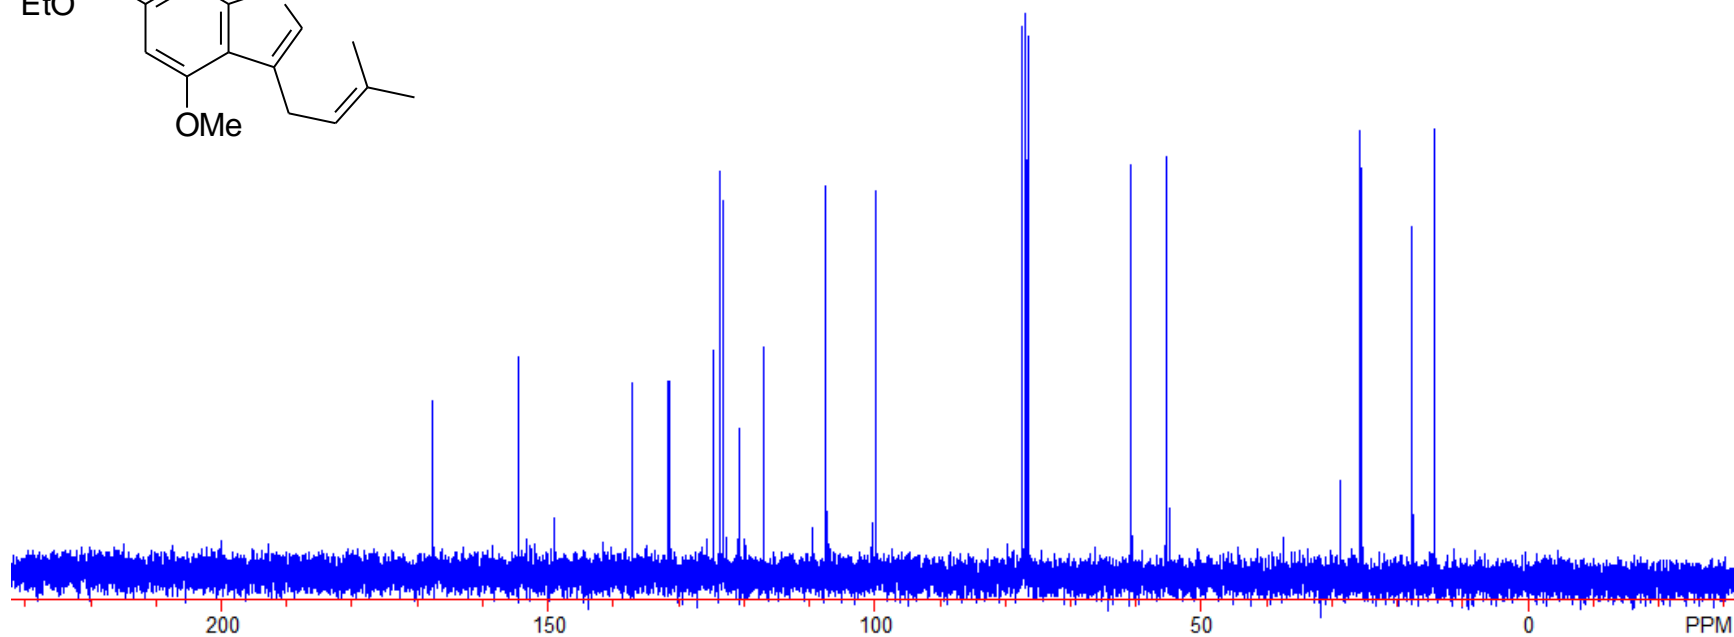

75 MHz <sup>13</sup>C NMR Spectrum for Compound 39

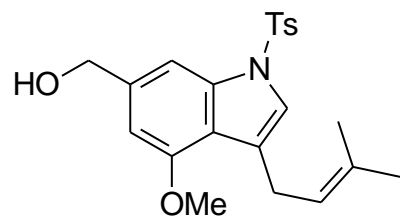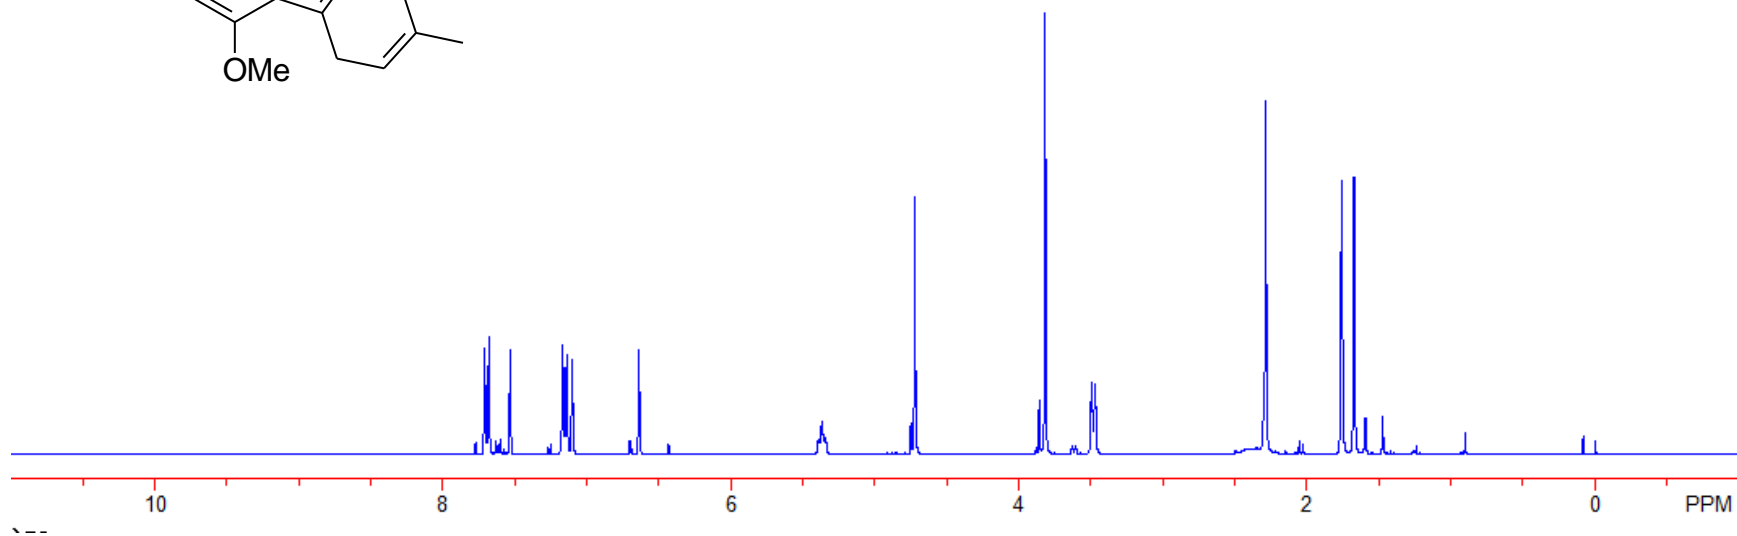

300 MHz <sup>1</sup>H NMR Spectrum for Compound 40

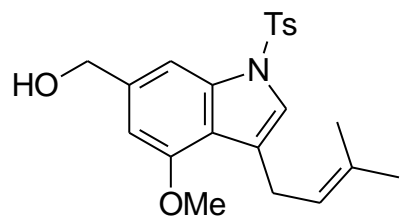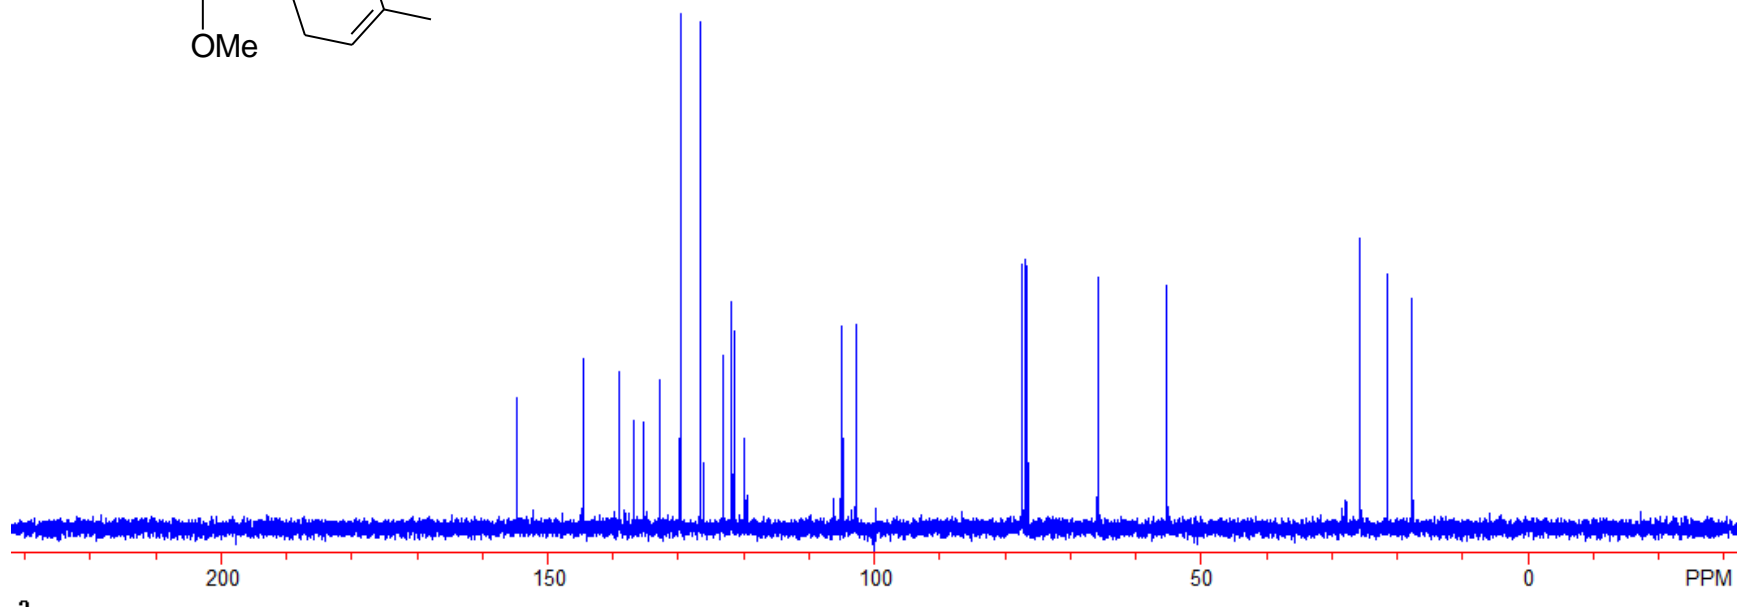

75 MHz <sup>13</sup>C NMR Spectrum for Compound 40

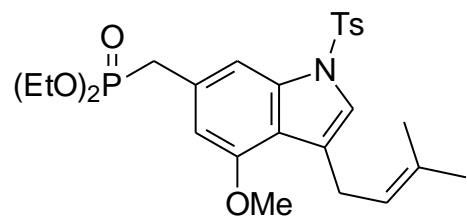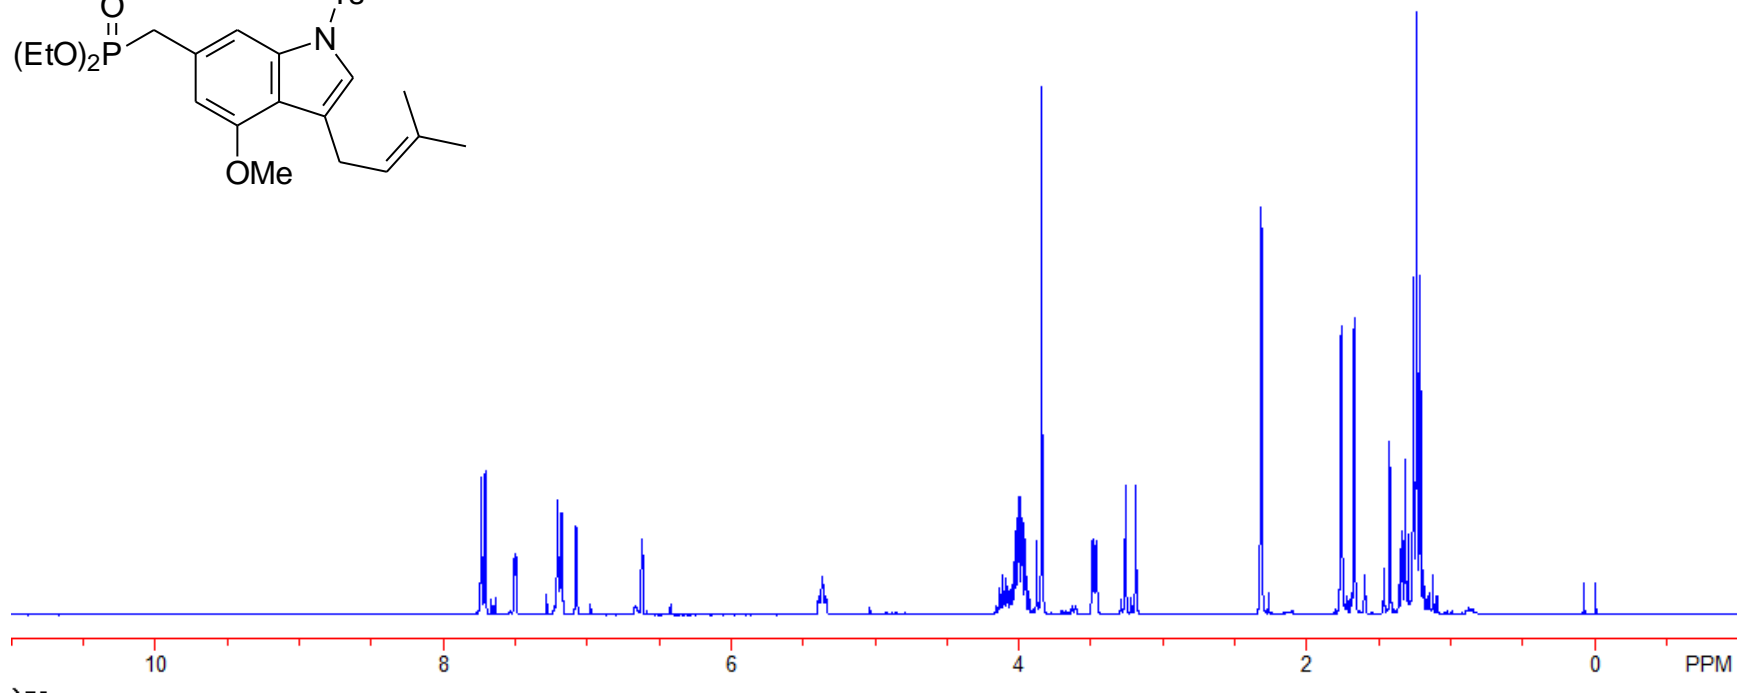

300 MHz <sup>1</sup>H NMR Spectrum for Compound 41

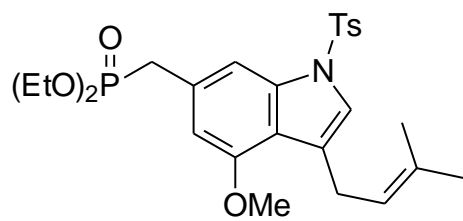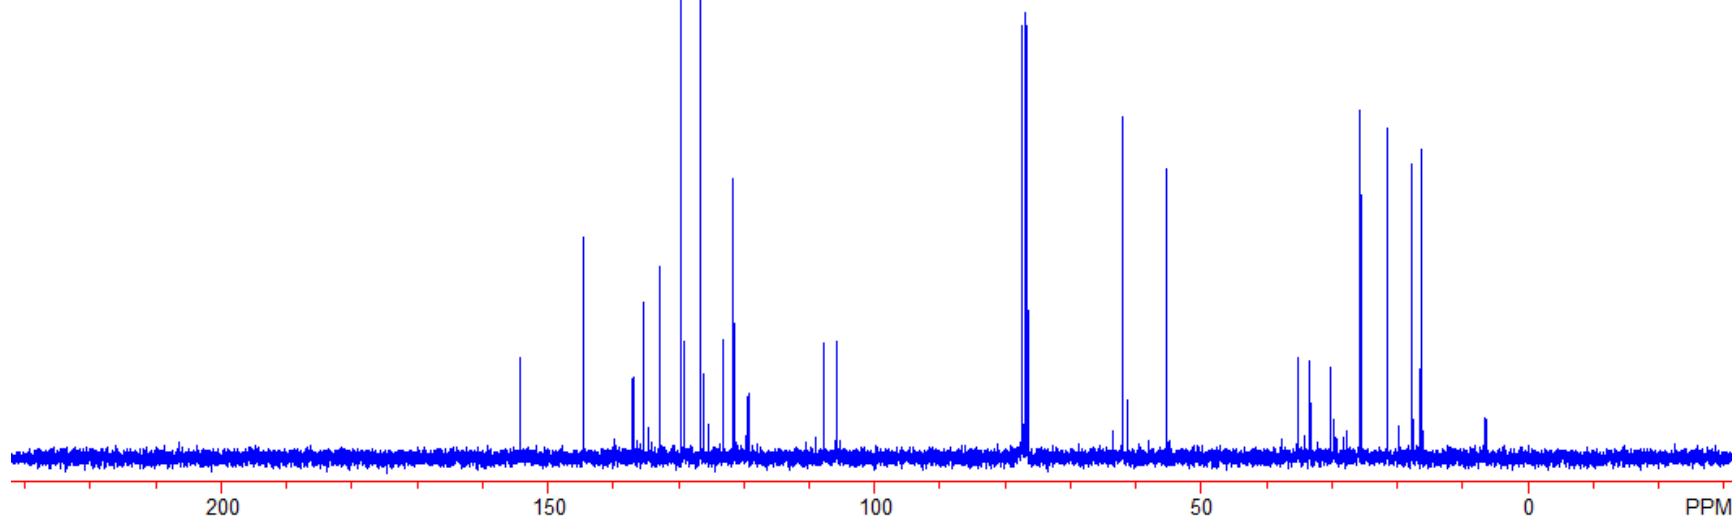

75 MHz <sup>13</sup>C NMR Spectrum for Compound 41

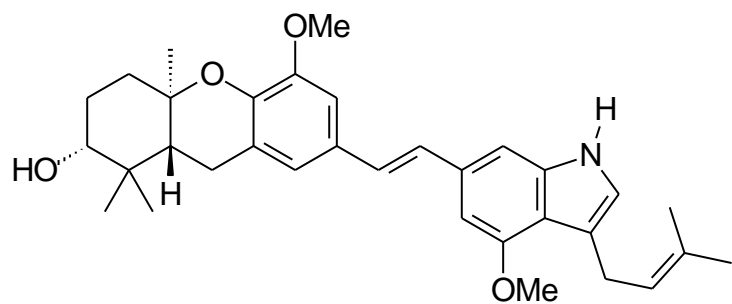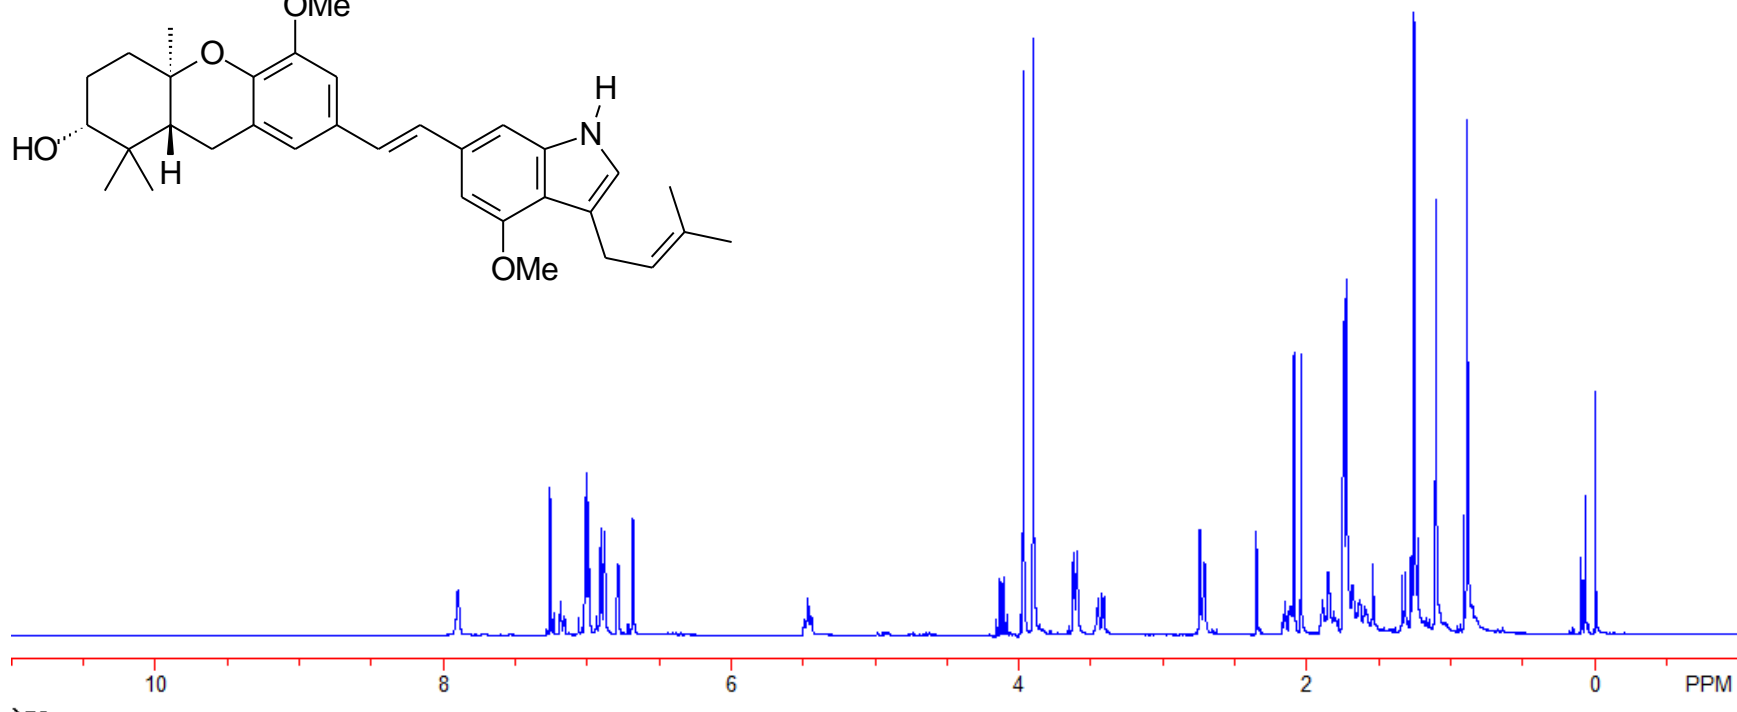

300 MHz <sup>1</sup>H NMR Spectrum for Compound 43

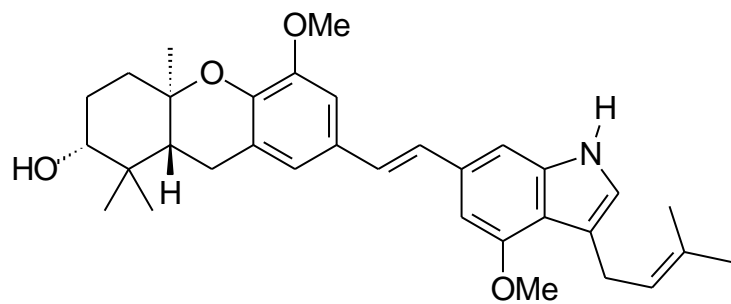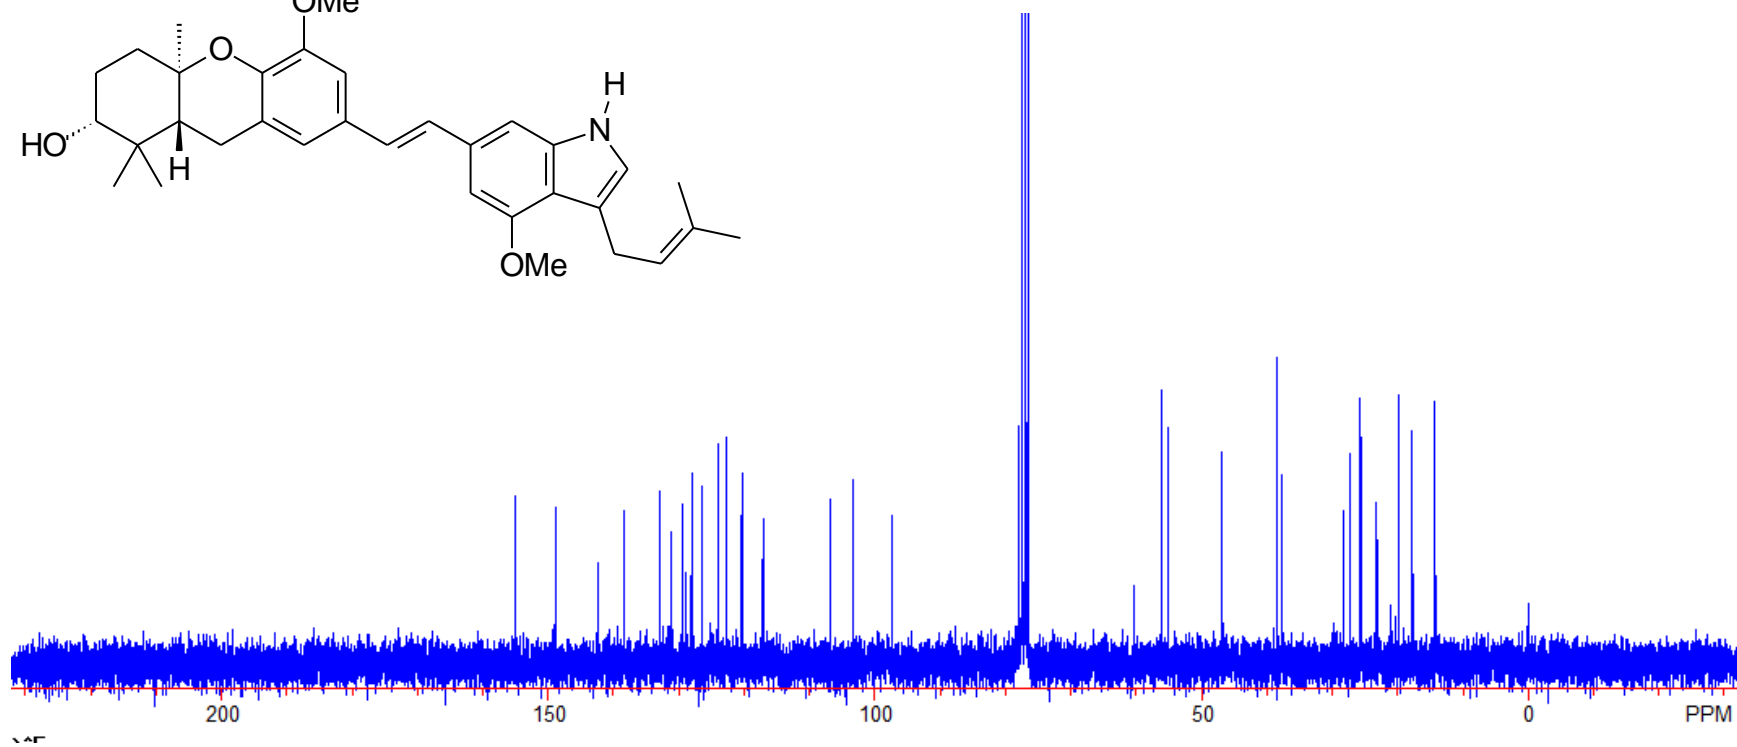

75 MHz <sup>13</sup>C NMR Spectrum for Compound 43



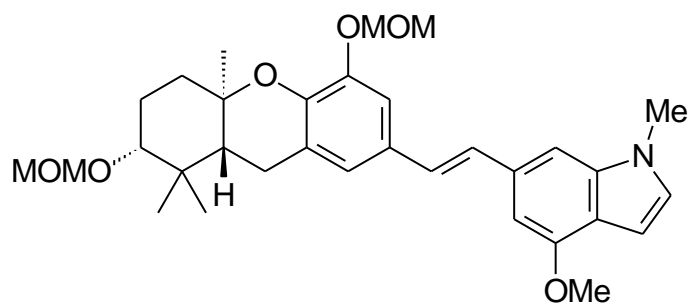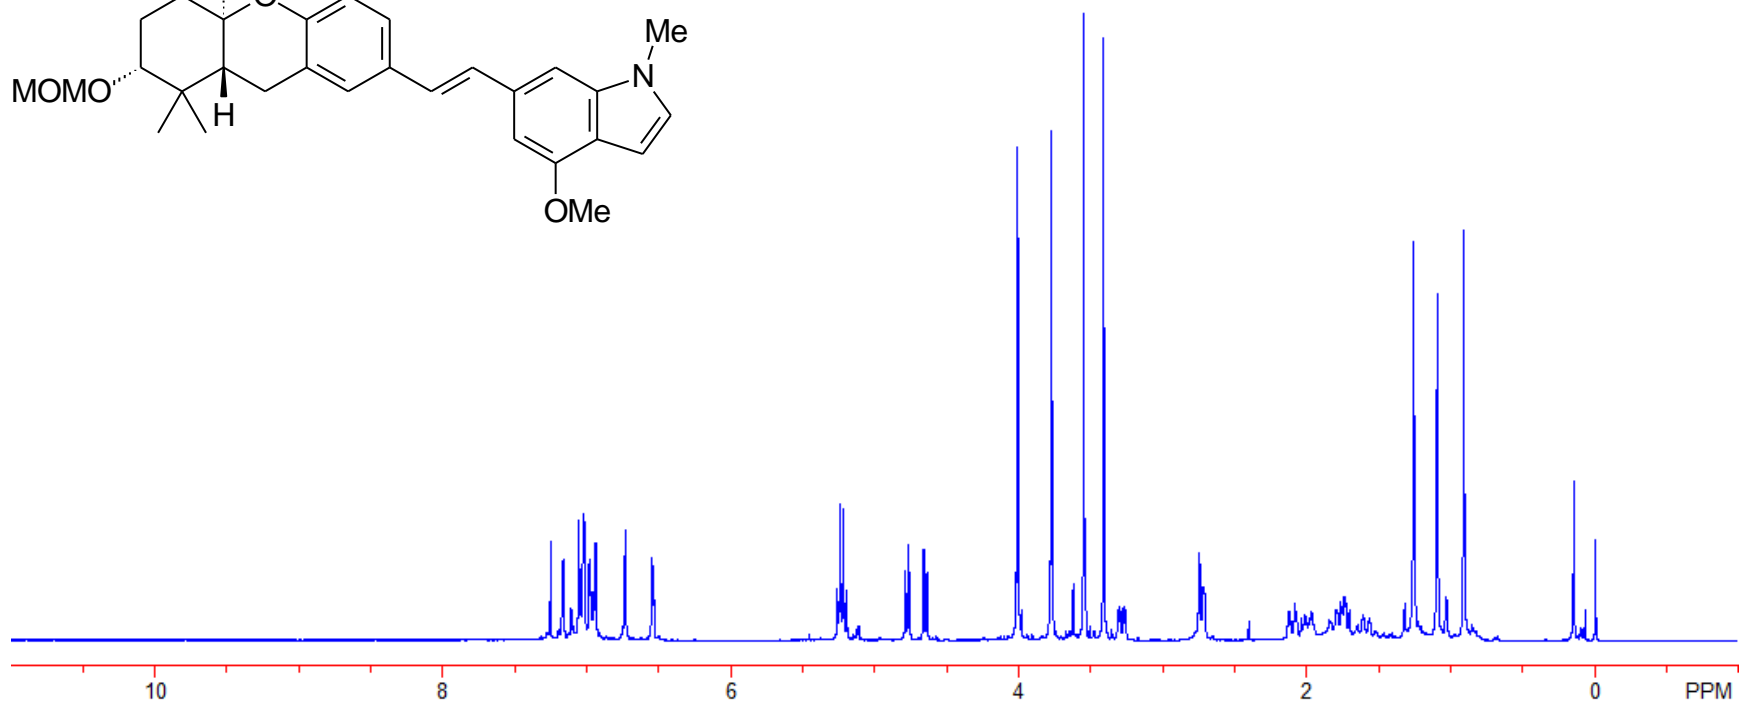

300 MHz <sup>1</sup>H NMR Spectrum for Compound 46

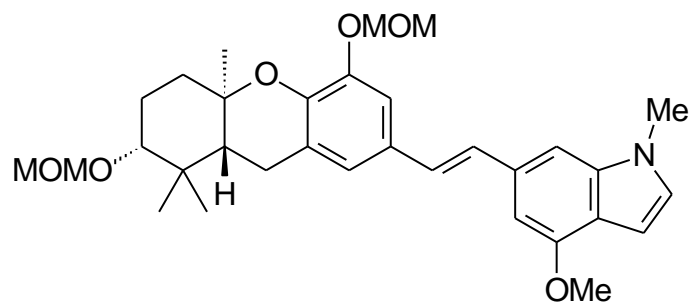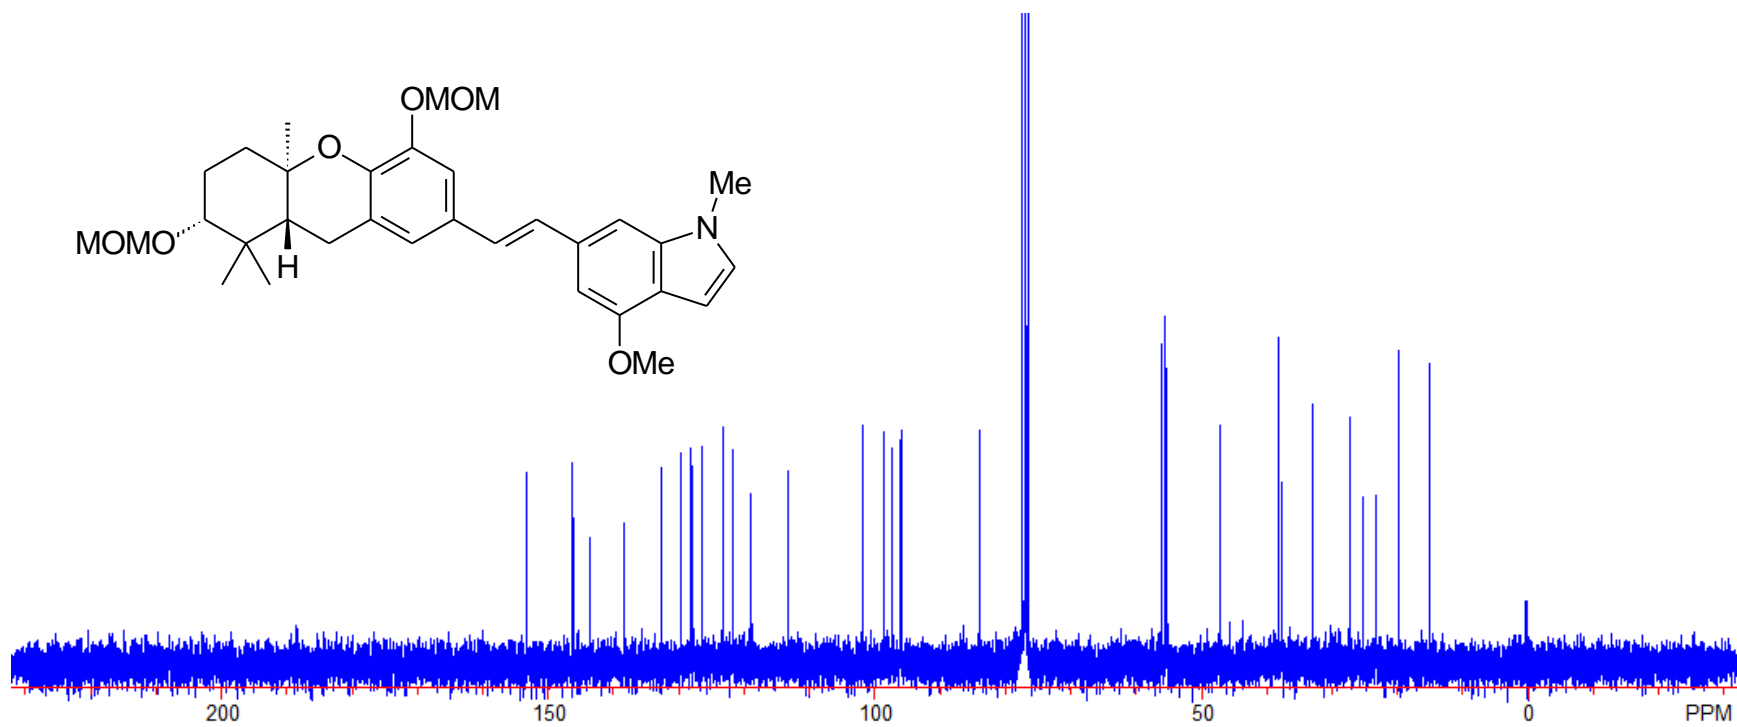

75 MHz <sup>13</sup>C NMR Spectrum for Compound 46

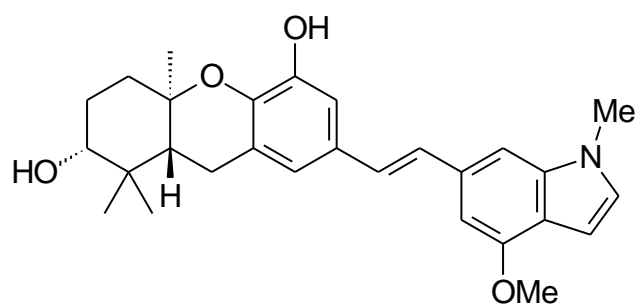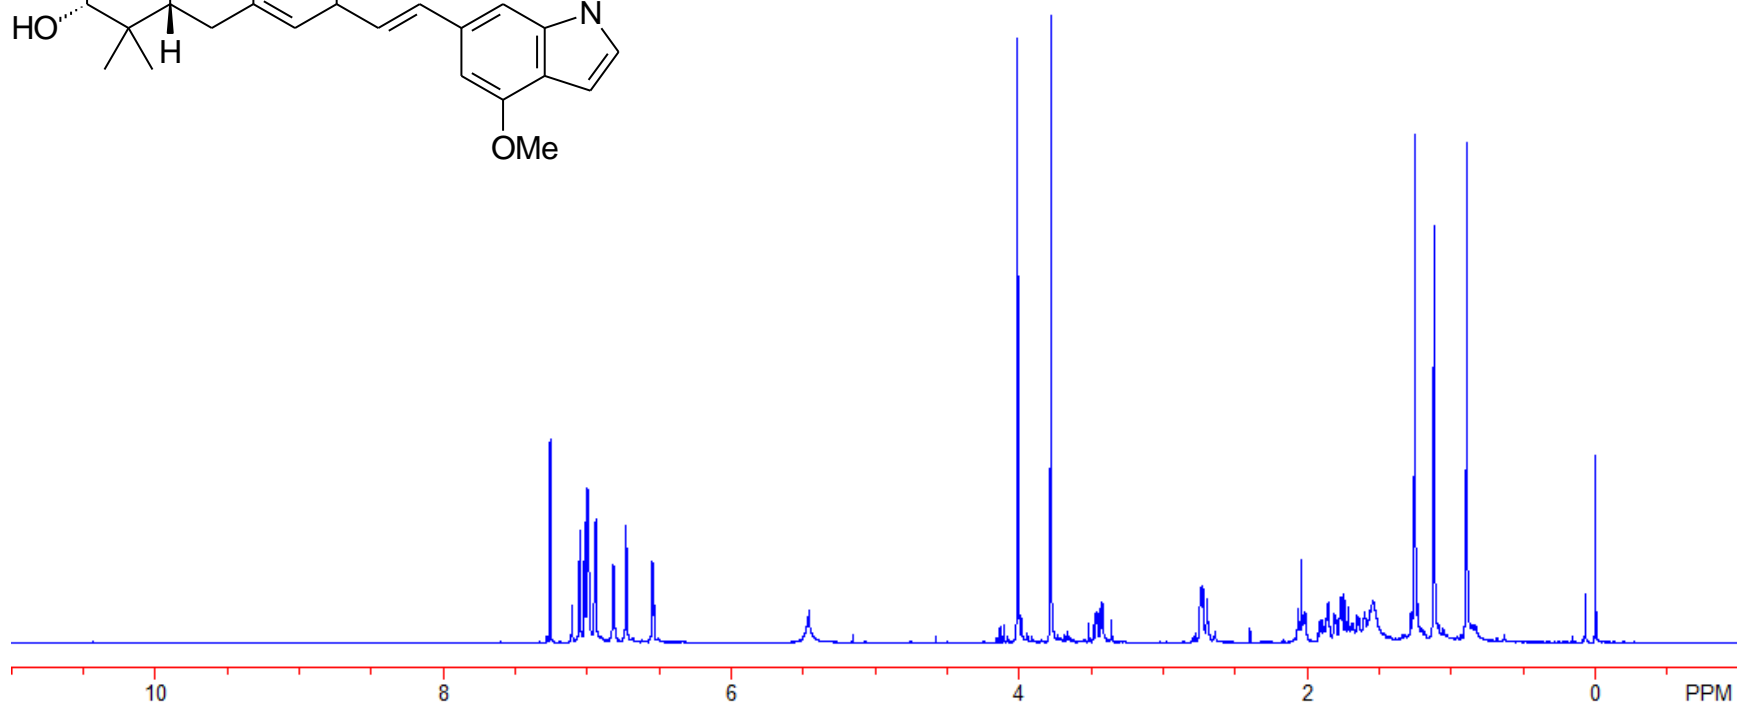

300 MHz <sup>1</sup>H NMR Spectrum for Compound 47

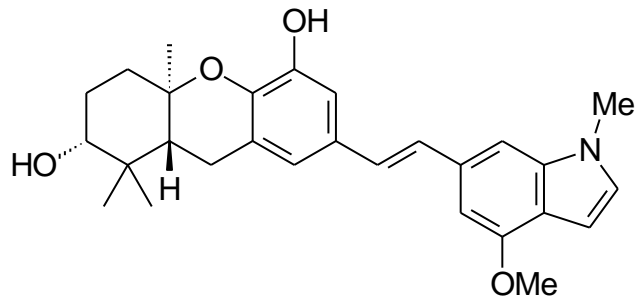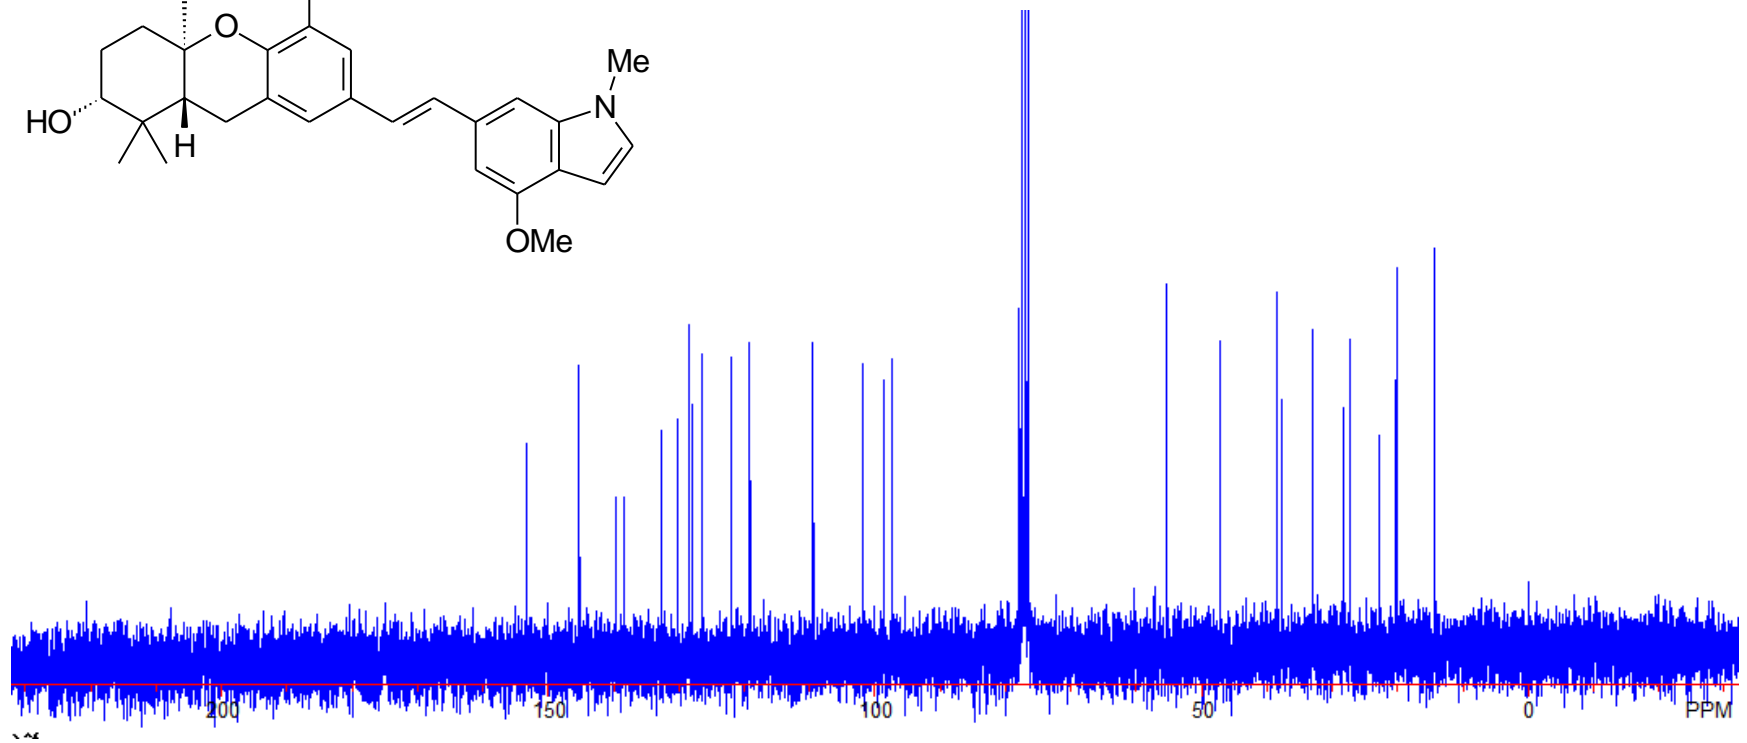

75 MHz <sup>13</sup>C NMR Spectrum for Compound 47

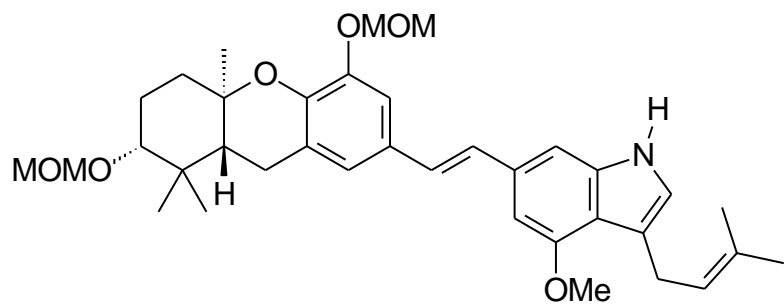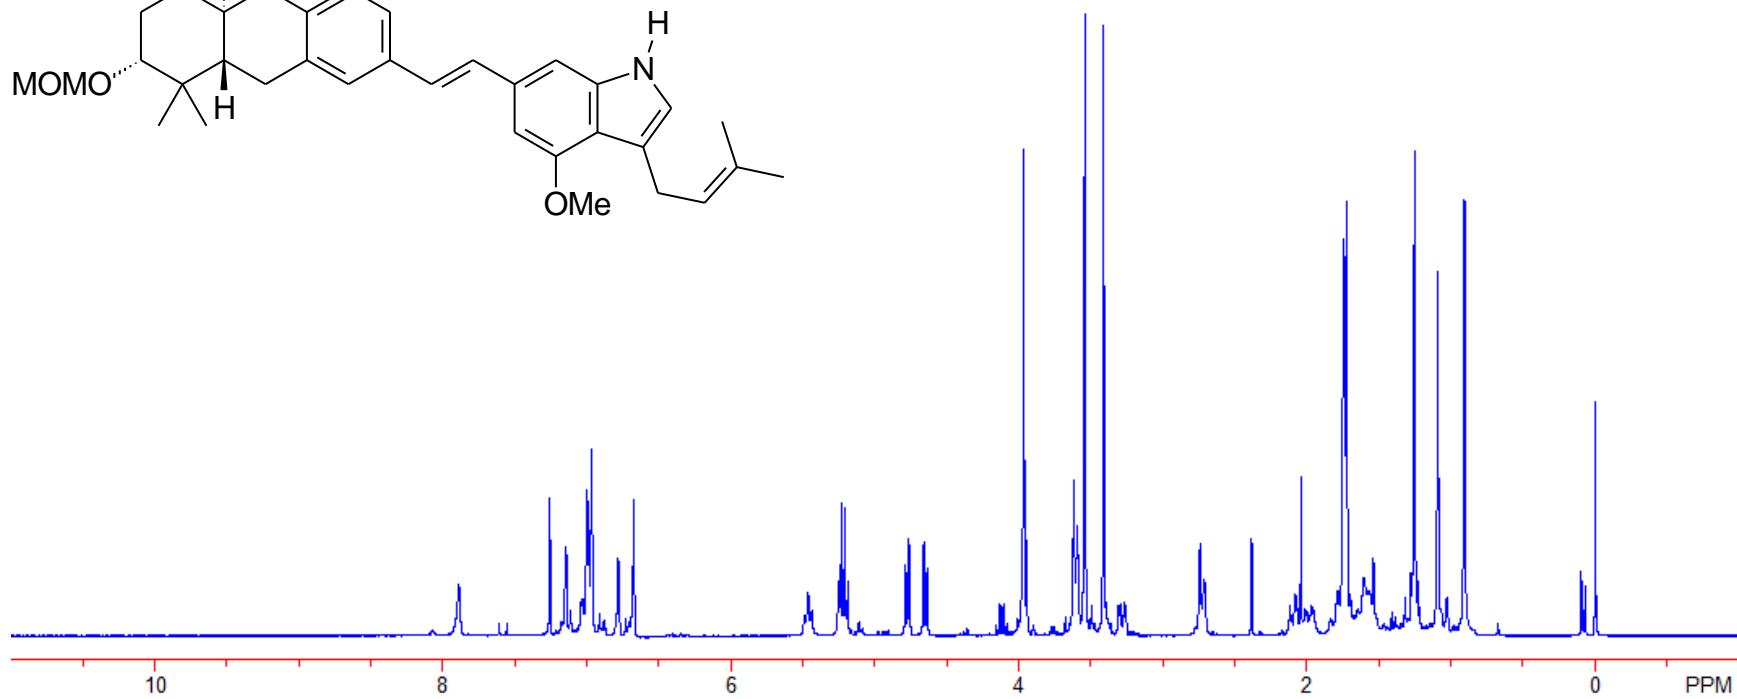

300 MHz <sup>1</sup>H NMR Spectrum for Compound 49

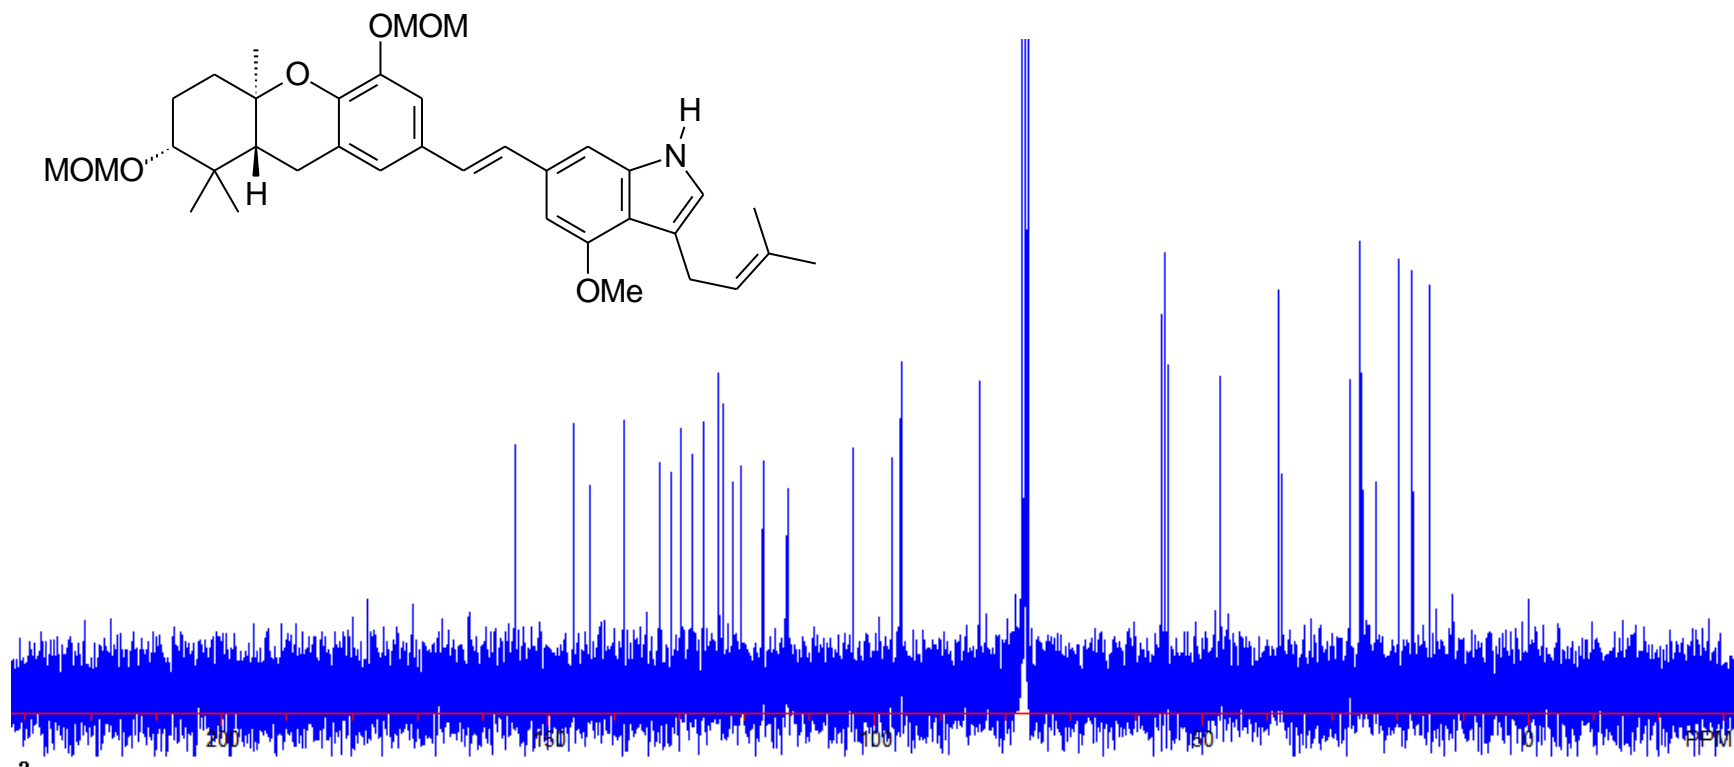

75 MHz <sup>13</sup>C NMR Spectrum for Compound 49

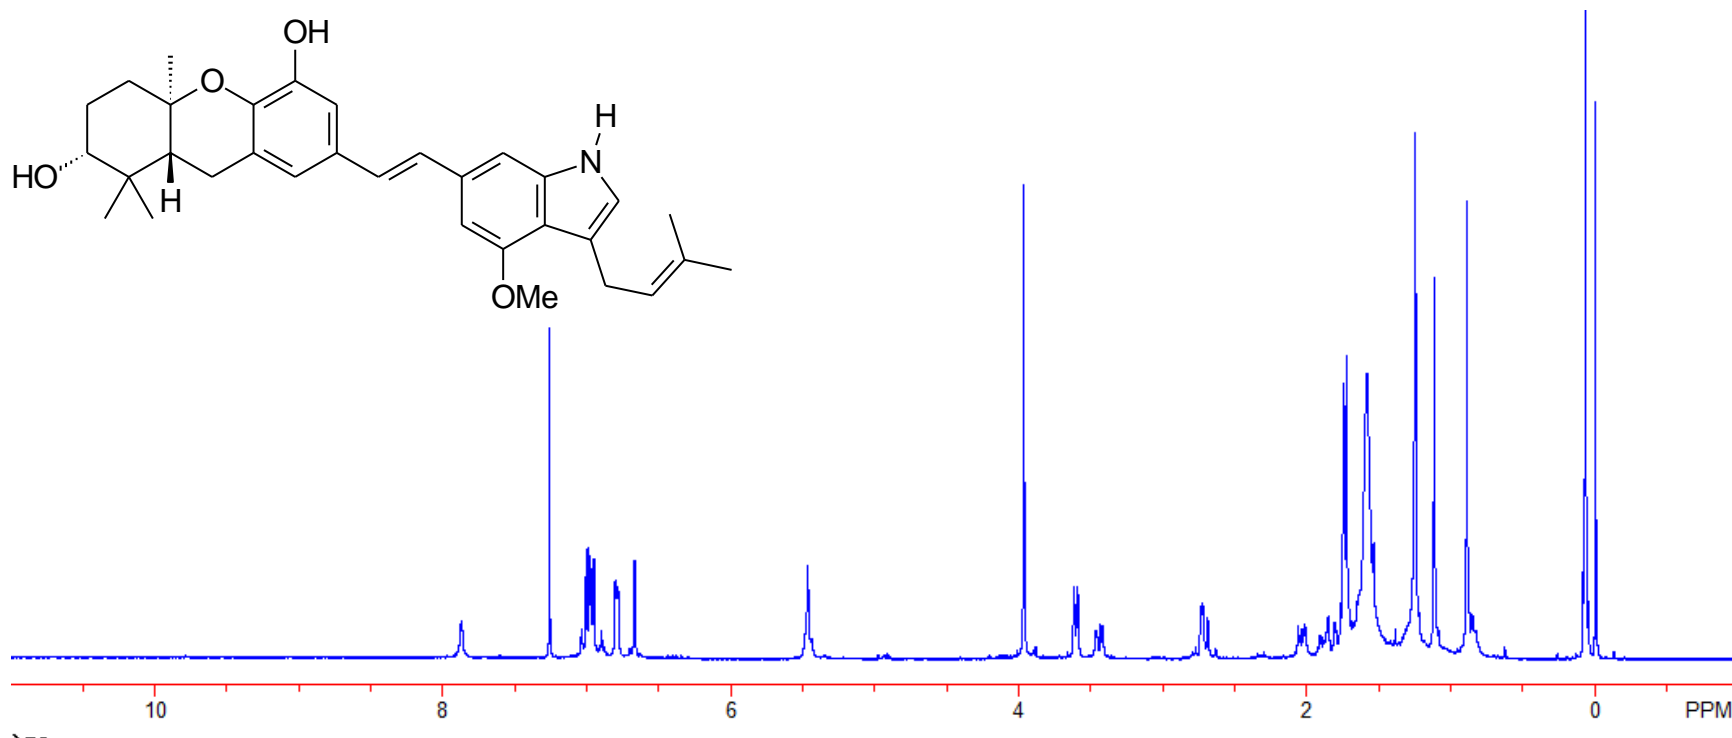

300 MHz  $^1\text{H}$  NMR Spectrum for Compound 50

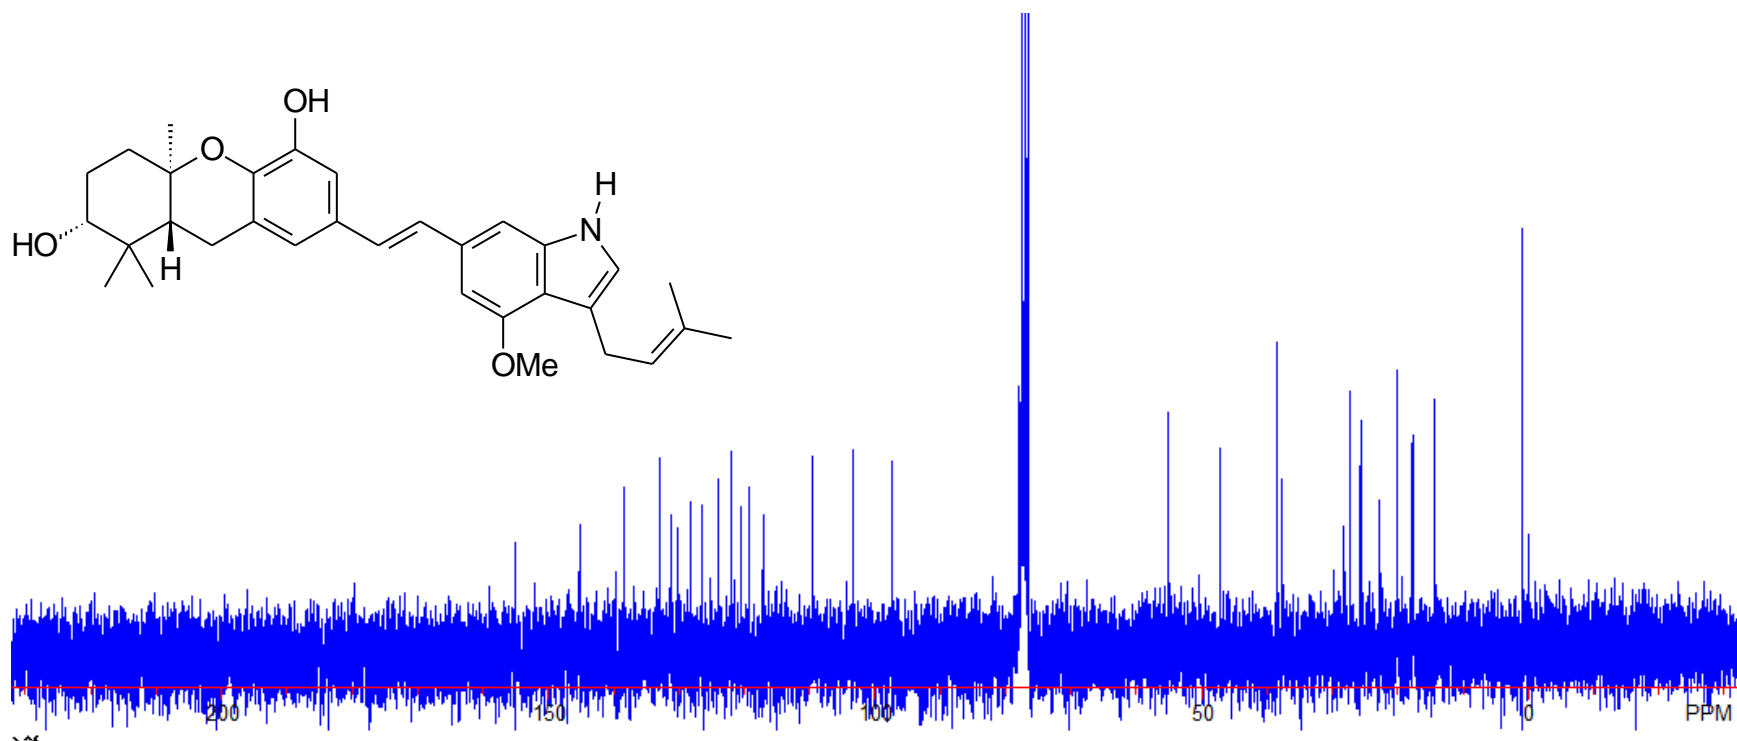

75 MHz  $^{13}\text{C}$  NMR Spectrum for Compound 50



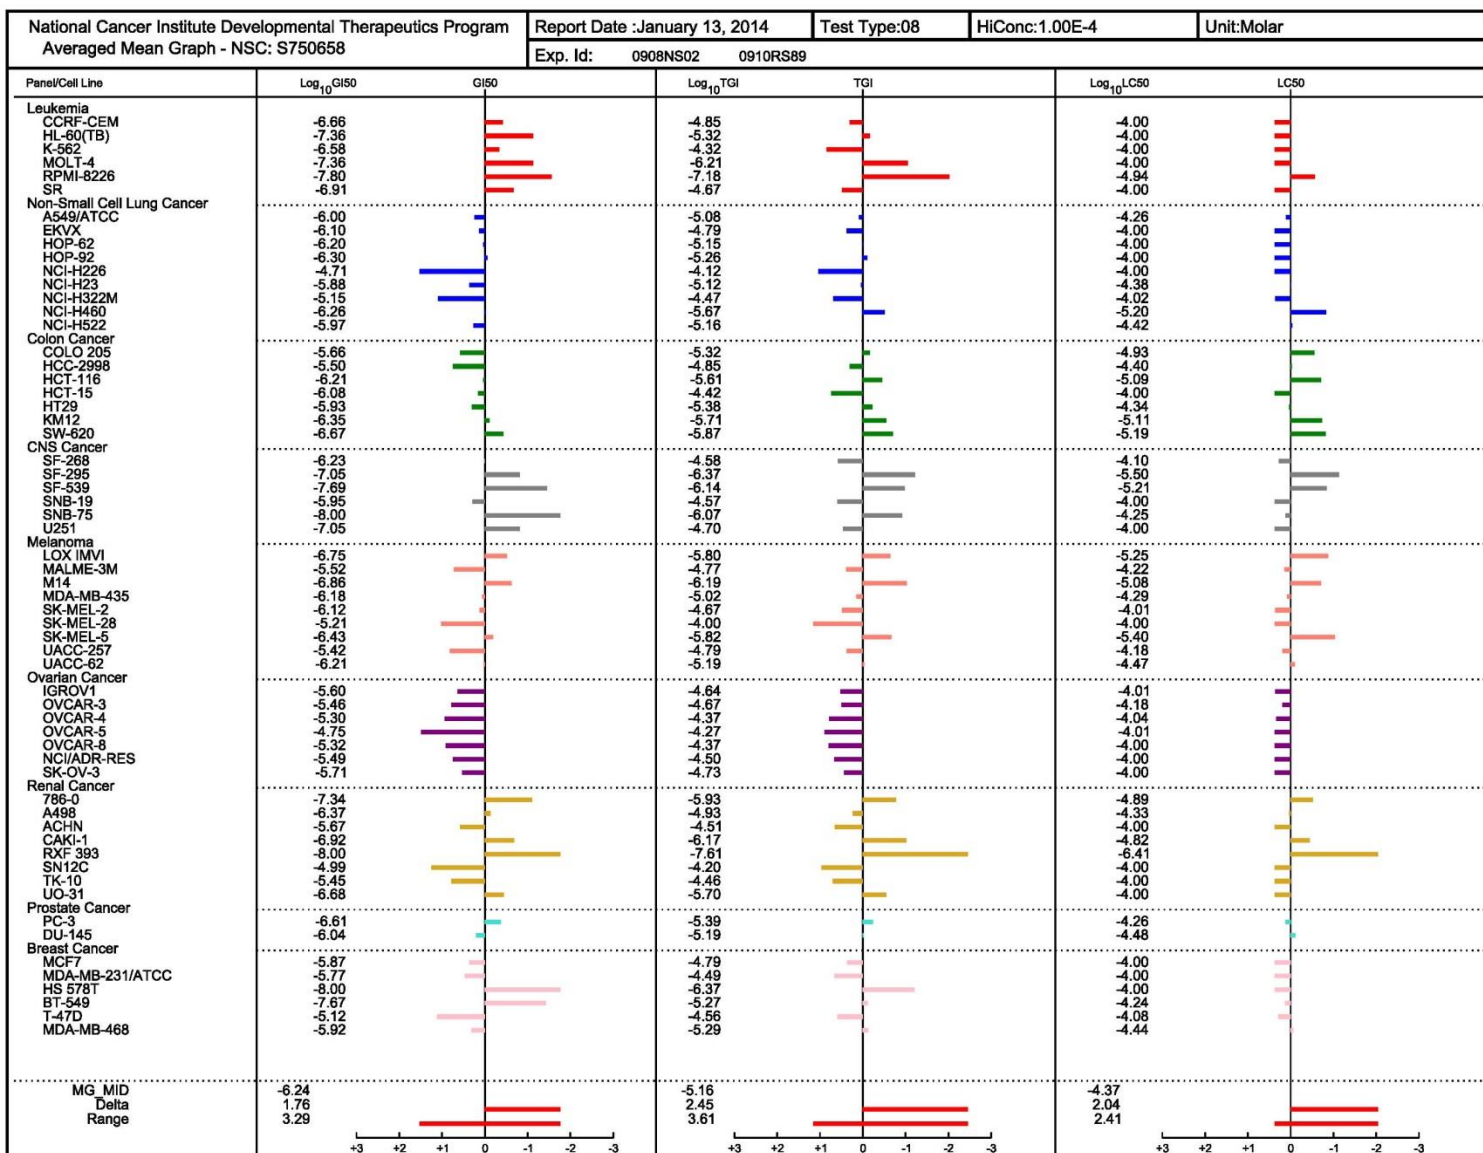

Average Mean Graph NCI 60 cell line data for compound 5

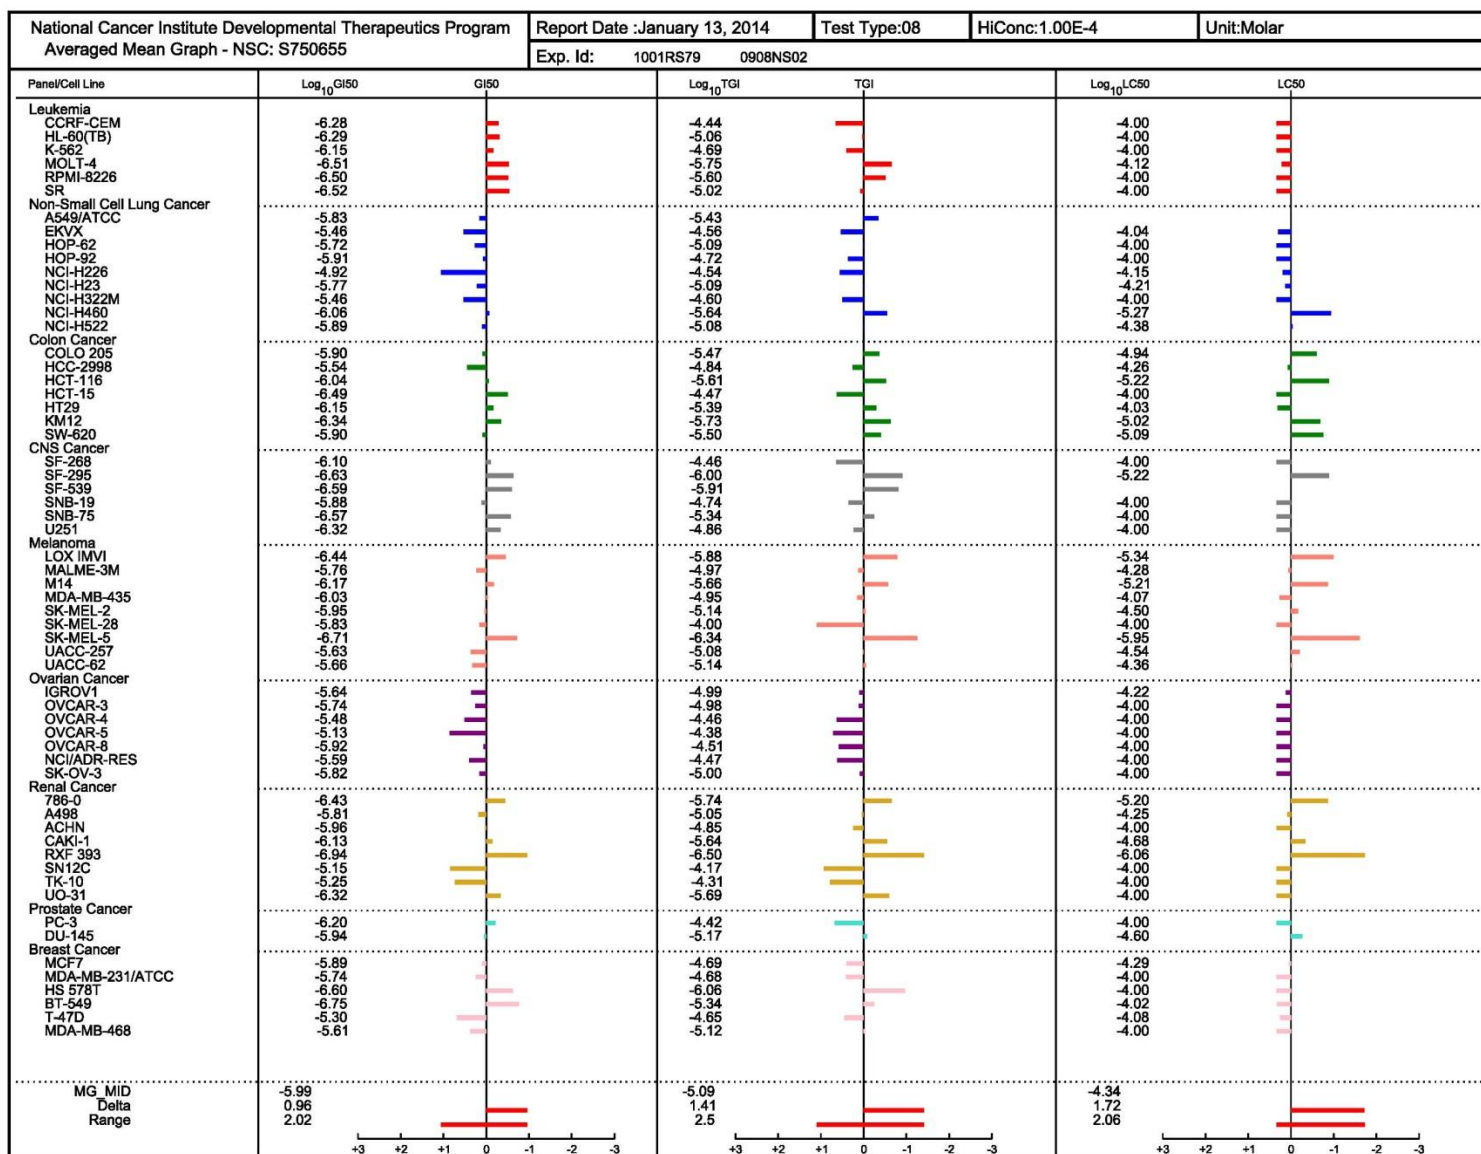

Average Mean Graph NCI 60 cell line data for compound 6

| National Cancer Institute Developmental Therapeutics Program |                        | Report Date :January 13, 2014 |                       | Test Type:08 |                        | HiConc:1.00E-4 |  | Unit:Molar |  |
|--------------------------------------------------------------|------------------------|-------------------------------|-----------------------|--------------|------------------------|----------------|--|------------|--|
| Averaged Mean Graph - NSC: S752116                           |                        | Exp. Id: 1003NS03 1005RS58    |                       |              |                        |                |  |            |  |
| Panel/Cell Line                                              | Log <sub>10</sub> GI50 | GI50                          | Log <sub>10</sub> TGI | TGI          | Log <sub>10</sub> LC50 | LC50           |  |            |  |
| <b>Leukemia</b>                                              |                        |                               |                       |              |                        |                |  |            |  |
| CCRF-CEM                                                     | -6.13                  |                               | -4.00                 |              | -4.00                  |                |  |            |  |
| HL-60(TB)                                                    | -4.73                  |                               | -4.00                 |              | -4.00                  |                |  |            |  |
| K-562                                                        | -5.69                  |                               | -4.00                 |              | -4.00                  |                |  |            |  |
| MOLT-4                                                       | -6.09                  |                               | -4.00                 |              | -4.00                  |                |  |            |  |
| RPMI-8226                                                    | -6.55                  |                               | -4.49                 |              | -4.00                  |                |  |            |  |
| SR                                                           | -6.12                  |                               | -4.00                 |              | -4.00                  |                |  |            |  |
| <b>Non-Small Cell Lung Cancer</b>                            |                        |                               |                       |              |                        |                |  |            |  |
| A549/ATCC                                                    | -5.20                  |                               | -4.00                 |              | -4.00                  |                |  |            |  |
| EKVX                                                         | -5.32                  |                               | -4.00                 |              | -4.00                  |                |  |            |  |
| HOP-62                                                       | -6.08                  |                               | -4.33                 |              | -4.00                  |                |  |            |  |
| HOP-92                                                       | -5.86                  |                               | -4.37                 |              | -4.00                  |                |  |            |  |
| NCI-H226                                                     | -4.24                  |                               | -4.00                 |              | -4.00                  |                |  |            |  |
| NCI-H23                                                      | -5.20                  |                               | -4.00                 |              | -4.00                  |                |  |            |  |
| NCI-H322M                                                    | -4.49                  |                               | -4.00                 |              | -4.00                  |                |  |            |  |
| NCI-H460                                                     | -5.48                  |                               | -4.00                 |              | -4.00                  |                |  |            |  |
| NCI-H522                                                     | -5.31                  |                               | -4.36                 |              | -4.00                  |                |  |            |  |
| <b>Colon Cancer</b>                                          |                        |                               |                       |              |                        |                |  |            |  |
| COLO 205                                                     | -5.56                  |                               | -5.08                 |              | -4.65                  |                |  |            |  |
| HCC-2998                                                     | -5.02                  |                               | -4.00                 |              | -4.00                  |                |  |            |  |
| HCT-116                                                      | -5.63                  |                               | -4.00                 |              | -4.00                  |                |  |            |  |
| HCT-15                                                       | -5.84                  |                               | -4.76                 |              | -4.00                  |                |  |            |  |
| HT29                                                         | -5.58                  |                               | -4.73                 |              | -4.10                  |                |  |            |  |
| KM12                                                         | -5.69                  |                               | -4.98                 |              | -4.13                  |                |  |            |  |
| SW-620                                                       | -5.69                  |                               | -5.08                 |              | -4.40                  |                |  |            |  |
| <b>CNS Cancer</b>                                            |                        |                               |                       |              |                        |                |  |            |  |
| SF-268                                                       | -5.37                  |                               | -4.00                 |              | -4.00                  |                |  |            |  |
| SF-295                                                       | -6.54                  |                               | -5.82                 |              | -4.29                  |                |  |            |  |
| SF-539                                                       | -6.49                  |                               | -5.56                 |              | -4.08                  |                |  |            |  |
| SNB-19                                                       | -5.58                  |                               | -4.00                 |              | -4.00                  |                |  |            |  |
| SNB-75                                                       | -6.31                  |                               | -4.00                 |              | -4.00                  |                |  |            |  |
| U251                                                         | -6.22                  |                               | -4.00                 |              | -4.00                  |                |  |            |  |
| <b>Melanoma</b>                                              |                        |                               |                       |              |                        |                |  |            |  |
| LOX IMVI                                                     | -5.55                  |                               | -4.12                 |              | -4.00                  |                |  |            |  |
| MALME-3M                                                     | -5.31                  |                               | -4.00                 |              | -4.00                  |                |  |            |  |
| M14                                                          | -5.78                  |                               | -5.03                 |              | -4.20                  |                |  |            |  |
| MDA-MB-435                                                   | -5.42                  |                               | -4.00                 |              | -4.00                  |                |  |            |  |
| SK-MEL-2                                                     | -5.71                  |                               | -4.00                 |              | -4.00                  |                |  |            |  |
| SK-MEL-28                                                    | -5.33                  |                               | -4.30                 |              | -4.04                  |                |  |            |  |
| SK-MEL-5                                                     | -5.85                  |                               | -5.50                 |              | -5.14                  |                |  |            |  |
| UACC-257                                                     | -4.92                  |                               | -4.09                 |              | -4.00                  |                |  |            |  |
| UACC-62                                                      | -6.02                  |                               | -5.12                 |              | -4.00                  |                |  |            |  |
| <b>Ovarian Cancer</b>                                        |                        |                               |                       |              |                        |                |  |            |  |
| IGROV1                                                       | -5.30                  |                               | -4.00                 |              | -4.00                  |                |  |            |  |
| OVCAR-3                                                      | -4.36                  |                               | -4.00                 |              | -4.00                  |                |  |            |  |
| OVCAR-4                                                      | -4.54                  |                               | -4.00                 |              | -4.00                  |                |  |            |  |
| OVCAR-5                                                      | -4.59                  |                               | -4.00                 |              | -4.00                  |                |  |            |  |
| OVCAR-8                                                      | -4.00                  |                               | -4.00                 |              | -4.00                  |                |  |            |  |
| NCI/ADR-RES                                                  | -4.19                  |                               | -4.00                 |              | -4.00                  |                |  |            |  |
| SK-OV-3                                                      | -5.47                  |                               | -4.00                 |              | -4.00                  |                |  |            |  |
| <b>Renal Cancer</b>                                          |                        |                               |                       |              |                        |                |  |            |  |
| 786-O                                                        | -6.44                  |                               | -4.96                 |              | -4.00                  |                |  |            |  |
| A498                                                         | -5.99                  |                               | -4.64                 |              | -4.00                  |                |  |            |  |
| ACHN                                                         | -5.15                  |                               | -4.00                 |              | -4.00                  |                |  |            |  |
| CAKI-1                                                       | -5.39                  |                               | -4.03                 |              | -4.00                  |                |  |            |  |
| RXF 393                                                      | -7.08                  |                               | -6.35                 |              | -4.95                  |                |  |            |  |
| SN12C                                                        | -4.23                  |                               | -4.00                 |              | -4.00                  |                |  |            |  |
| TK-10                                                        | -4.72                  |                               | -4.00                 |              | -4.00                  |                |  |            |  |
| UO-31                                                        | -6.32                  |                               | -5.23                 |              | -4.00                  |                |  |            |  |
| <b>Prostate Cancer</b>                                       |                        |                               |                       |              |                        |                |  |            |  |
| PC-3                                                         | -5.99                  |                               | -4.00                 |              | -4.00                  |                |  |            |  |
| DU-145                                                       | -5.09                  |                               | -4.00                 |              | -4.00                  |                |  |            |  |
| <b>Breast Cancer</b>                                         |                        |                               |                       |              |                        |                |  |            |  |
| MCF7                                                         | -5.61                  |                               | -4.30                 |              | -4.00                  |                |  |            |  |
| MDA-MB-231/ATCC                                              | -5.57                  |                               | -4.20                 |              | -4.00                  |                |  |            |  |
| HS 578T                                                      | -6.51                  |                               | -4.00                 |              | -4.00                  |                |  |            |  |
| BT-549                                                       | -5.43                  |                               | -4.30                 |              | -4.00                  |                |  |            |  |
| T-47D                                                        | -4.53                  |                               | -4.00                 |              | -4.00                  |                |  |            |  |
| MDA-MB-468                                                   | -5.52                  |                               | -4.57                 |              | -4.00                  |                |  |            |  |
| <b>Summary Statistics</b>                                    |                        |                               |                       |              |                        |                |  |            |  |
| MG MID                                                       | -5.5                   |                               | -4.34                 |              | -4.07                  |                |  |            |  |
| Delta                                                        | 1.58                   |                               | 2.02                  |              | 1.08                   |                |  |            |  |
| Range                                                        | 3.08                   |                               | 2.35                  |              | 1.14                   |                |  |            |  |

Average Mean Graph NCI 60 cell line data for compound 7

| National Cancer Institute Developmental Therapeutics Program<br>Averaged Mean Graph - NSC: S752816 |                        | Report Date :January 13, 2014 | Test Type:08          | HiConc:5.00E-5 | Unit:Molar             |      |
|----------------------------------------------------------------------------------------------------|------------------------|-------------------------------|-----------------------|----------------|------------------------|------|
|                                                                                                    |                        | Exp. Id: 1008RS00             |                       |                |                        |      |
| Panel/Cell Line                                                                                    | Log <sub>10</sub> GI50 | GI50                          | Log <sub>10</sub> TGI | TGI            | Log <sub>10</sub> LC50 | LC50 |
| <b>Leukemia</b>                                                                                    |                        |                               |                       |                |                        |      |
| CCRF-CEM                                                                                           | -6.83                  |                               | -4.30                 |                | -4.30                  |      |
| HL-60(TB)                                                                                          | -6.60                  |                               | -4.73                 |                | -4.30                  |      |
| K-562                                                                                              | -6.65                  |                               | -5.11                 |                | -4.30                  |      |
| MOLT-4                                                                                             | -6.77                  |                               | -4.30                 |                | -4.30                  |      |
| SR                                                                                                 | -6.53                  |                               | -4.30                 |                | -4.30                  |      |
| <b>Non-Small Cell Lung Cancer</b>                                                                  |                        |                               |                       |                |                        |      |
| A549/ATCC                                                                                          | -5.77                  |                               | -4.30                 |                | -4.30                  |      |
| EKVX                                                                                               | -5.97                  |                               | -4.30                 |                | -4.30                  |      |
| HOP-92                                                                                             | -6.63                  |                               | -4.30                 |                | -4.30                  |      |
| HOP-92                                                                                             | -6.23                  |                               | -4.30                 |                | -4.30                  |      |
| NCI-H226                                                                                           | -5.36                  |                               | -4.30                 |                | -4.30                  |      |
| NCI-H23                                                                                            | -6.37                  |                               | -4.85                 |                | -4.30                  |      |
| NCI-H322M                                                                                          | -4.98                  |                               | -4.30                 |                | -4.30                  |      |
| NCI-H460                                                                                           | -6.38                  |                               | -4.30                 |                | -4.30                  |      |
| <b>Colon Cancer</b>                                                                                |                        |                               |                       |                |                        |      |
| COLO 205                                                                                           | -6.52                  |                               | -5.87                 |                | -5.19                  |      |
| HCC-2998                                                                                           | -5.52                  |                               | -4.30                 |                | -4.30                  |      |
| HCT-116                                                                                            | -6.49                  |                               | -4.30                 |                | -4.30                  |      |
| HCT-15                                                                                             | -6.77                  |                               | -5.81                 |                | -4.30                  |      |
| HT29                                                                                               | -6.88                  |                               | -5.70                 |                | -4.30                  |      |
| KM12                                                                                               | -6.56                  |                               | -5.95                 |                | -4.30                  |      |
| SW-620                                                                                             | -6.35                  |                               | -5.76                 |                | -4.97                  |      |
| <b>CNS Cancer</b>                                                                                  |                        |                               |                       |                |                        |      |
| SF-268                                                                                             | -5.99                  |                               | -4.30                 |                | -4.30                  |      |
| SF-295                                                                                             | -7.50                  |                               | -6.87                 |                | -6.29                  |      |
| SF-539                                                                                             | -7.39                  |                               | -6.59                 |                | -5.53                  |      |
| SNB-19                                                                                             | -6.15                  |                               | -4.30                 |                | -4.30                  |      |
| SNB-75                                                                                             | -7.26                  |                               | -4.30                 |                | -4.30                  |      |
| U251                                                                                               | -6.82                  |                               | -4.30                 |                | -4.30                  |      |
| <b>Melanoma</b>                                                                                    |                        |                               |                       |                |                        |      |
| LOX IMVI                                                                                           | -6.70                  |                               | -5.93                 |                | -4.30                  |      |
| M14                                                                                                | -6.60                  |                               | -5.99                 |                | -4.30                  |      |
| MDA-MB-435                                                                                         | -6.17                  |                               | -4.30                 |                | -4.30                  |      |
| SK-MEL-2                                                                                           | -6.57                  |                               | -4.30                 |                | -4.30                  |      |
| SK-MEL-28                                                                                          | -6.26                  |                               | -5.72                 |                | -4.30                  |      |
| SK-MEL-5                                                                                           | -6.80                  |                               | -6.24                 |                | -5.74                  |      |
| UACC-257                                                                                           | -5.91                  |                               | -4.30                 |                | -4.30                  |      |
| UACC-62                                                                                            | -6.86                  |                               | -6.39                 |                | -5.44                  |      |
| <b>Ovarian Cancer</b>                                                                              |                        |                               |                       |                |                        |      |
| IGROV1                                                                                             | -6.38                  |                               | -4.30                 |                | -4.30                  |      |
| OVCAR-3                                                                                            | -4.87                  |                               | -4.30                 |                | -4.30                  |      |
| OVCAR-4                                                                                            | -5.28                  |                               | -4.30                 |                | -4.30                  |      |
| OVCAR-5                                                                                            | -4.82                  |                               | -4.30                 |                | -4.30                  |      |
| OVCAR-8                                                                                            | -4.89                  |                               | -4.30                 |                | -4.30                  |      |
| NCI/ADR-RES                                                                                        | -5.07                  |                               | -4.30                 |                | -4.30                  |      |
| SK-OV-3                                                                                            | -5.45                  |                               | -4.49                 |                | -4.30                  |      |
| <b>Renal Cancer</b>                                                                                |                        |                               |                       |                |                        |      |
| 786-0                                                                                              | -7.07                  |                               | -6.30                 |                | -4.30                  |      |
| A498                                                                                               | -6.89                  |                               | -6.14                 |                | -4.30                  |      |
| ACHN                                                                                               | -5.83                  |                               | -4.30                 |                | -4.30                  |      |
| CAKI-1                                                                                             | -6.58                  |                               | -4.30                 |                | -4.30                  |      |
| RXF 393                                                                                            | -7.35                  |                               | -6.34                 |                | -4.89                  |      |
| SN12C                                                                                              | -4.92                  |                               | -4.30                 |                | -4.30                  |      |
| TK-10                                                                                              | -5.11                  |                               | -4.30                 |                | -4.30                  |      |
| UO-31                                                                                              | -6.57                  |                               | -5.83                 |                | -4.30                  |      |
| <b>Prostate Cancer</b>                                                                             |                        |                               |                       |                |                        |      |
| PC-3                                                                                               | -6.64                  |                               | -4.30                 |                | -4.30                  |      |
| DU-145                                                                                             | -5.45                  |                               | -4.30                 |                | -4.30                  |      |
| <b>Breast Cancer</b>                                                                               |                        |                               |                       |                |                        |      |
| MCF7                                                                                               | -6.45                  |                               | -5.44                 |                | -4.30                  |      |
| MDA-MB-231/ATCC                                                                                    | -6.14                  |                               | -4.30                 |                | -4.30                  |      |
| HS 578T                                                                                            | -7.15                  |                               | -6.00                 |                | -4.30                  |      |
| BT-549                                                                                             | -6.97                  |                               | -4.88                 |                | -4.30                  |      |
| T-47D                                                                                              | -5.28                  |                               | -4.50                 |                | -4.30                  |      |
| MDA-MB-468                                                                                         | -6.29                  |                               | -5.03                 |                | -4.33                  |      |
| <b>MG MID</b>                                                                                      |                        |                               |                       |                |                        |      |
| Delta                                                                                              | -6.26                  |                               | -4.92                 |                | -4.45                  |      |
| Range                                                                                              | 1.24                   |                               | 1.94                  |                | 1.84                   |      |
|                                                                                                    | 2.68                   |                               | 2.56                  |                | 1.99                   |      |

Average Mean Graph NCI 60 cell line data for compound 8

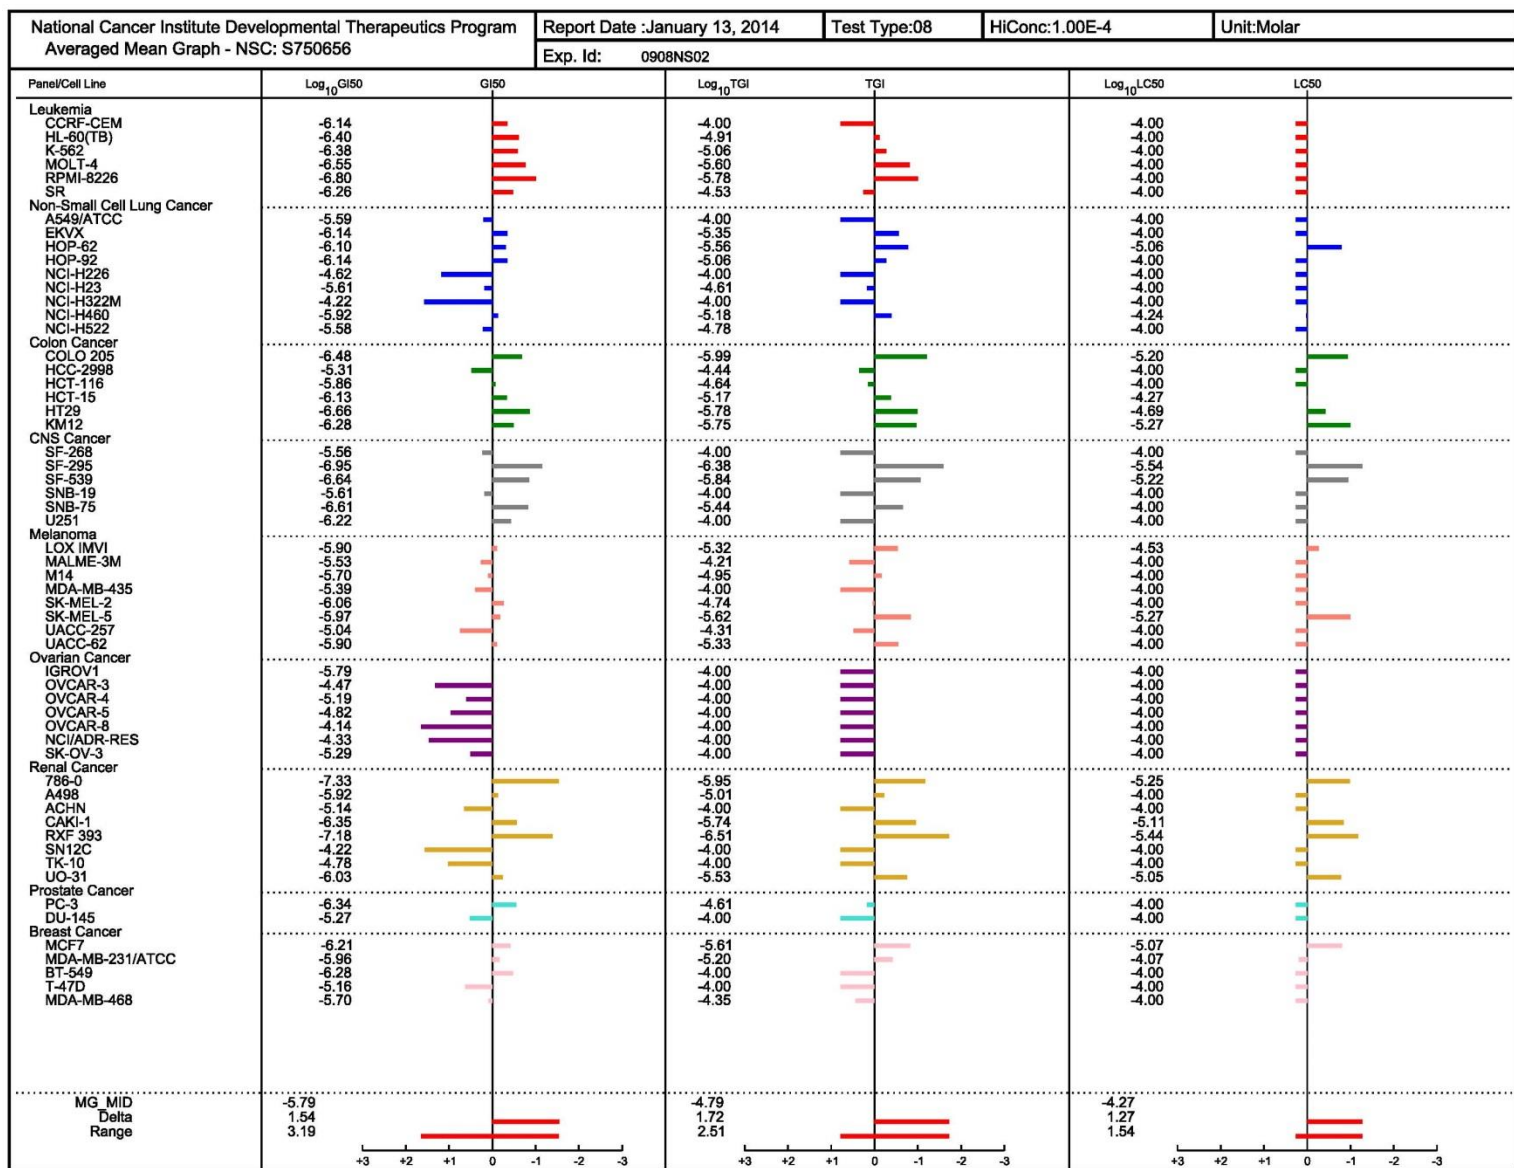

Average Mean Graph NCI 60 cell line data for compound 18

| National Cancer Institute Developmental Therapeutics Program<br>Averaged Mean Graph - NSC: S751060 |                        | Report Date :January 13, 2014 | Test Type:08          | HiConc:1.00E-4 | Unit:Molar             |      |
|----------------------------------------------------------------------------------------------------|------------------------|-------------------------------|-----------------------|----------------|------------------------|------|
|                                                                                                    |                        | Exp. Id: 0910NS96             |                       |                |                        |      |
| Panel/Cell Line                                                                                    | Log <sub>10</sub> GI50 | GI50                          | Log <sub>10</sub> TGI | TGI            | Log <sub>10</sub> LC50 | LC50 |
| <b>Leukemia</b>                                                                                    |                        |                               |                       |                |                        |      |
| CCRF-CEM                                                                                           | -6.82                  |                               |                       |                | -4.00                  |      |
| HL-60(TB)                                                                                          | -6.86                  |                               |                       |                | -4.00                  |      |
| K-562                                                                                              | -6.49                  |                               |                       |                | -4.00                  |      |
| MOLT-4                                                                                             | -7.04                  |                               |                       |                | -4.00                  |      |
| RPMI-8226                                                                                          | -7.55                  |                               |                       |                | -4.00                  |      |
| SR                                                                                                 | -6.52                  |                               |                       |                | -4.00                  |      |
| <b>Non-Small Cell Lung Cancer</b>                                                                  |                        |                               |                       |                |                        |      |
| A549/ATCC                                                                                          | -6.06                  |                               |                       |                | -4.00                  |      |
| EKVX                                                                                               | -6.27                  |                               |                       |                | -4.00                  |      |
| HOP-62                                                                                             | -6.30                  |                               |                       |                | -5.02                  |      |
| NCI-H226                                                                                           | -5.76                  |                               |                       |                | -4.23                  |      |
| NCI-H23                                                                                            | -6.16                  |                               |                       |                | -4.00                  |      |
| NCI-H322M                                                                                          | -5.45                  |                               |                       |                | -4.00                  |      |
| NCI-H460                                                                                           | -6.42                  |                               |                       |                | -4.43                  |      |
| NCI-H522                                                                                           | -6.15                  |                               |                       |                | -4.00                  |      |
| <b>Colon Cancer</b>                                                                                |                        |                               |                       |                |                        |      |
| COLO 205                                                                                           | -6.66                  |                               |                       |                | -6.05                  |      |
| HCC-2998                                                                                           | -5.55                  |                               |                       |                | -4.31                  |      |
| HCT-116                                                                                            | -6.27                  |                               |                       |                | -5.22                  |      |
| HCT-15                                                                                             | -6.40                  |                               |                       |                | -4.00                  |      |
| HT29                                                                                               | -6.54                  |                               |                       |                | -4.00                  |      |
| KM12                                                                                               | -6.72                  |                               |                       |                | -5.44                  |      |
| SW-620                                                                                             | -6.51                  |                               |                       |                | -5.26                  |      |
| <b>CNS Cancer</b>                                                                                  |                        |                               |                       |                |                        |      |
| SF-268                                                                                             | -6.55                  |                               |                       |                | -4.00                  |      |
| SF-295                                                                                             | -7.26                  |                               |                       |                | -6.10                  |      |
| SF-539                                                                                             | -6.85                  |                               |                       |                | -5.51                  |      |
| SNB-19                                                                                             | -6.17                  |                               |                       |                | -4.00                  |      |
| SNB-75                                                                                             | -7.03                  |                               |                       |                | -6.33                  |      |
| U251                                                                                               | -6.48                  |                               |                       |                | -4.50                  |      |
| <b>Melanoma</b>                                                                                    |                        |                               |                       |                |                        |      |
| LOX IMVI                                                                                           | -6.41                  |                               |                       |                | -5.35                  |      |
| MALME-3M                                                                                           | -6.24                  |                               |                       |                | -4.00                  |      |
| M14                                                                                                | -6.76                  |                               |                       |                | -6.13                  |      |
| MDA-MB-435                                                                                         | -6.45                  |                               |                       |                | -4.00                  |      |
| SK-MEL-2                                                                                           | -6.51                  |                               |                       |                | -4.00                  |      |
| SK-MEL-28                                                                                          | -6.68                  |                               |                       |                | -6.11                  |      |
| SK-MEL-5                                                                                           | -6.75                  |                               |                       |                | -6.45                  |      |
| UACC-257                                                                                           | -6.53                  |                               |                       |                | -6.12                  |      |
| UACC-62                                                                                            | -6.79                  |                               |                       |                | -6.40                  |      |
| <b>Ovarian Cancer</b>                                                                              |                        |                               |                       |                |                        |      |
| IGROV1                                                                                             | -6.01                  |                               |                       |                | -4.00                  |      |
| OVCAR-3                                                                                            | -5.92                  |                               |                       |                | -5.09                  |      |
| OVCAR-4                                                                                            | -6.06                  |                               |                       |                | -4.00                  |      |
| OVCAR-5                                                                                            | -6.00                  |                               |                       |                | -4.00                  |      |
| OVCAR-8                                                                                            | -5.44                  |                               |                       |                | -4.00                  |      |
| NCI/ADR-RES                                                                                        | -5.68                  |                               |                       |                | -4.00                  |      |
| SK-OV-3                                                                                            | -6.47                  |                               |                       |                | -5.89                  |      |
| <b>Renal Cancer</b>                                                                                |                        |                               |                       |                |                        |      |
| 786-0                                                                                              | -7.14                  |                               |                       |                | -5.52                  |      |
| A498                                                                                               | -6.61                  |                               |                       |                | -6.09                  |      |
| ACHN                                                                                               | -6.24                  |                               |                       |                | -5.16                  |      |
| CAKI-1                                                                                             | -7.10                  |                               |                       |                | -6.07                  |      |
| RXF-393                                                                                            | -7.02                  |                               |                       |                | -6.50                  |      |
| SN12C                                                                                              | -5.21                  |                               |                       |                | -4.29                  |      |
| TK-10                                                                                              | -5.81                  |                               |                       |                | -4.96                  |      |
| UO-31                                                                                              | -6.73                  |                               |                       |                | -6.01                  |      |
| <b>Prostate Cancer</b>                                                                             |                        |                               |                       |                |                        |      |
| PC-3                                                                                               | -6.72                  |                               |                       |                | -4.00                  |      |
| DU-145                                                                                             | -5.97                  |                               |                       |                | -4.04                  |      |
| <b>Breast Cancer</b>                                                                               |                        |                               |                       |                |                        |      |
| MCF7                                                                                               | -6.41                  |                               |                       |                | -5.70                  |      |
| MDA-MB-231/ATCC                                                                                    | -6.07                  |                               |                       |                | -4.00                  |      |
| HS 578T                                                                                            | -7.29                  |                               |                       |                | -6.11                  |      |
| BT-549                                                                                             | -6.64                  |                               |                       |                | -4.00                  |      |
| T-47D                                                                                              | -5.55                  |                               |                       |                | -4.30                  |      |
| MDA-MB-468                                                                                         | -6.20                  |                               |                       |                | -5.35                  |      |
| <b>MG MID</b>                                                                                      |                        |                               |                       |                |                        |      |
| Delta                                                                                              | -6.42                  |                               |                       |                | -4.5                   |      |
| Range                                                                                              | 1.2                    |                               |                       |                | 2                      |      |
|                                                                                                    | 2.42                   |                               |                       |                | 2.5                    |      |

Average Mean Graph NCI 60 cell line data for compound 19

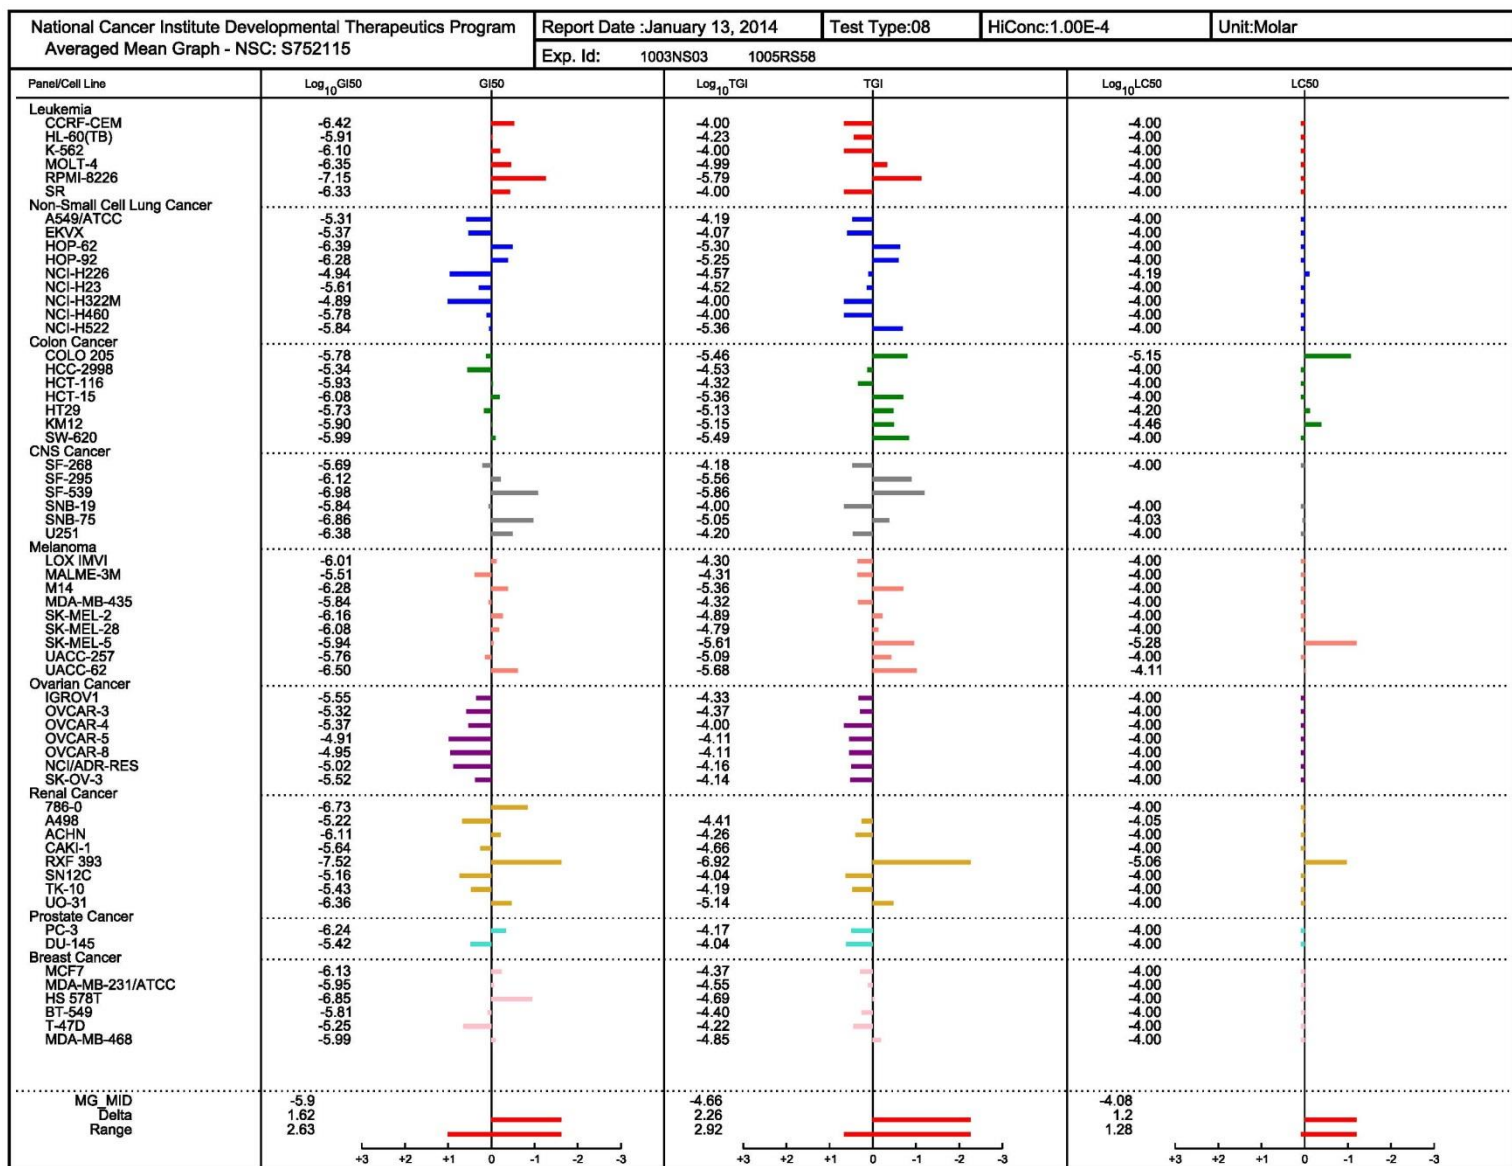

Average Mean Graph NCI 60 cell line data for compound 20

| National Cancer Institute Developmental Therapeutics Program<br>Averaged Mean Graph - NSC: S752114 |                        | Report Date :January 13, 2014 | Test Type:08          | HiConc:1.00E-4 | Unit:Molar             |      |
|----------------------------------------------------------------------------------------------------|------------------------|-------------------------------|-----------------------|----------------|------------------------|------|
|                                                                                                    |                        | Exp. Id: 1003NS03             | 1005RS58              |                |                        |      |
| Panel/Cell Line                                                                                    | Log <sub>10</sub> GI50 | GI50                          | Log <sub>10</sub> TGI | TGI            | Log <sub>10</sub> LC50 | LC50 |
| <b>Leukemia</b>                                                                                    |                        |                               |                       |                |                        |      |
| CCRF-CEM                                                                                           | -6.34                  |                               | -5.03                 |                | -4.00                  |      |
| HL-60(TB)                                                                                          | -5.92                  |                               | -4.41                 |                | -4.00                  |      |
| K-562                                                                                              | -6.00                  |                               | -4.48                 |                | -4.00                  |      |
| MOLT-4                                                                                             | -6.36                  |                               | -5.07                 |                | -4.00                  |      |
| RPMI-8226                                                                                          | -6.77                  |                               | -5.70                 |                | -4.00                  |      |
| SR                                                                                                 | -6.29                  |                               | -4.00                 |                | -4.00                  |      |
| <b>Non-Small Cell Lung Cancer</b>                                                                  |                        |                               |                       |                |                        |      |
| A549/ATCC                                                                                          | -5.72                  |                               | -4.00                 |                | -4.00                  |      |
| EKVX                                                                                               | -5.80                  |                               | -4.31                 |                | -4.00                  |      |
| HOP-62                                                                                             | -6.21                  |                               | -5.42                 |                | -4.54                  |      |
| HOP-92                                                                                             | -5.92                  |                               | -5.24                 |                | -4.00                  |      |
| NCI-H226                                                                                           | -5.22                  |                               | -4.00                 |                | -4.00                  |      |
| NCI-H23                                                                                            | -5.57                  |                               | -4.24                 |                | -4.00                  |      |
| NCI-H322M                                                                                          | -4.74                  |                               | -4.00                 |                | -4.00                  |      |
| NCI-H460                                                                                           | -5.97                  |                               | -4.92                 |                | -4.21                  |      |
| NCI-H522                                                                                           | -5.74                  |                               | -5.09                 |                | -4.00                  |      |
| <b>Colon Cancer</b>                                                                                |                        |                               |                       |                |                        |      |
| COLO 205                                                                                           | -5.96                  |                               | -5.52                 |                | -5.18                  |      |
| HCC-2998                                                                                           | -5.28                  |                               | -4.60                 |                | -4.12                  |      |
| HCT-116                                                                                            | -5.91                  |                               | -4.82                 |                | -4.29                  |      |
| HCT-15                                                                                             | -5.94                  |                               | -5.20                 |                | -4.19                  |      |
| HT29                                                                                               | -5.90                  |                               | -5.25                 |                | -4.36                  |      |
| KM12                                                                                               | -5.70                  |                               | -4.95                 |                | -4.38                  |      |
| SW-620                                                                                             | -5.89                  |                               | -5.47                 |                | -4.98                  |      |
| <b>CNS Cancer</b>                                                                                  |                        |                               |                       |                |                        |      |
| SF-268                                                                                             | -5.68                  |                               | -4.16                 |                | -4.00                  |      |
| SF-295                                                                                             | -6.77                  |                               | -6.27                 |                | -5.15                  |      |
| SF-539                                                                                             | -6.67                  |                               | -5.26                 |                | -4.24                  |      |
| SNB-19                                                                                             | -5.86                  |                               | -4.00                 |                | -4.00                  |      |
| SNB-75                                                                                             | -6.44                  |                               | -4.94                 |                | -4.00                  |      |
| U251                                                                                               | -6.45                  |                               | -4.81                 |                | -4.16                  |      |
| <b>Melanoma</b>                                                                                    |                        |                               |                       |                |                        |      |
| LOX IMVI                                                                                           | -5.79                  |                               | -4.77                 |                | -4.10                  |      |
| MALME-3M                                                                                           | -5.42                  |                               | -4.32                 |                | -4.00                  |      |
| M14                                                                                                | -6.24                  |                               | -4.78                 |                | -4.34                  |      |
| MDA-MB-435                                                                                         | -5.99                  |                               | -4.88                 |                | -4.04                  |      |
| SK-MEL-2                                                                                           | -6.07                  |                               | -4.69                 |                | -4.00                  |      |
| SK-MEL-28                                                                                          | -5.76                  |                               | -4.76                 |                | -4.19                  |      |
| SK-MEL-5                                                                                           | -6.29                  |                               | -5.97                 |                | -5.85                  |      |
| UACC-257                                                                                           | -5.61                  |                               | -4.45                 |                | -4.00                  |      |
| UACC-62                                                                                            | -6.45                  |                               | -5.66                 |                | -4.63                  |      |
| <b>Ovarian Cancer</b>                                                                              |                        |                               |                       |                |                        |      |
| IGROV1                                                                                             | -5.65                  |                               | -4.34                 |                | -4.02                  |      |
| OVCAR-3                                                                                            | -5.19                  |                               | -4.63                 |                | -4.24                  |      |
| OVCAR-4                                                                                            | -5.41                  |                               | -4.00                 |                | -4.00                  |      |
| OVCAR-5                                                                                            | -5.34                  |                               | -4.42                 |                | -4.00                  |      |
| OVCAR-8                                                                                            | -5.03                  |                               | -4.00                 |                | -4.00                  |      |
| NCI/ADR-RES                                                                                        | -5.19                  |                               | -4.00                 |                | -4.00                  |      |
| SK-OV-3                                                                                            | -5.59                  |                               | -4.40                 |                | -4.00                  |      |
| <b>Renal Cancer</b>                                                                                |                        |                               |                       |                |                        |      |
| 786-0                                                                                              | -6.67                  |                               | -5.62                 |                | -4.00                  |      |
| A498                                                                                               | -6.39                  |                               | -5.09                 |                | -4.00                  |      |
| ACHN                                                                                               | -6.00                  |                               | -4.06                 |                | -4.00                  |      |
| CAKI-1                                                                                             | -6.16                  |                               | -5.32                 |                | -4.00                  |      |
| RXF 393                                                                                            | -7.35                  |                               | -6.56                 |                | -5.37                  |      |
| SN12C                                                                                              | -5.22                  |                               | -4.00                 |                | -4.00                  |      |
| TK-10                                                                                              | -5.50                  |                               | -4.03                 |                | -4.00                  |      |
| UO-31                                                                                              | -6.30                  |                               | -5.52                 |                | -4.00                  |      |
| <b>Prostate Cancer</b>                                                                             |                        |                               |                       |                |                        |      |
| PC-3                                                                                               | -6.16                  |                               | -4.08                 |                | -4.00                  |      |
| DU-145                                                                                             | -5.61                  |                               | -4.18                 |                | -4.00                  |      |
| <b>Breast Cancer</b>                                                                               |                        |                               |                       |                |                        |      |
| MCF7                                                                                               | -5.82                  |                               | -4.84                 |                | -4.18                  |      |
| MDA-MB-231/ATCC                                                                                    | -5.83                  |                               | -4.47                 |                | -4.00                  |      |
| HS 578T                                                                                            | -6.45                  |                               | -5.30                 |                | -4.00                  |      |
| BT-549                                                                                             | -5.55                  |                               | -4.51                 |                | -4.00                  |      |
| T-47D                                                                                              | -5.36                  |                               | -4.41                 |                | -4.00                  |      |
| MDA-MB-468                                                                                         | -5.91                  |                               | -4.98                 |                | -4.00                  |      |
| <b>MG MID</b>                                                                                      |                        |                               |                       |                |                        |      |
| Delta                                                                                              | -5.9                   |                               | -4.77                 |                | -4.18                  |      |
| Range                                                                                              | 1.45                   |                               | 1.79                  |                | 1.47                   |      |
|                                                                                                    | 2.61                   |                               | 2.56                  |                | 1.65                   |      |

Average Mean Graph NCI 60 cell line data for compound 21



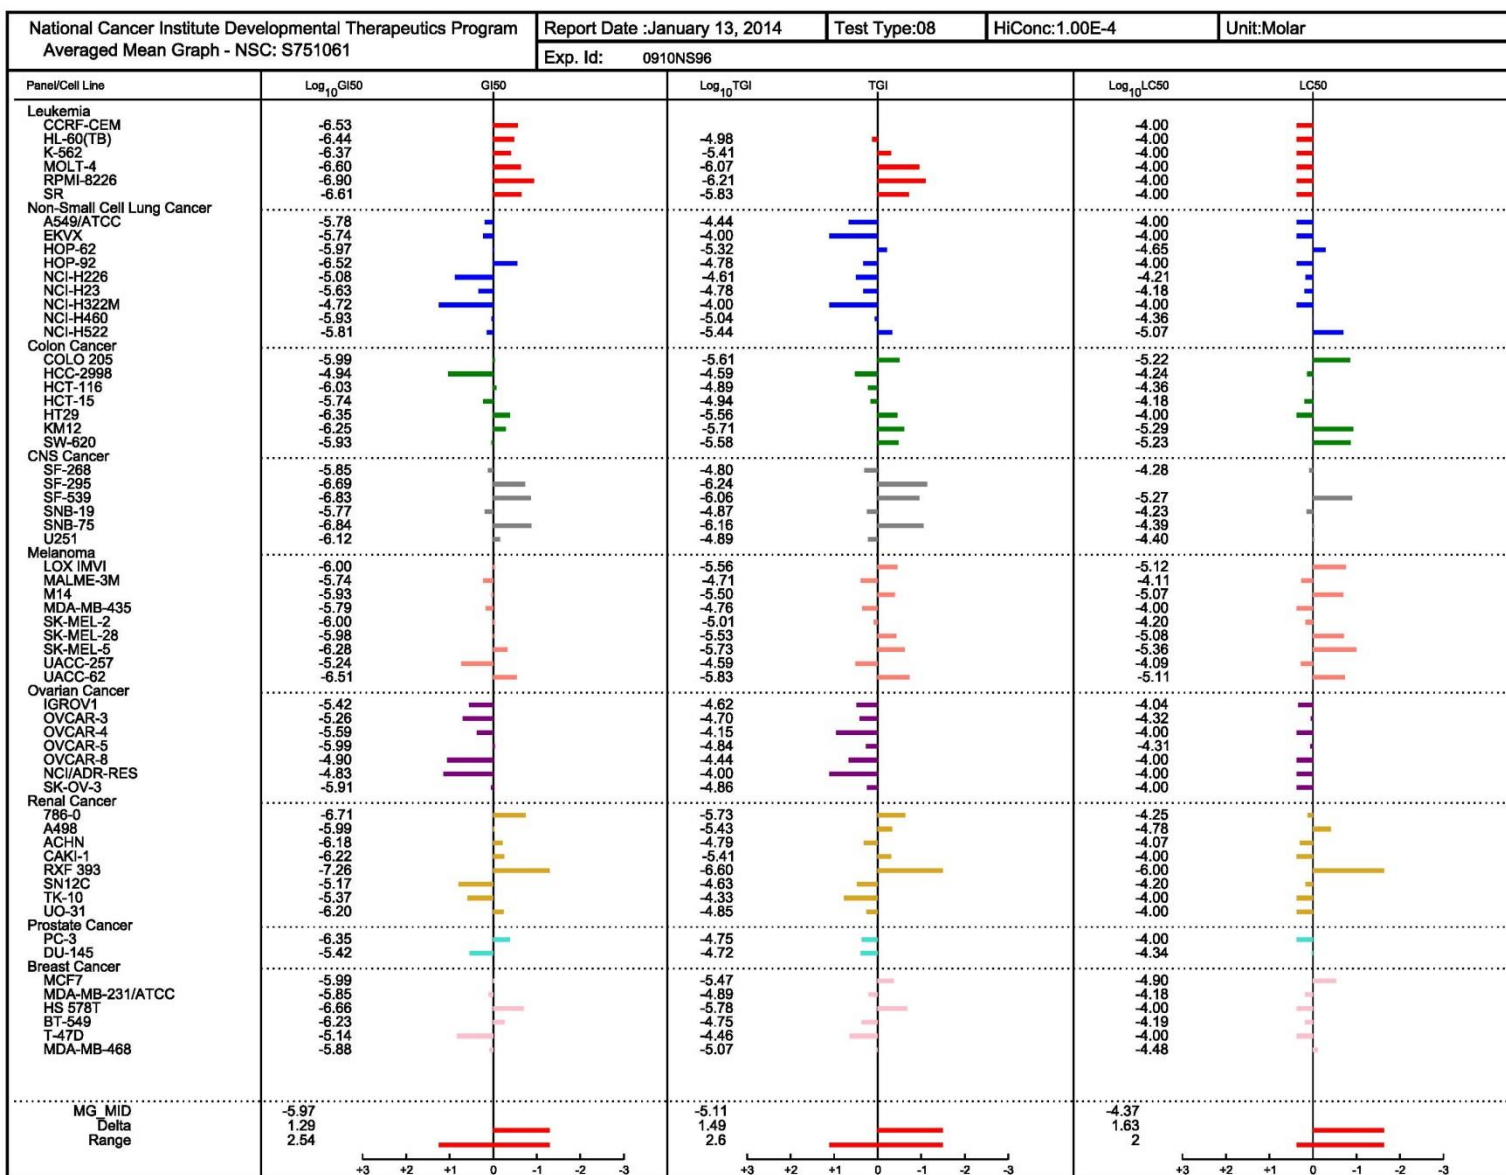

Average Mean Graph NCI 60 cell line data for compound 38

| National Cancer Institute Developmental Therapeutics Program<br>Averaged Mean Graph - NSC: S754492 |                        | Report Date :January 13, 2014 | Test Type:08          | HiConc:1.00E-4 | Unit:Molar             |      |
|----------------------------------------------------------------------------------------------------|------------------------|-------------------------------|-----------------------|----------------|------------------------|------|
|                                                                                                    |                        | Exp. Id: 1104RS29             | 1010NS36              |                |                        |      |
| Panel/Cell Line                                                                                    | Log <sub>10</sub> GI50 | GI50                          | Log <sub>10</sub> TGI | TGI            | Log <sub>10</sub> LC50 | LC50 |
| <b>Leukemia</b>                                                                                    |                        |                               |                       |                |                        |      |
| CCRF-CEM                                                                                           | -6.68                  |                               | -6.07                 |                | -4.00                  |      |
| HL-60(TB)                                                                                          | -6.72                  |                               | -5.61                 |                | -4.07                  |      |
| K-562                                                                                              | -6.51                  |                               | -5.86                 |                | -4.00                  |      |
| MOLT-4                                                                                             | -6.81                  |                               | -6.18                 |                | -4.00                  |      |
| RPMI-8226                                                                                          | -7.11                  |                               | -6.45                 |                | -4.00                  |      |
| SR                                                                                                 | -6.49                  |                               | -5.26                 |                | -4.00                  |      |
| <b>Non-Small Cell Lung Cancer</b>                                                                  |                        |                               |                       |                |                        |      |
| A549/ATCC                                                                                          | -6.28                  |                               | -4.89                 |                | -4.30                  |      |
| EKVX                                                                                               | -6.08                  |                               | -5.18                 |                | -4.00                  |      |
| HOP-62                                                                                             | -7.06                  |                               | -6.32                 |                | -5.63                  |      |
| HOP-92                                                                                             | -6.75                  |                               | -5.25                 |                | -4.03                  |      |
| NCI-H226                                                                                           | -5.57                  |                               | -5.01                 |                | -4.49                  |      |
| NCI-H23                                                                                            | -6.19                  |                               | -5.45                 |                | -4.57                  |      |
| NCI-H322M                                                                                          | -5.20                  |                               | -4.40                 |                | -4.00                  |      |
| NCI-H460                                                                                           | -6.43                  |                               | -5.66                 |                | -4.77                  |      |
| NCI-H522                                                                                           | -6.19                  |                               | -5.70                 |                | -5.28                  |      |
| <b>Colon Cancer</b>                                                                                |                        |                               |                       |                |                        |      |
| COLO 205                                                                                           | -6.66                  |                               | -5.32                 |                | -5.81                  |      |
| HCC-2998                                                                                           | -5.60                  |                               | -4.80                 |                | -4.27                  |      |
| HCT-116                                                                                            | -6.38                  |                               | -4.90                 |                | -4.24                  |      |
| HCT-15                                                                                             | -6.76                  |                               | -5.87                 |                | -5.21                  |      |
| HT29                                                                                               | -6.97                  |                               | -6.15                 |                | -5.55                  |      |
| KM12                                                                                               | -6.45                  |                               | -5.77                 |                | -5.10                  |      |
| SW-620                                                                                             | -6.54                  |                               | -5.95                 |                | -5.39                  |      |
| <b>ONS Cancer</b>                                                                                  |                        |                               |                       |                |                        |      |
| SF-268                                                                                             | -5.95                  |                               | -4.84                 |                | -4.04                  |      |
| SF-295                                                                                             | -7.32                  |                               | -6.66                 |                | -6.06                  |      |
| SF-539                                                                                             | -7.30                  |                               | -6.51                 |                | -5.60                  |      |
| SNB-19                                                                                             | -6.40                  |                               | -5.38                 |                | -4.55                  |      |
| SNB-75                                                                                             | -7.05                  |                               | -5.57                 |                | -4.12                  |      |
| U251                                                                                               | -7.12                  |                               | -5.64                 |                | -4.89                  |      |
| <b>Melanoma</b>                                                                                    |                        |                               |                       |                |                        |      |
| LOX IMVI                                                                                           | -6.53                  |                               | -5.89                 |                | -5.35                  |      |
| MALME-3M                                                                                           | -5.70                  |                               | -5.06                 |                | -4.04                  |      |
| M14                                                                                                | -6.28                  |                               | -5.55                 |                | -4.33                  |      |
| MDA-MB-435                                                                                         | -6.19                  |                               | -5.04                 |                | -4.13                  |      |
| SK-MEL-2                                                                                           | -6.48                  |                               | -5.80                 |                | -4.96                  |      |
| SK-MEL-28                                                                                          | -6.46                  |                               | -5.65                 |                | -4.80                  |      |
| SK-MEL-5                                                                                           | -6.58                  |                               | -6.17                 |                | -5.83                  |      |
| UACC-257                                                                                           | -5.68                  |                               | -4.89                 |                | -4.31                  |      |
| UACC-62                                                                                            | -6.64                  |                               | -6.18                 |                | -5.04                  |      |
| <b>Ovarian Cancer</b>                                                                              |                        |                               |                       |                |                        |      |
| IGROV1                                                                                             | -5.78                  |                               | -4.38                 |                | -4.00                  |      |
| OVCAR-3                                                                                            | -5.55                  |                               | -4.92                 |                | -4.42                  |      |
| OVCAR-4                                                                                            | -5.61                  |                               | -4.48                 |                | -4.00                  |      |
| OVCAR-5                                                                                            | -5.81                  |                               | -5.14                 |                | -4.29                  |      |
| OVCAR-8                                                                                            | -5.42                  |                               | -4.63                 |                | -4.13                  |      |
| NCI/ADR-RES                                                                                        | -5.54                  |                               | -4.54                 |                | -4.00                  |      |
| SK-OV-3                                                                                            | -6.11                  |                               | -5.14                 |                | -4.17                  |      |
| <b>Renal Cancer</b>                                                                                |                        |                               |                       |                |                        |      |
| 786-0                                                                                              | -7.30                  |                               | -6.52                 |                | -6.05                  |      |
| A498                                                                                               | -6.66                  |                               | -6.22                 |                | -5.28                  |      |
| ACHN                                                                                               | -5.90                  |                               | -4.82                 |                | -4.31                  |      |
| CAKI-1                                                                                             | -6.46                  |                               | -5.66                 |                | -4.27                  |      |
| RXF 393                                                                                            | -7.58                  |                               | -6.98                 |                | -6.14                  |      |
| SN12C                                                                                              | -5.60                  |                               | -4.72                 |                | -4.28                  |      |
| TK-10                                                                                              | -5.56                  |                               | -4.76                 |                | -4.18                  |      |
| UO-31                                                                                              | -6.36                  |                               | -5.16                 |                | -4.25                  |      |
| <b>Prostate Cancer</b>                                                                             |                        |                               |                       |                |                        |      |
| PC-3                                                                                               | -6.62                  |                               | -4.76                 |                | -4.00                  |      |
| DU-145                                                                                             | -5.69                  |                               | -4.82                 |                | -4.33                  |      |
| <b>Breast Cancer</b>                                                                               |                        |                               |                       |                |                        |      |
| MCF7                                                                                               | -6.40                  |                               | -5.43                 |                | -4.72                  |      |
| MDA-MB-231/ATCC                                                                                    | -6.57                  |                               | -5.62                 |                | -4.51                  |      |
| HS 578T                                                                                            | -7.27                  |                               | -6.16                 |                | -4.00                  |      |
| BT-549                                                                                             | -6.45                  |                               | -4.81                 |                | -4.17                  |      |
| T-47D                                                                                              | -6.76                  |                               | -4.77                 |                | -4.00                  |      |
| MDA-MB-468                                                                                         | -6.71                  |                               | -5.96                 |                | -4.98                  |      |
| <b>Summary</b>                                                                                     |                        |                               |                       |                |                        |      |
| MG_MID                                                                                             | -6.37                  |                               | -5.47                 |                | -4.59                  |      |
| Delta                                                                                              | 1.22                   |                               | 1.51                  |                | 1.55                   |      |
| Range                                                                                              | 2.38                   |                               | 2.6                   |                | 2.14                   |      |

Average Mean Graph NCI 60 cell line data for compound 43

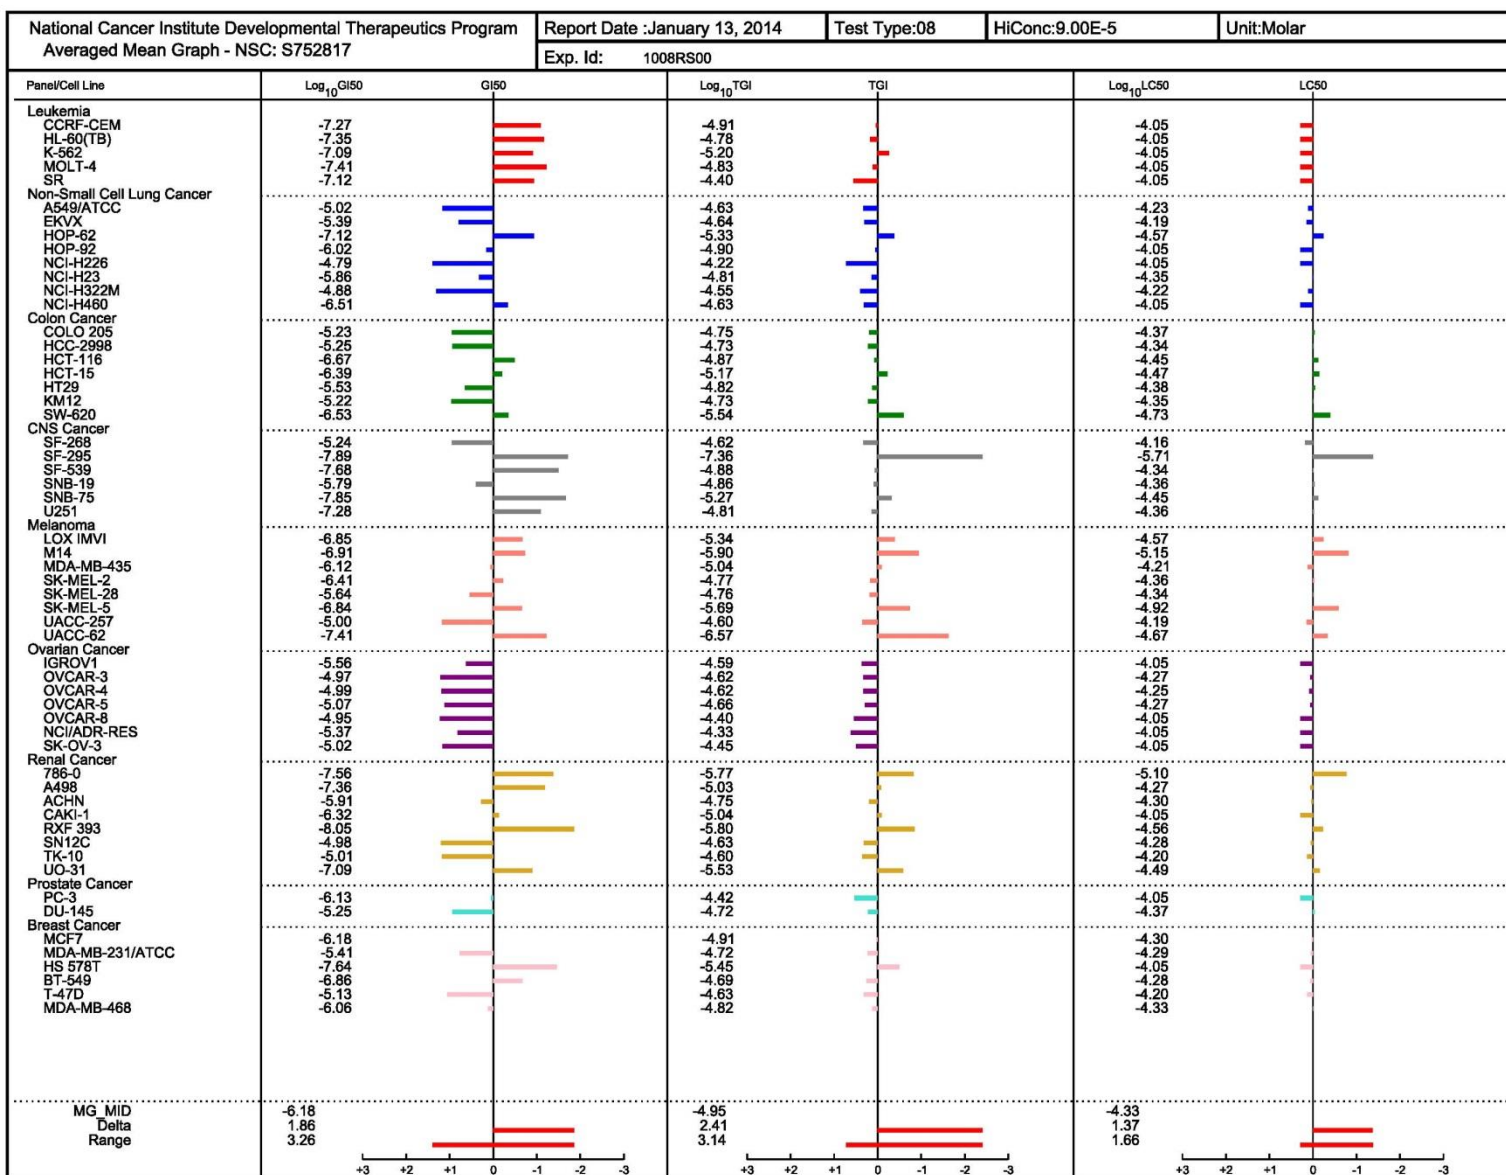

Average Mean Graph NCI 60 cell line data for compound 47

| National Cancer Institute Developmental Therapeutics Program<br>Averaged Mean Graph - NSC: S754493 |                        | Report Date :January 13, 2014 | Test Type:08          | HiConc:1.00E-4 | Unit:Molar             |      |
|----------------------------------------------------------------------------------------------------|------------------------|-------------------------------|-----------------------|----------------|------------------------|------|
|                                                                                                    |                        | Exp. Id: 1104RS29             | 1010NS36              |                |                        |      |
| Panel/Cell Line                                                                                    | Log <sub>10</sub> GI50 | GI50                          | Log <sub>10</sub> TGI | TGI            | Log <sub>10</sub> LC50 | LC50 |
| <b>Leukemia</b>                                                                                    |                        |                               |                       |                |                        |      |
| CCRF-CEM                                                                                           | -7.06                  |                               | -4.83                 |                | -4.00                  |      |
| HL-60(TB)                                                                                          | -7.19                  |                               | -4.74                 |                | -4.10                  |      |
| K-562                                                                                              | -6.86                  |                               | -5.01                 |                | -4.00                  |      |
| NOLT-4                                                                                             | -6.98                  |                               | -5.59                 |                | -4.00                  |      |
| RPMI-8226                                                                                          | -7.95                  |                               | -6.38                 |                | -4.00                  |      |
| SR                                                                                                 | -6.81                  |                               | -4.49                 |                | -4.00                  |      |
| <b>Non-Small Cell Lung Cancer</b>                                                                  |                        |                               |                       |                |                        |      |
| A549/ATCC                                                                                          | -5.62                  |                               | -4.41                 |                | -4.17                  |      |
| EKVX                                                                                               | -5.41                  |                               | -4.40                 |                | -4.09                  |      |
| HOP-62                                                                                             | -7.30                  |                               | -5.77                 |                | -4.39                  |      |
| HOP-92                                                                                             | -5.94                  |                               | -4.64                 |                | -4.09                  |      |
| NCI-H226                                                                                           | -5.08                  |                               | -4.48                 |                | -4.14                  |      |
| NCI-H23                                                                                            | -5.81                  |                               | -4.57                 |                | -4.18                  |      |
| NCI-H322M                                                                                          | -4.74                  |                               | -4.31                 |                | -4.11                  |      |
| NCI-H460                                                                                           | -6.68                  |                               | -4.57                 |                | -4.18                  |      |
| NCI-H522                                                                                           | -5.76                  |                               | -5.14                 |                | -4.68                  |      |
| <b>Colon Cancer</b>                                                                                |                        |                               |                       |                |                        |      |
| COLO 205                                                                                           | -5.38                  |                               | -5.03                 |                | -4.67                  |      |
| HCC-2998                                                                                           | -5.22                  |                               | -4.43                 |                | -4.17                  |      |
| HCT-116                                                                                            | -6.47                  |                               | -4.44                 |                | -4.19                  |      |
| HCT-15                                                                                             | -6.66                  |                               | -5.31                 |                | -4.44                  |      |
| HT29                                                                                               | -6.08                  |                               | -5.27                 |                | -4.67                  |      |
| KM12                                                                                               | -5.53                  |                               | -4.99                 |                | -4.48                  |      |
| SW-620                                                                                             | -6.52                  |                               | -5.37                 |                | -4.67                  |      |
| <b>CNS Cancer</b>                                                                                  |                        |                               |                       |                |                        |      |
| SF-268                                                                                             | -6.07                  |                               | -4.41                 |                | -4.16                  |      |
| SF-295                                                                                             | -7.63                  |                               | -6.94                 |                | -5.19                  |      |
| SF-539                                                                                             | -8.00                  |                               | -5.35                 |                | -4.61                  |      |
| SNB-19                                                                                             | -6.24                  |                               | -4.45                 |                | -4.19                  |      |
| SNB-75                                                                                             | -8.00                  |                               | -4.98                 |                | -4.19                  |      |
| U251                                                                                               | -8.00                  |                               | -4.49                 |                | -4.22                  |      |
| <b>Melanoma</b>                                                                                    |                        |                               |                       |                |                        |      |
| LOX IMVI                                                                                           | -6.55                  |                               | -5.18                 |                | -4.51                  |      |
| MALME-3M                                                                                           | -5.27                  |                               | -4.50                 |                | -4.00                  |      |
| M14                                                                                                | -6.27                  |                               | -4.49                 |                | -4.19                  |      |
| MDA-MB-435                                                                                         | -6.36                  |                               | -4.42                 |                | -4.02                  |      |
| SK-MEL-2                                                                                           | -6.98                  |                               | -5.28                 |                | -4.30                  |      |
| SK-MEL-28                                                                                          | -6.17                  |                               | -4.97                 |                | -4.33                  |      |
| SK-MEL-5                                                                                           | -5.91                  |                               | -5.67                 |                | -5.16                  |      |
| UACC-257                                                                                           | -4.84                  |                               | -4.31                 |                | -4.11                  |      |
| UACC-62                                                                                            | -7.00                  |                               | -6.02                 |                | -4.47                  |      |
| <b>Ovarian Cancer</b>                                                                              |                        |                               |                       |                |                        |      |
| IGROV1                                                                                             | -5.30                  |                               | -4.34                 |                | -4.05                  |      |
| OVCAR-3                                                                                            | -5.06                  |                               | -4.44                 |                | -4.20                  |      |
| OVCAR-4                                                                                            | -4.97                  |                               | -4.32                 |                | -4.11                  |      |
| OVCAR-5                                                                                            | -5.27                  |                               | -4.52                 |                | -4.22                  |      |
| OVCAR-8                                                                                            | -4.94                  |                               | -4.32                 |                | -4.10                  |      |
| NCI/ADR-RES                                                                                        | -5.12                  |                               | -4.33                 |                | -4.07                  |      |
| SK-OV-3                                                                                            | -5.33                  |                               | -4.40                 |                | -4.11                  |      |
| <b>Renal Cancer</b>                                                                                |                        |                               |                       |                |                        |      |
| 786-0                                                                                              | -8.00                  |                               | -5.61                 |                | -4.67                  |      |
| A498                                                                                               | -7.18                  |                               | -5.57                 |                | -4.35                  |      |
| ACHN                                                                                               | -5.44                  |                               | -4.42                 |                | -4.21                  |      |
| CAKI-1                                                                                             | -6.81                  |                               | -4.77                 |                | -4.10                  |      |
| RXF 393                                                                                            | -8.00                  |                               | -7.47                 |                | -5.07                  |      |
| SN12C                                                                                              | -5.07                  |                               | -4.34                 |                | -4.12                  |      |
| TK-10                                                                                              | -5.06                  |                               | -4.39                 |                | -4.16                  |      |
| UO-31                                                                                              | -6.89                  |                               | -4.67                 |                | -4.18                  |      |
| <b>Prostate Cancer</b>                                                                             |                        |                               |                       |                |                        |      |
| PC-3                                                                                               | -5.88                  |                               | -4.36                 |                | -4.00                  |      |
| DU-145                                                                                             | -5.28                  |                               | -4.40                 |                | -4.19                  |      |
| <b>Breast Cancer</b>                                                                               |                        |                               |                       |                |                        |      |
| MCF7                                                                                               | -6.27                  |                               | -4.91                 |                | -4.26                  |      |
| MDA-MB-231/ATCC                                                                                    | -6.05                  |                               | -5.01                 |                | -4.34                  |      |
| HS 578T                                                                                            | -8.00                  |                               | -6.01                 |                | -4.00                  |      |
| BT-549                                                                                             | -6.32                  |                               | -4.38                 |                | -4.17                  |      |
| T-47D                                                                                              | -5.09                  |                               | -4.40                 |                | -4.00                  |      |
| MDA-MB-468                                                                                         | -6.74                  |                               | -5.32                 |                | -4.17                  |      |
| <b>MG_MID</b>                                                                                      |                        |                               |                       |                |                        |      |
| Delta                                                                                              | -6.24                  |                               | -4.91                 |                | -4.27                  |      |
| Range                                                                                              | 1.76                   |                               | 2.56                  |                | 0.93                   |      |
|                                                                                                    | 3.26                   |                               | 3.16                  |                | 1.19                   |      |

Average Mean Graph NCI 60 cell line data for compound 50
